# Supplementary material for: Enantioselective synthesis of 4,5,6,7-tetrahydroindoles via olefin cross-metathesis/intramolecular Friedel–Crafts alkylation reaction of pyrroles
Source: Royal Society of Chemistry journal article supplement (doi:10.1039/c5qo00034c), 2015-01-01
Supplement: c5qo00034c1.pdf [file c5qo00034c1.pdf]

*Supporting Information for*

Enantioselective Synthesis of 4,5,6,7-Tetrahydroindoles *via* Olefin  
Cross-Metathesis/Intramolecular Friedel–Crafts Alkylation Reaction of Pyrroles

Jun-Wei Zhang,<sup>a,b</sup> Xiao-Wei Liu,<sup>a</sup> Qing Gu,<sup>a</sup> Xiao-Xin Shi,<sup>b</sup> and Shu-Li You<sup>a,b\*</sup>

<sup>a</sup> State Key Laboratory of Organometallic Chemistry, Shanghai Institute of Organic Chemistry,  
Chinese Academy of Sciences, 345 Lingling Lu, Shanghai 200032, China

Fax (+86) 21-54925087; E-mail: slyou@sioc.ac.cn

<sup>b</sup> School of Pharmacy, East China University of Science and Technology, 130 Mei-Long Road,  
Shanghai 200237, China

**Table of Contents**

|                                                                                      |         |
|--------------------------------------------------------------------------------------|---------|
| <b>General Methods</b>                                                               | S2      |
| <b>Experimental Sections</b>                                                         |         |
| General procedure for preparation of <b>1a-d</b>                                     | S2-S5   |
| General procedure for preparation of <b>1e-f</b>                                     | S5-S7   |
| General procedure for preparation of <b>1g, 1h, 1i</b>                               | S7-S10  |
| General procedure for the enantioselective synthesis of<br>4,5,6,7-tetrahydroindoles | S10-S19 |
| X-Ray structure of enantiopure <b>3k</b>                                             | S19-S22 |
| <b>Copies of NMR Spectra and HPLC Chromatographs</b>                                 | S23-S85 |

**General Methods.** Unless stated otherwise, all reactions were carried out in flame-dried glassware under a dry argon atmosphere. All solvents were purified and dried according to standard methods prior to use.  $^1\text{H}$  and  $^{13}\text{C}$  NMR spectra were recorded on a Varian instrument (300 MHz and 75 MHz, 400 MHz and 100 MHz, respectively) and internally referenced to tetramethylsilane signal or residual protonic solvent signals. Data for  $^1\text{H}$  NMR are recorded as follows: chemical shift ( $\delta$ , ppm), multiplicity (s = singlet, d = doublet, t = triplet, m = multiplet or unresolved, br = broad singlet, coupling constant(s) in Hz, integration). Data for  $^{13}\text{C}$  NMR are reported in terms of chemical shift ( $\delta$ , ppm).

## Experimental Sections:

### General procedure for preparation of 1a-d

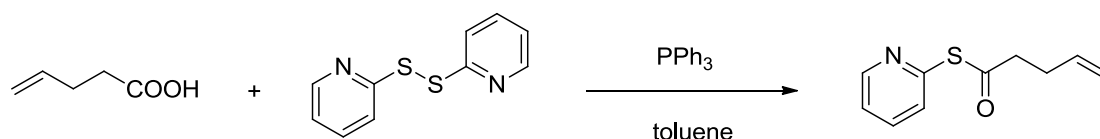

A dry three-necked flask was charged with 4-pentenoic acid (20 g, 200 mmol, 1.0 equiv), toluene (300 mL), 2, 2'-dithiodipyridine (52.8 g, 240 mmol, 1.2 equivs) and triphenylphosphine (62.9 g, 240 mmol, 1.2 equivs). The mixture was then stirred at room temperature for 1 hour. When the reaction was complete (monitored by TLC), the solvent was evaporated under reduced pressure. The crude product was purified by column chromatography ( $\text{SiO}_2$ , petroleum ether/ethyl acetate = 10: 1) to afford S-pyridin-2-yl pent-4-enethioate (20.4 g, 53% yield).

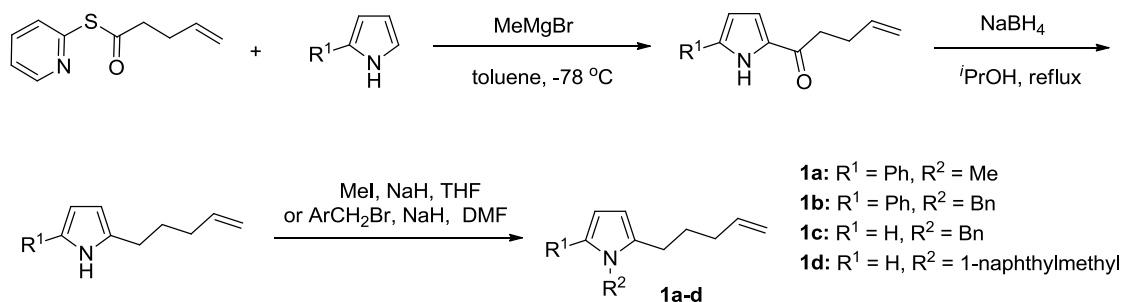

$\text{MeMgBr}$  (1.5 equivs, 3M in  $\text{Et}_2\text{O}$ ) was added dropwise to a solution of pyrrole

or 2-phenyl pyrrole (1.0 equiv, 0.1 M) in toluene at -78 °C in a dry three-necked flask. After the reaction was stirred at room temperature for 1 hour, S-pyridin-2-yl pent-4-enethioate (1.5 equiv, 1.0 mol/L) in toluene was added slowly to the reaction mixture at -78 °C. Then the reaction mixture was stirred at room temperature. When the reaction was complete (monitored by TLC), it was quenched by saturated NH<sub>4</sub>Cl (aq.) at 0 °C and extracted with ethyl acetate. The combined organic layers were washed with brine, dried over anhydrous Na<sub>2</sub>SO<sub>4</sub>, and filtered. After the solvent was removed under reduced pressure, the residue was purified by column chromatography (SiO<sub>2</sub>, petroleum ether/ethyl acetate = 50: 1) to afford acylated pyrrole.

The acylated pyrrole was dissolved in *i*PrOH (0.5 mol/L), and then sodium borohydride (2.0 equiv) was added. The reaction mixture was refluxed until pyrrole was fully consumed (monitored by TLC). After the solvent was evaporated under reduced pressure, the crude product was purified by column chromatography (SiO<sub>2</sub>, petroleum ether/ethyl acetate = 50: 1) to afford the alkylated pyrrole.

To a suspension of NaH (3.0 equivs) in THF (0.1 M) or DMF (0.1 M) in a dry three-necked flask was added alkylated pyrrole (1.0 equiv) in THF or DMF slowly at 0 °C. After the mixture was stirred at room temperature for 1 hour, MeI (3.0 equivs) or ArCH<sub>2</sub>Br (1.5 equivs) was added dropwise at 0 °C. The reaction was stirred at room temperature until alkylated pyrrole was fully consumed (monitored by TLC). It was quenched by water at 0 °C and extracted with ethyl acetate. The organic layers were washed with brine, dried over anhydrous Na<sub>2</sub>SO<sub>4</sub> and filtered. After the solvent was removed under reduced pressure, the residue was purified by column chromatography (SiO<sub>2</sub>, petroleum ether/ethyl acetate = 1/100-1/500) to afford **1a-d**.

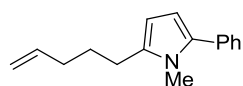

**1-Methyl-2-(pent-4-en-1-yl)-5-phenyl-1H-pyrrole (1a)**

Yellow liquid (1.2 g, 22% yield over three steps), following silica gel column chromatography (ethyl acetate/petroleum ether = 1/100, v/v). Analytical data for **1a**: <sup>1</sup>H NMR (300 MHz, CDCl<sub>3</sub>) δ 1.74-1.84 (m, 2H), 2.21 (dt, *J*<sub>1</sub> = 6.9 Hz, *J*<sub>2</sub> = 7.5 Hz, 2H), 2.62 (t, *J* = 8.1 Hz, 2H), 3.51 (s, 3H), 5.02 (d, *J* = 10.2 Hz, 1H), 5.07 (d, *J* = 17.1 Hz, 1H), 5.82-5.91 (m, 1H), 5.97 (d, *J* = 3.3 Hz, 1H), 6.15 (d, *J* = 3.6 Hz, 1H),

7.23-7.30 (m, 1H), 7.35-7.38 (m, 4H);  $^{13}\text{C}$  NMR (75 MHz,  $\text{CDCl}_3$ )  $\delta$  26.4, 27.7, 31.6, 33.5, 105.3, 107.4, 114.9, 126.4, 128.3, 128.7, 133.9, 134.1, 134.9, 138.4; IR (film) 2931, 1640, 1601, 1511, 1455, 1308, 992, 910, 749, 698  $\text{cm}^{-1}$ ; HRMS (ESI) exact mass calcd for  $\text{C}_{16}\text{H}_{20}\text{N}$  ( $\text{M}+\text{H}$ ) $^+$  requires  $m/z$  226.1590, found  $m/z$  226.1594.

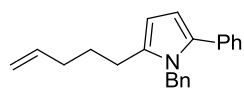

**1-Benzyl-2-(pent-4-en-1-yl)-5-phenyl-1H-pyrrole (1b)**

Yellow solid (276 mg, 10% yield over three steps), following silica gel column chromatography (ethyl acetate/petroleum ether = 1/250, v/v). Analytical data for **1b**: m.p. = 43-44  $^{\circ}\text{C}$ ;  $^1\text{H}$  NMR (300 MHz,  $\text{CDCl}_3$ )  $\delta$  1.68-1.75 (m, 2H), 2.08 (dt,  $J_1 = 6.9$  Hz,  $J_2 = 7.2$  Hz, 2H), 2.43 (t,  $J = 7.8$  Hz, 2H), 4.92 (d,  $J = 9.6$  Hz, 1H), 4.97 (d,  $J = 16.8$  Hz, 1H), 5.13 (s, 2H), 5.71-5.76 (m, 1H), 6.07 (d,  $J = 3.0$  Hz, 1H), 6.25 (d,  $J = 3.9$  Hz, 1H), 6.90 (d,  $J = 6.9$  Hz, 2H), 7.20-7.31 (m, 8H);  $^{13}\text{C}$  NMR (75 MHz,  $\text{CDCl}_3$ )  $\delta$  26.0, 27.6, 33.4, 47.5, 106.0, 108.1, 114.7, 125.6, 126.6, 126.9, 128.3, 128.7, 128.8, 133.7, 134.5, 134.8, 138.4, 139.1; IR (film) 2931, 1601, 1495, 1450, 1360, 1312, 1074, 1027, 913, 749, 726, 698  $\text{cm}^{-1}$ ; HRMS (ESI) exact mass calcd for  $\text{C}_{22}\text{H}_{24}\text{N}$  ( $\text{M}+\text{H}$ ) $^+$  requires  $m/z$  302.1903, found  $m/z$  302.1910.

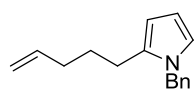

**1-Benzyl-2-(pent-4-en-1-yl)-1H-pyrrole (1c)**

Yellow liquid (1.1 g, 22% yield over three steps), following silica gel column chromatography (ethyl acetate/petroleum ether = 1/300, v/v). Analytical data for **1c**:  $^1\text{H}$  NMR (300 MHz,  $\text{CDCl}_3$ )  $\delta$  1.61-1.71 (m, 2H), 2.07 (dt,  $J_1 = 7.2$  Hz,  $J_2 = 6.9$  Hz, 2H), 2.46 (t,  $J = 7.5$  Hz, 2H), 4.93 (d,  $J = 9.9$  Hz, 1H), 4.98 (d,  $J = 16.8$  Hz, 1H), 5.03 (s, 2H), 5.71-5.80 (m, 1H), 5.97 (s, 1H), 6.13 (t,  $J = 3.0$  Hz, 1H), 6.61 (s, 1H), 6.98 (d,  $J = 7.5$  Hz, 2H), 7.24-7.32 (m, 3H);  $^{13}\text{C}$  NMR (75 MHz,  $\text{CDCl}_3$ )  $\delta$  25.5, 27.9, 33.3, 50.2, 106.0, 107.1, 114.7, 120.8, 126.3, 127.3, 128.6, 133.2, 138.4, 138.5; IR (film) 2931, 2860, 1703, 1640, 1495, 1453, 1428, 1355, 1295, 1074, 1029, 992, 910, 695  $\text{cm}^{-1}$ ; HRMS (ESI) exact mass calcd for  $\text{C}_{16}\text{H}_{20}\text{N}$  ( $\text{M}+\text{H}$ ) $^+$  requires  $m/z$  226.1590, found  $m/z$  226.1591.

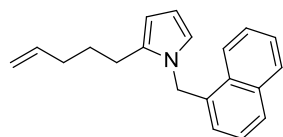

**1-(Naphthalen-1-ylmethyl)-2-(pent-4-en-1-yl)-1H-pyrrole**  
**(1d)**

Yellow liquid (400 mg, 18% yield over three steps), following silica gel column chromatography (ethyl acetate/petroleum ether = 1/300, v/v). Analytical data for **1d**:  $^1\text{H}$  NMR (300 MHz,  $\text{CDCl}_3$ )  $\delta$  1.63-1.73 (m, 2H), 2.03 (dt,  $J_1 = 6.9$  Hz,  $J_2 = 7.5$  Hz, 2H), 2.46 (t,  $J = 7.8$  Hz, 2H), 4.88 (d,  $J = 11.1$  Hz, 1H), 4.93 (d,  $J = 17.7$  Hz, 1H), 5.39 (s, 2H), 5.64-5.78 (m, 1H), 6.04 (m, 1H), 6.16-6.18 (m, 1H), 6.55-6.59 (m, 2H), 7.30 (t,  $J = 7.8$  Hz, 1H), 7.44-7.52 (m, 2H), 7.70 (d,  $J = 8.4$  Hz, 1H), 7.82-7.88 (m, 2H);  $^{13}\text{C}$  NMR (75 MHz,  $\text{CDCl}_3$ )  $\delta$  25.4, 27.8, 33.2, 47.8, 105.9, 107.2, 114.7, 120.9, 122.2, 123.7, 125.6, 125.7, 126.3, 127.7, 128.8, 130.2, 133.2, 133.3, 133.9, 138.2; IR (film) 2929, 2858, 1639, 1486, 1428, 1297, 1076, 991, 910, 791, 769, 702  $\text{cm}^{-1}$ ; HRMS (ESI) exact mass calcd for  $\text{C}_{20}\text{H}_{22}\text{N}$  ( $\text{M}+\text{H}$ ) $^+$  requires  $m/z$  276.1747, found  $m/z$  276.1749.

**Procedure for preparation of 1e-f**

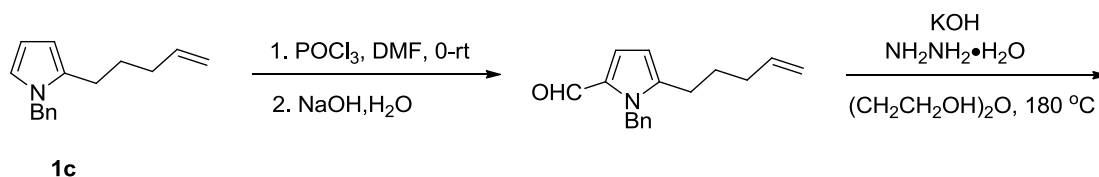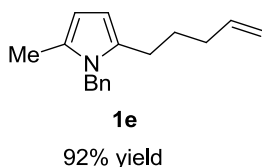

To a solution of **1c** (450 mg, 2 mmol) in DMF (10 mL) in a dry three-necked flask was added  $\text{POCl}_3$  (367 mg, 2.4 mmol, 1.2 equiv) dropwise at 0 °C. After the reaction mixture was stirred at room temperature for 4 hours, it was slowly adjusted by the addition of saturated NaOH (aq.) to pH >7 at 0 °C. Then the reaction was stirred at 60 °C for 2 hours. After the reaction was complete (monitored by TLC), the mixture was extracted with ethyl acetate. The organic layers were washed with brine, dried over anhydrous  $\text{Na}_2\text{SO}_4$  and filtrated. The solvent was removed in vacuo to afford the crude product which was used in the next step without purification.

KOH (400 mg, 7.1 mmol) and hydrazine hydrate (2 mL, 80%) were added to a solution of 1-benzyl-5-(pent-4-en-1-yl)-1H-pyrrole-2-carbaldehyde in diethylene glycol ether (5 mL). The reaction mixture was stirred at 180 °C. After the reaction was complete (monitored by TLC), it was quenched with H<sub>2</sub>O and extracted with ethyl acetate. The organic layers were washed with brine, dried over anhydrous Na<sub>2</sub>SO<sub>4</sub>, filtrated and concentrated in vacuo. The crude product was purified by column chromatography (SiO<sub>2</sub>, petroleum ether/ethyl acetate = 1/100) to afford pyrrole **1e** (274 mg, 57% yield over two steps).

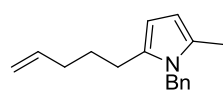

**1-Benzyl-2-methyl-5-(pent-4-en-1-yl)-1H-pyrrole (1e)**

Yellow liquid (274 mg, 92% yield), following silica gel column chromatography (ethyl acetate/petroleum ether = 1/100, v/v). Analytical data for **1e**: <sup>1</sup>H NMR (300 MHz, CDCl<sub>3</sub>) δ 1.60-1.70 (m, 2H), 2.05 (dt, *J*<sub>1</sub> = 6.9 Hz, *J*<sub>2</sub> = 7.8 Hz, 2H), 2.12 (s, 3H), 2.45 (t, *J* = 7.5 Hz, 2H), 4.92 (d, *J* = 10.2 Hz, 1H), 4.97 (d, *J* = 17.4 Hz, 1H), 5.01 (s, 2H), 5.71-5.80 (m, 1H), 5.89 (s, 2H), 6.86 (d, *J* = 7.5 Hz, 2H), 7.22-7.31 (m, 3H); <sup>13</sup>C NMR (75 MHz, CDCl<sub>3</sub>) δ 12.3, 26.0, 28.0, 33.3, 46.5, 104.5, 105.5, 114.6, 125.6, 127.0, 128.0, 128.7, 132.6, 138.5, 138.7; IR (film) 3102, 2930, 2859, 1640, 1495, 1416, 1354, 1299, 1029, 1018, 991, 910, 727, 695 cm<sup>-1</sup>; HRMS (ESI) exact mass calcd for C<sub>17</sub>H<sub>22</sub>N (M+H)<sup>+</sup> requires *m/z* 240.1747, found *m/z* 240.1749.

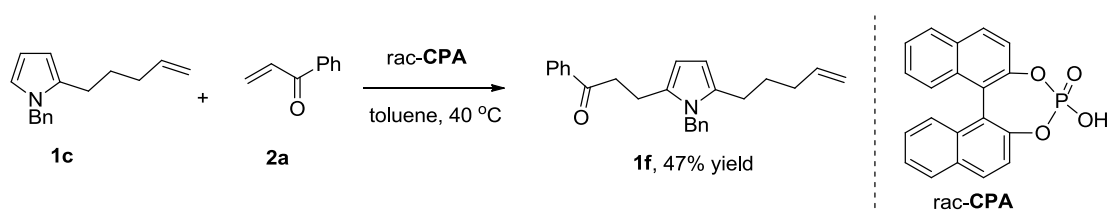

To a solution of **1c** (450 mg, 2 mmol) in toluene (10 mL) was added the enone **2a** (290 mg, 2.2 mmol) and racemic phosphoric acid (35 mg, 0.1 mmol, 5 mol%). The mixture was stirred at 40 °C for 12 hours. After the reaction was complete (monitored by TLC), the solvent was evaporated under reduced pressure. The crude product was purified by column chromatography (SiO<sub>2</sub>, petroleum ether/ethyl acetate = 1/50) to afford **1f** (187 mg, 47% yield).

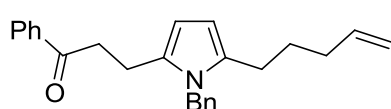

**3-(1-Benzyl-5-(pent-4-en-1-yl)-1H-pyrrol-2-yl)-1-phenylpropan-1-one (1f)**

Yellow solid (187 mg, 47% yield), following silica gel column chromatography (ethyl acetate/petroleum ether = 1/25, v/v). Analytical data for **1f**: m.p. = 58-59 °C; <sup>1</sup>H NMR (300 MHz, CDCl<sub>3</sub>) δ 1.62-1.72 (m, 2H), 2.08 (app q, *J* = 7.2 Hz, 2H), 2.47 (t, *J* = 7.5 Hz, 2H), 2.89 (t, *J* = 8.4 Hz, 2H), 3.18-3.23 (m, 2H), 4.92 (d, *J* = 9.3 Hz, 1H), 4.97 (d, *J* = 17.4 Hz, 1H), 5.08 (s, 2H), 5.69-5.82 (m, 1H), 5.93-5.96 (m, 2H), 6.86 (d, *J* = 7.2 Hz, 2H), 7.17-7.29 (m, 3H), 7.40 (t, *J* = 7.5 Hz, 2H), 7.52 (t, *J* = 7.2 Hz, 1H), 7.87 (d, *J* = 7.5 Hz, 2H); <sup>13</sup>C NMR (75 MHz, CDCl<sub>3</sub>) δ 20.8, 25.8, 27.8, 33.3, 37.7, 46.4, 104.4, 104.6, 114.7, 125.5, 127.0, 127.9, 128.4, 128.6, 131.2, 132.9, 136.6, 138.3, 138.4, 199.0; IR (film) 2928, 1682, 1494, 1418, 1351, 1273, 1193, 1006, 973, 909, 731, 697, 686, 642 cm<sup>-1</sup>; HRMS (ESI) exact mass calcd for C<sub>25</sub>H<sub>28</sub>NO(M+H)<sup>+</sup> requires *m/z* 358.2165, found *m/z* 358.2167.

**General procedure for preparation of 1g-i**

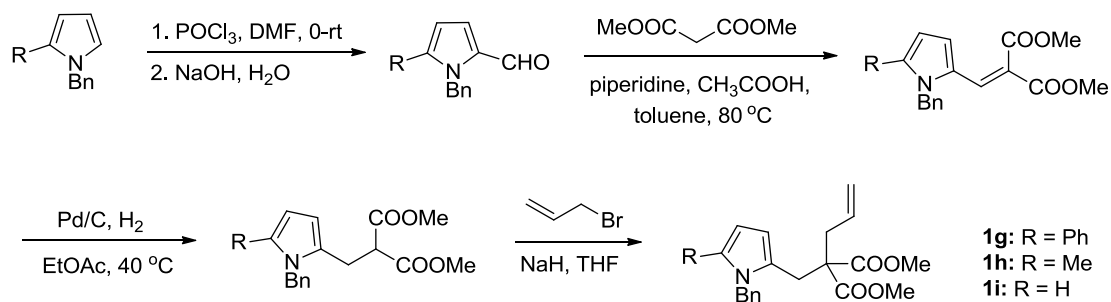

In a dry three-necked flask, POCl<sub>3</sub> (2.0 equiv.) was added to a solution of *N*-Bn pyrrole (1.0 equiv, 0.7 M) in DMF at 0 °C. After the mixture was stirred at room temperature for 4 hours, it was slowly adjusted by the addition of saturated NaOH (aq.) to pH >7 at 0 °C. Then the mixture was stirred at 80 °C for 2 hours. After the reaction was complete (monitored by TLC), the mixture was quenched with water and extracted with ethyl acetate. The organic layers were washed with brine, dried over anhydrous Na<sub>2</sub>SO<sub>4</sub> and filtered. After the solvent was removed in vacuo, the residue was purified by column chromatography (SiO<sub>2</sub>, petroleum ether/ethyl acetate = 1/100)

to afford pyrrole aldehyde.

The pyrrole aldehyde (1.0 equiv) was dissolved in toluene (0.3 mol/L) and methyl malonate (1.1 equivs), piperidine (1.0 equiv) and AcOH (0.1 equiv) were added. The mixture was stirred at 60 °C for 12 hours. After the reaction was complete (monitored by TLC), the solvent was evaporated under reduced pressure. The crude product was purified by column chromatography (SiO<sub>2</sub>, petroleum ether/ethyl acetate = 1/5) to afford dimethyl (pyrrol-methylene)malonate.

The mixture of dimethyl (pyrrol-methylene)malonate (1.0 equiv, 0.4 mol/L) and Pd/C (10%, 0.1 equiv.) in ethyl acetate under 1 atm of H<sub>2</sub> was stirred at 40 °C. After the reaction was complete (monitored by TLC), the reaction mixture was filtered through a pad of celite and washed with ethyl acetate. The solvent was evaporated under reduced pressure to afford the crude product, which was directly used in the next step.

To a suspension of NaH (3.0 equivs) in THF (0.3 M) in a dry three-necked flask was added the aforementioned product in THF (1 mol/L) slowly at 0 °C. The mixture was stirred at room temperature for 1 hour. After allyl bromide (1.5 equivs) was added at 0 °C, the reaction was stirred at room temperature. When the reaction was complete (monitored by TLC), it was quenched with water at 0 °C and extracted with ethyl acetate. The organic layers were washed with brine, dried over anhydrous Na<sub>2</sub>SO<sub>4</sub> and filtered. After the solvent was removed in vacuo, the crude product was purified by column chromatography (SiO<sub>2</sub>, petroleum ether/ethyl acetate = 1/20) to afford **1**.

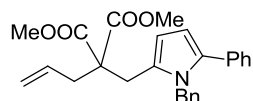

**Dimethyl 2-allyl-2-((1-benzyl-1H-pyrrol-2-yl)methyl) malonate (1g)**

White solid (1.3 g, 40% yield over four steps), following silica gel column chromatography (ethyl acetate/petroleum ether = 1/20, v/v). Analytical data for **1g**: m.p. = 85-86°C; <sup>1</sup>H NMR (300 MHz, CDCl<sub>3</sub>) δ 2.77 (d, *J* = 7.2 Hz, 2H), 3.13 (s, 2H), 3.69 (s, 6H), 5.02 (d, *J* = 10.8 Hz, 1H), 5.03 (d, *J* = 16.2 Hz, 1H), 5.05 (s, 2H), 5.50-5.61 (m, 1H), 6.03 (d, *J* = 3.6 Hz, 1H), 6.21 (d, *J* = 3.3 Hz, 1H), 6.79 (d, *J* = 6.9



Hz, 2H), 7.15-7.27 (m, 8H);  $^{13}\text{C}$  NMR (75 MHz,  $\text{CDCl}_3$ )  $\delta$  29.4, 37.1, 47.4, 52.5, 58.0, 108.3, 108.7, 119.1, 125.5, 126.9, 127.0, 128.2, 128.3, 128.7, 128.9, 132.5, 133.6, 135.2, 138.9, 171.3; IR (film) 2923, 2853, 1731, 1438, 1295, 1204, 1060, 1027, 943, 756, 738, 700  $\text{cm}^{-1}$ ; HRMS (ESI) exact mass calcd for  $\text{C}_{26}\text{H}_{28}\text{NO}_4(\text{M}+\text{H})^+$  requires  $m/z$  418.2013, found  $m/z$  418.1997.

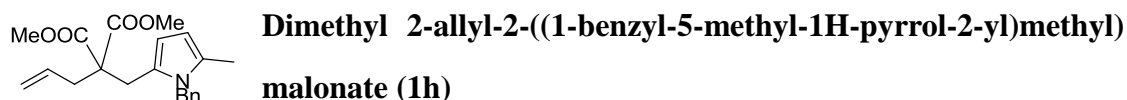

White solid (36% yield over four steps), following silica gel column chromatography (ethyl acetate/petroleum ether = 1/20, v/v). Analytical data for **1h**: m.p. = 51-52  $^{\circ}\text{C}$ ;  $^1\text{H}$  NMR (300 MHz,  $\text{CDCl}_3$ )  $\delta$  2.10 (s, 3H), 2.73 (d,  $J = 7.2$  Hz, 2H), 3.14 (s, 2H), 3.68 (s, 6H), 5.00-5.05 (m, 2H), 5.03 (s, 2H), 5.53-5.59 (m, 1H), 5.85-5.88 (m, 2H), 6.89 (d,  $J = 7.2$  Hz, 2H), 7.21-7.30 (m, 3H);  $^{13}\text{C}$  NMR (75 MHz,  $\text{CDCl}_3$ )  $\delta$  12.5, 29.2, 36.9, 46.4, 52.4, 58.0, 106.3, 106.8, 119.0, 125.5, 125.9, 127.0, 128.7, 132.5, 138.4, 171.3; IR (film) 2952, 1729, 1438, 1301, 1198, 1155, 1067, 1027, 1001, 934, 861, 748, 730, 695, 671  $\text{cm}^{-1}$ ; HRMS (ESI) exact mass calcd for  $\text{C}_{21}\text{H}_{26}\text{NO}_4(\text{M}+\text{H})^+$  requires  $m/z$  356.1856, found  $m/z$  356.1845.

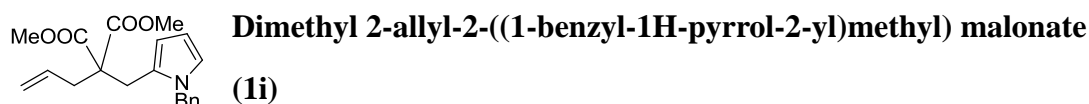

Colourless liquid (2.8 g, 23% yield over four steps), following silica gel column chromatography (ethyl acetate/petroleum ether = 1/20, v/v). Analytical data for **1i**:  $^1\text{H}$  NMR (300 MHz,  $\text{CDCl}_3$ )  $\delta$  2.71 (d,  $J = 7.2$  Hz, 2H), 3.14 (s, 2H), 3.68 (s, 6H), 4.99-5.04 (m, 2H), 5.05 (s, 2H), 5.54-5.63 (m, 1H), 5.93 (d,  $J = 1.8$  Hz, 2H), 6.10-6.12 (m, 1H), 6.60 (dd,  $J_1 = 1.8$  Hz,  $J_2 = 2.7$  Hz, 1H), 6.93 (d,  $J = 6.9$  Hz, 2H), 7.23-7.32 (m, 3H);  $^{13}\text{C}$  NMR (75 MHz,  $\text{CDCl}_3$ )  $\delta$  28.7, 36.9, 50.2, 52.5, 58.1, 107.5, 108.2, 119.1, 121.7, 126.2, 126.7, 127.3, 128.6, 132.4, 138.3, 171.2; IR (film) 2981, 1731, 1480, 1434, 1292, 1211, 1136, 1075, 923, 705  $\text{cm}^{-1}$ ; HRMS (ESI) exact mass calcd for  $\text{C}_{20}\text{H}_{24}\text{NO}_4(\text{M}+\text{H})^+$  requires  $m/z$  342.1700, found  $m/z$  342.1691.

## General procedure for the enantioselective synthesis of 4,5,6,7-tetrahydroindole

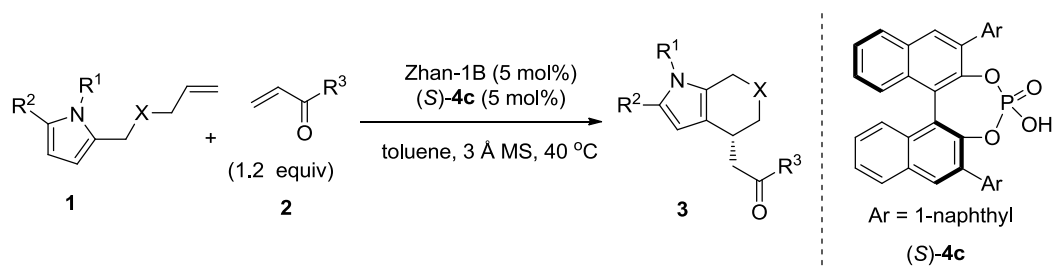

To a solution of pyrrole olefin **1** (0.2 mmol, 1.0 equiv) in toluene (2 mL) were added enone **2** (1.2 equivs or 2.0 equivs) and 3 Å MS (100 mg), then chiral phosphoric acid (S)-**4c** (6.0 mg, 0.01 mmol, 5 mol%) and Zhan-1B (7.3 mg, 0.01 mmol, 5 mol%) were added in one portion. The reaction was stirred at 40 °C. After the reaction was complete (monitored by TLC), it was quenched with water and extracted with ethyl acetate. The organic layers were washed with brine, dried over anhydrous Na<sub>2</sub>SO<sub>4</sub> and filtered. After the solvent was removed in vacuo, the crude product was purified by silica gel column chromatography (ethyl acetate/petroleum ether = 1/25 - 1/9) to afford tetrahydroindole **3**

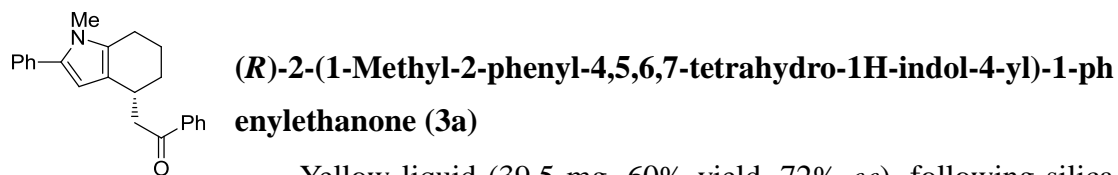

Yellow liquid (39.5 mg, 60% yield, 72% *ee*), following silica gel column chromatography (ethyl acetate/petroleum ether = 1/30, v/v). Analytical data for **3a**:  $[\alpha]_D^{20} = +29.2$  (c = 0.5 Acetone, 72% *ee*). <sup>1</sup>H NMR (300 MHz, CDCl<sub>3</sub>) δ 1.40-1.50 (m, 1H), 1.79-1.88 (m, 1H), 1.97-2.04 (m, 2H), 2.61 (t, *J* = 6.0 Hz, 2H), 3.09 (dd, *J*<sub>1</sub> = 8.1 Hz, *J*<sub>2</sub> = 15.9 Hz, 1H), 3.35-3.49 (m, 2H), 3.49 (s, 3H), 6.07 (s, 1H), 7.23-7.30 (m, 1H), 7.33-7.38 (m, 4H), 7.43-7.48 (m, 2H), 7.55 (t, *J* = 7.2 Hz, 1H), 8.01 (d, *J* = 7.2 Hz, 2H); <sup>13</sup>C NMR (75 MHz, CDCl<sub>3</sub>) δ 21.6, 22.3, 29.8, 30.0, 31.3, 45.5, 105.7, 120.7, 126.4, 128.1, 128.3, 128.5, 130.0, 132.9, 133.4, 133.5, 137.4, 200.0; IR (film) 2923, 2852, 1680, 1599, 1515, 1447, 1357, 1277, 1201, 988, 751, 689 cm<sup>-1</sup>; HRMS (ESI) exact mass calcd for C<sub>23</sub>H<sub>24</sub>NO (M+H)<sup>+</sup> requires *m/z* 330.1852, found *m/z* 330.1856. The enantiomeric excess was determined by Daicel Chiralpak AD-H (25 cm), Hexanes / IPA = 90 / 10, 1.0 mL/min, λ = 254 nm, t (major)

= 7.63 min, t (minor) = 6.99 min.

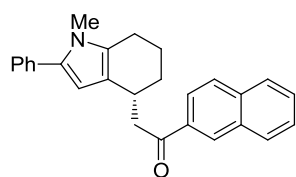

**(R)-2-(1-Methyl-2-phenyl-4,5,6,7-tetrahydro-1H-indol-4-yl)-1-(naphthalen-2-yl)ethanone (3b)**

Yellow solid (33.7 mg, 44% yield, 67% *ee*), following silica gel column chromatography (ethyl acetate/petroleum ether = 1/35, v/v). Analytical data for **3b**: m.p. = 55-56 °C;  $[\alpha]_D^{20} = +89.7$  (c = 0.5 Acetone, 67% *ee*).  $^1\text{H}$  NMR (300 MHz,  $\text{CDCl}_3$ )  $\delta$  1.34-1.53 (m, 1H), 1.74-1.79 (m, 1H), 1.91-2.00 (m, 2H), 2.52-2.56 (m, 2H), 3.15 (dd,  $J_1 = 9.9$  Hz,  $J_2 = 17.4$  Hz, 1H), 3.42-3.47 (m, 2H), 3.42 (s, 3H), 6.03 (s, 1H), 7.15-7.20 (m, 1H), 7.25-7.30 (m, 4H), 7.43-7.53 (m, 2H), 7.77-7.87 (m, 3H), 8.01 (d,  $J = 7.8$  Hz, 1H), 8.44 (s, 1H);  $^{13}\text{C}$  NMR (75 MHz,  $\text{CDCl}_3$ )  $\delta$  21.7, 22.3, 29.9, 30.2, 31.3, 45.6, 105.7, 120.8, 124.0, 126.4, 126.7, 127.7, 128.3, 128.4, 128.5, 129.6, 129.8, 130.0, 132.5, 133.4, 133.6, 134.8, 135.5, 200.0; IR (film) 3056, 2922, 2851, 1674, 1626, 1599, 1514, 1467, 1358, 1280, 1178, 1122, 861, 818, 750, 699  $\text{cm}^{-1}$ ; HRMS (ESI) exact mass calcd for  $\text{C}_{27}\text{H}_{26}\text{NO}(\text{M}+\text{H})^+$  requires  $m/z$  380.2009, found  $m/z$  380.2008. The enantiomeric excess was determined by Daicel Chiralpak AD-H (25 cm), Hexanes / IPA = 90 / 10, 1.0 mL/min,  $\lambda = 254$  nm, t (major) = 11.24 min, t (minor) = 10.28 min.

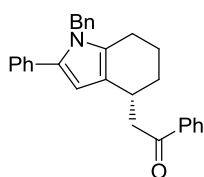

**(R)-2-(1-Benzyl-2-phenyl-4,5,6,7-tetrahydro-1H-indol-4-yl)-1-phenylethanone (3c)**

Yellow solid (75.2 mg, 93% yield, 84% *ee*), following silica gel column chromatography (ethyl acetate/petroleum ether = 1/30, v/v). Analytical data for **3c**: m.p. = 104-105 °C;  $[\alpha]_D^{20} = +21.5$  (c = 0.5 Acetone, 84% *ee*).  $^1\text{H}$  NMR (300 MHz,  $\text{CDCl}_3$ )  $\delta$  1.42-1.45 (m, 1H), 1.70-1.77 (m, 1H), 1.86-2.02 (m, 2H), 2.37-2.41 (m, 2H), 3.10 (dd,  $J_1 = 8.1$  Hz,  $J_2 = 15.9$  Hz, 1H), 3.39-3.46 (m, 2H), 5.09 (s, 2H), 6.14 (s, 1H), 6.96 (d,  $J = 7.2$  Hz, 2H), 7.22-7.33 (m, 8H), 7.47 (t,  $J = 7.5$  Hz, 2H), 7.56 (t,  $J = 6.9$  Hz, 1H), 8.03 (d,  $J = 7.5$  Hz, 2H);  $^{13}\text{C}$  NMR (75 MHz,  $\text{CDCl}_3$ )  $\delta$  21.6, 22.2, 29.9, 30.1, 45.6, 47.4, 106.3, 121.3, 125.7, 126.5, 126.9, 128.1, 128.3, 128.4, 128.5, 128.6, 129.9, 132.8, 133.5, 133.8, 137.4, 139.0, 200.1; IR (film) 3028, 2916, 1686, 1598, 1494, 1447, 1401, 1358, 1199, 1027, 990, 918, 794, 761, 742,

685, 624  $\text{cm}^{-1}$ ; HRMS (ESI) exact mass calcd for  $\text{C}_{29}\text{H}_{28}\text{NO}$  ( $\text{M}+\text{H}$ )<sup>+</sup> requires  $m/z$  406.2165, found  $m/z$  406.2170. The enantiomeric excess was determined by Daicel Chiralpak AD-H (25 cm), Hexanes / IPA = 90 / 10, 0.5 mL/min,  $\lambda$  = 254 nm,  $t$  (major) = 14.52 min,  $t$  (minor) = 15.40 min.

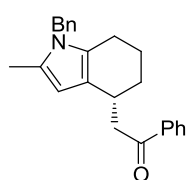

**(R)-2-(1-Benzyl-2-methyl-4,5,6,7-tetrahydro-1H-indol-4-yl)-1-phenylethanone (3d)**

Yellow solid (38.6 mg, 56% yield, 84% *ee*), following silica gel column chromatography (ethyl acetate/petroleum ether = 1/30, v/v).

Analytical data for **3d**: m.p. = 50-51 °C;  $[\alpha]_{\text{D}}^{20}$  = +0.9 ( $c$  = 0.5 Acetone, 84% *ee*). <sup>1</sup>H NMR (300 MHz,  $\text{CDCl}_3$ )  $\delta$  1.34-1.44 (m, 1H), 1.68-1.77 (m, 1H), 1.87-1.99 (m, 2H), 2.12 (s, 3H), 2.38-2.41 (m, 2H), 3.04 (dd,  $J_1$  = 8.4 Hz,  $J_2$  = 15.6 Hz, 1H), 3.32-3.38 (m, 2H), 4.95 (s, 2H), 5.79 (s, 1H), 6.91 (d,  $J$  = 7.2 Hz, 2H), 7.20-7.32 (m, 3H), 7.46 (t,  $J$  = 7.8 Hz, 2H), 7.53-7.58 (m, 1H), 8.02 (d,  $J$  = 7.5 Hz, 2H); <sup>13</sup>C NMR (75 MHz,  $\text{CDCl}_3$ )  $\delta$  12.0, 21.7, 22.0, 30.0, 30.1, 45.7, 46.5, 103.9, 119.7, 125.8, 126.9, 127.3, 128.1, 128.5, 128.6, 132.8, 137.4, 138.5, 200.2; IR (film) 2923, 2853, 1679, 1597, 1447, 1355, 1276, 1205, 1000, 752, 728, 690  $\text{cm}^{-1}$ ; HRMS (ESI) exact mass calcd for  $\text{C}_{24}\text{H}_{26}\text{NO}$  ( $\text{M}+\text{H}$ )<sup>+</sup> requires  $m/z$  344.2009, found  $m/z$  344.2016. The enantiomeric excess was determined by Daicel Chiralpak AD-H (25 cm), Hexanes / IPA = 90 / 10, 1.0 mL/min,  $\lambda$  = 254 nm,  $t$  (major) = 27.66 min,  $t$  (minor) = 20.06 min.

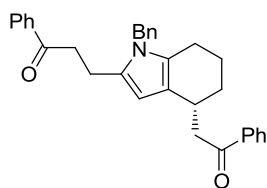

**(R)-3-(1-Benzyl-4-(2-oxo-2-phenylethyl)-4,5,6,7-tetrahydro-1H-indol-2-yl)-1-phenylpropan-1-one (3e)**

Yellow solid (81.7 mg, 88% yield, 80% *ee*), following silica gel column chromatography (ethyl acetate/petroleum

ether = 1/10, v/v). Analytical data for **3e**: m.p. = 102-103 °C;  $[\alpha]_{\text{D}}^{20}$  = +15.2 ( $c$  = 0.5 Acetone, 80% *ee*). <sup>1</sup>H NMR (300 MHz,  $\text{CDCl}_3$ )  $\delta$  1.40-1.43 (m, 1H), 1.74-1.77 (m, 1H), 1.87-2.00 (m, 2H), 2.42-2.46 (m, 2H), 2.86-2.91 (m, 2H), 3.05 (dd,  $J_1$  = 7.8 Hz,  $J_2$  = 15.3 Hz, 1H), 3.13-3.18 (m, 2H), 3.33-3.42 (m, 2H), 5.02 (s, 2H), 5.83 (s, 1H), 6.92 (d,  $J$  = 6.9 Hz, 2H), 7.19-7.32 (m, 3H), 7.39-7.58 (m, 6H), 7.85 (d,  $J$  = 7.2 Hz, 2H), 8.01 (d,  $J$  = 6.9 Hz, 2H); <sup>13</sup>C NMR (75 MHz,  $\text{CDCl}_3$ )  $\delta$  20.7, 21.6, 21.9, 30.1,

30.2, 38.0, 45.7, 46.4, 103.1, 119.9, 125.7, 127.0, 127.8, 127.9, 128.2, 128.5, 128.7, 130.7, 132.8, 133.0, 136.7, 137.5, 138.5, 199.1, 200.2; IR (film) 2927, 1678, 1597, 1448, 1351, 1298, 1284, 1204, 1179, 973, 755, 726, 692  $\text{cm}^{-1}$ ; HRMS (ESI) exact mass calcd for  $\text{C}_{33}\text{H}_{32}\text{NO}_2$  ( $\text{M}+\text{H}$ )<sup>+</sup> requires  $m/z$  462.2428, found  $m/z$  462.2430. The enantiomeric excess was determined by Daicel Chiralpak AD-H (25 cm), Hexanes / IPA = 90 / 10, 1.0 mL/min,  $\lambda$  = 254 nm,  $t$  (major) = 25.34 min,  $t$  (minor) = 18.36 min.

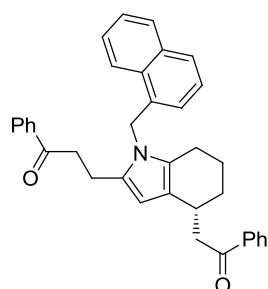

**(R)-3-(1-(Naphthalen-1-ylmethyl)-4-(2-oxo-2-phenylethyl)-4,5,6,7-tetrahydro-1H-indol-2-yl)-1-phenylpropan-1-one (3f)**

Yellow solid (75.7 mg, 74% yield, 82% *ee*), following silica gel column chromatography (ethyl acetate/petroleum ether = 1/10, v/v). Analytical data for **3f**: m.p. = 96-97 °C;  $[\alpha]_{\text{D}}^{20} = +3.6$  ( $c = 0.5$  Acetone, 82% *ee*).  $^1\text{H}$  NMR (300 MHz,  $\text{CDCl}_3$ )  $\delta$  1.43-1.46 (m, 1H), 1.67-1.75 (m, 1H), 1.85-1.89 (m, 1H), 1.98-2.04 (m, 1H), 2.38-2.42 (m, 2H), 2.85-2.91 (m, 2H), 3.08 (dd,  $J_1 = 7.8$  Hz,  $J_2 = 15.6$  Hz, 1H), 3.20 (t,  $J = 7.2$  Hz, 2H), 3.38-3.47 (m, 2H), 5.47 (s, 2H), 5.92 (s, 1H), 6.40 (d,  $J = 6.9$  Hz, 1H), 7.34 (t,  $J = 7.5$  Hz, 3H), 7.45-7.61 (m, 6H), 7.72-7.80 (m, 3H), 7.89 (d,  $J = 7.5$  Hz, 1H), 7.99-8.05 (m, 3H);  $^{13}\text{C}$  NMR (75 MHz,  $\text{CDCl}_3$ )  $\delta$  20.6, 21.6, 30.1, 30.2, 38.0, 44.2, 45.7, 103.3, 120.1, 122.1, 122.4, 125.7, 125.8, 126.3, 127.5, 127.9, 128.1, 128.2, 128.4, 128.5, 128.9, 130.1, 130.9, 132.8, 132.9, 133.4, 133.8, 136.6, 137.5, 199.0, 200.3; IR (film) 2930, 1735, 1681, 1596, 1447, 1359, 1278, 1203, 973, 795, 771, 749, 690  $\text{cm}^{-1}$ ; HRMS (ESI) exact mass calcd for  $\text{C}_{36}\text{H}_{34}\text{NO}_2$  ( $\text{M}+\text{H}$ )<sup>+</sup> requires  $m/z$  512.2584, found  $m/z$  512.2582. The enantiomeric excess was determined by Daicel Chiralpak AD-H (25 cm), Hexanes / IPA = 90 / 10, 1.0 mL/min,  $\lambda$  = 254 nm,  $t$  (major) = 25.36 min,  $t$  (minor) = 20.16 min.

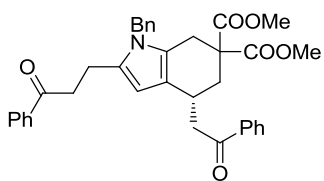

**(R)-Dimethyl 1-benzyl-4-(2-oxo-2-phenylethyl)-2-(3-oxo-3-phenylpropyl)-4,5-dihydro-1H-indole-6,6(7H)-dicarboxylate (3g)**

Yellow solid (56.6 mg, 49% yield, 85% *ee*), following silica gel column chromatography (ethyl acetate/petroleum ether = 1/5, v/v). Analytical data for **3g**: m.p. = 62-63 °C;  $[\alpha]_D^{20} = +30.3$  (c = 0.5 Acetone, 85% *ee*).  $^1\text{H}$  NMR (300 MHz,  $\text{CDCl}_3$ )  $\delta$  1.80 (dd,  $J_1 = 10.8$  Hz,  $J_2 = 12.0$  Hz, 1H), 2.60-2.75 (m, 4H), 2.80-2.89 (m, 3H), 3.01-3.13 (m, 2H), 3.66-3.68 (m, 1H), 3.69 (s, 6H), 5.05 (s, 2H), 5.75 (s, 1H), 6.97 (d,  $J = 7.5$  Hz, 2H), 7.20-7.33 (m, 3H), 7.38-7.59 (m, 6H), 7.81 (d,  $J = 8.1$  Hz, 2H), 8.00 (d,  $J = 8.4$  Hz, 2H);  $^{13}\text{C}$  NMR (75 MHz,  $\text{CDCl}_3$ )  $\delta$  20.5, 27.5, 27.9, 35.7, 37.8, 45.5, 46.6, 52.7, 52.8, 54.4, 102.9, 118.4, 124.2, 125.8, 127.2, 127.9, 128.1, 128.4, 128.5, 128.7, 131.8, 132.9, 133.0, 136.6, 137.2, 138.0, 170.7, 172.1, 199.0, 199.3; IR (film) 3674, 2988, 2901, 1732, 1681, 1448, 1250, 1205, 1066, 733, 690  $\text{cm}^{-1}$ ; HRMS (ESI) exact mass calcd for  $\text{C}_{36}\text{H}_{36}\text{NO}_6(\text{M}+\text{H})^+$  requires  $m/z$  578.2537, found  $m/z$  578.2535. The enantiomeric excess was determined by Phenomenex Lu X 5u Cellulose-2 (0.46cm x 25 cm), Hexanes / IPA = 70 / 30, 0.7 mL/min,  $\lambda = 214$  nm,  $t$  (major) = 49.54 min,  $t$  (minor) = 59.21 min

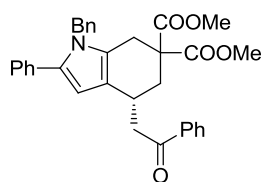

**(R)-Dimethyl 1-benzyl-4-(2-oxo-2-phenylethyl)-2-phenyl-4,5-dihydro-1H-indole-6,6(7H)-dicarboxylate (3h)**

Yellow solid (61.2 mg, 59% yield, 92% *ee*), following silica gel column chromatography (ethyl acetate/petroleum ether = 1/10, v/v). Analytical data for **3h**: m.p. = 60-61 °C;  $[\alpha]_D^{20} = +52.8$  (c = 0.5 Acetone, 92% *ee*).  $^1\text{H}$  NMR (300 MHz,  $\text{CDCl}_3$ )  $\delta$  1.85 (dd,  $J_1 = 10.5$  Hz,  $J_2 = 13.2$  Hz, 1H), 2.74 (dd,  $J_1 = 4.8$  Hz,  $J_2 = 13.2$  Hz, 1H), 2.80 (AB,  $J = 16.2$  Hz, 1H), 3.10 (dd,  $J_1 = 7.5$  Hz,  $J_2 = 16.5$  Hz, 1H), 3.25 (AB,  $J = 15.6$  Hz, 1H), 3.43-3.58 (m, 2H), 3.66 (s, 3H), 3.67 (s, 3H), 5.10 (s, 2H), 6.07 (s, 1H), 6.99 (d,  $J = 7.5$  Hz, 2H), 7.17-7.35 (m, 8H), 7.44-7.49 (m, 2H), 7.56 (t,  $J = 7.5$  Hz, 1H), 8.02 (d,  $J = 8.7$  Hz, 2H);  $^{13}\text{C}$  NMR (75 MHz,  $\text{CDCl}_3$ )  $\delta$  27.4, 28.0, 35.6, 45.4, 47.5, 52.7, 52.8, 54.4, 105.9, 119.8, 125.7, 126.3, 126.7, 127.0, 128.1, 128.3, 128.5, 128.6, 128.7, 133.0, 133.1, 134.8, 137.1, 138.5, 170.7, 172.1, 199.1; IR (film) 2951, 1731, 1682, 1599, 1448, 1356, 1247, 1075,

757, 730, 691  $\text{cm}^{-1}$ ; HRMS (ESI) exact mass calcd for  $\text{C}_{33}\text{H}_{32}\text{NO}_5(\text{M}+\text{H})^+$  requires  $m/z$  552.2275, found  $m/z$  552.2269. The enantiomeric excess was determined by Daicel Chiralpak AD-H (25 cm), Hexanes / IPA = 95 / 5, 0.8 mL/min,  $\lambda$  = 254 nm,  $t$  (major) = 60.75 min,  $t$  (minor) = 69.06 min.

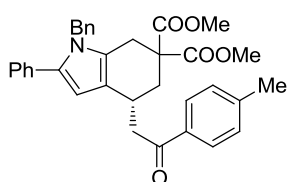

**(R)-Dimethyl 1-benzyl-4-(2-oxo-2-(p-tolyl)ethyl)-2-phenyl-4,5-dihydro-1H-indole-6,6(7H)-dicarboxylate (3i)**

Yellow solid (63.9 mg, 60% yield, 90% *ee*), following silica gel column chromatography (ethyl acetate/petroleum ether = 1/10, v/v). Analytical data for **3i**: m.p. = 59-60  $^{\circ}\text{C}$ ;  $[\alpha]_{\text{D}}^{20}$  = +47.9 ( $c$  = 0.5 Acetone, 90% *ee*).  $^1\text{H}$  NMR (300 MHz,  $\text{CDCl}_3$ )  $\delta$  1.75-1.88 (m, 1H), 2.40 (s, 3H), 2.70-2.82 (m, 2H), 3.07 (dd,  $J_1$  = 7.5 Hz,  $J_2$  = 16.5 Hz, 1H), 3.25 (d,  $J$  = 15.9 Hz, 1H), 3.40-3.57 (m, 2H), 3.66 (s, 3H), 3.67 (s, 3H), 5.09 (s, 2H), 6.06 (s, 1H), 6.99 (d,  $J$  = 7.2 Hz, 2H), 7.18-7.34 (m, 10H), 7.91 (d,  $J$  = 8.4 Hz, 2H);  $^{13}\text{C}$  NMR (75 MHz,  $\text{CDCl}_3$ )  $\delta$  21.6, 27.4, 28.0, 35.6, 45.2, 47.5, 52.6, 52.7, 54.4, 105.9, 119.9, 125.7, 126.2, 126.7, 127.0, 128.1, 128.2, 128.4, 128.6, 129.2, 133.1, 134.7, 134.8, 138.5, 143.7, 170.7, 172.1, 198.7; IR (film) 2952, 1731, 1679, 1433, 1246, 1201, 1176, 813, 758, 731, 697  $\text{cm}^{-1}$ ; HRMS (ESI) exact mass calcd for  $\text{C}_{34}\text{H}_{34}\text{NO}_5(\text{M}+\text{H})^+$  requires  $m/z$  536.2431, found  $m/z$  536.2433. The enantiomeric excess was determined by Daicel Chiralpak AD-H (25 cm), Hexanes / IPA = 90 / 10, 1.0 mL/min,  $\lambda$  = 254 nm,  $t$  (major) = 33.7 min,  $t$  (minor) = 39.91 min.

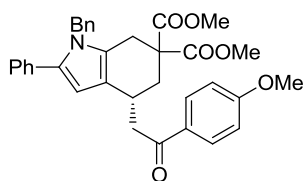

**(R)-Dimethyl 1-benzyl-4-(2-(4-methoxyphenyl)-2-oxoethyl)-2-phenyl-4,5-dihydro-1H-indole-6,6(7H)-dicarboxylate (3j)**

Yellow solid (62.3 mg, 57% yield, 88% *ee*), following silica gel column chromatography (ethyl acetate/petroleum ether = 1/10, v/v). Analytical data for **3j**: m.p. = 56-57  $^{\circ}\text{C}$ ;  $[\alpha]_{\text{D}}^{20}$  = +37.8 ( $c$  = 0.5 Acetone, 88% *ee*).  $^1\text{H}$  NMR (300 MHz,  $\text{CDCl}_3$ )  $\delta$  1.80-1.88 (m, 1H), 2.70-2.82 (m, 2H), 3.01-3.09 (m, 1H), 3.25 (d,  $J$  = 15.3 Hz, 1H), 3.06 (dd,  $J_1$  = 5.4 Hz,  $J_2$  = 16.5 Hz, 1H), 3.53-3.68 (m, 1H), 3.67 (s, 3H), 3.68 (s, 3H), 3.88 (s, 3H), 5.10 (s, 2H), 6.06 (s, 1H), 6.95 (d,  $J$  = 8.7 Hz,

2H), 7.01 (d,  $J = 8.1$  Hz, 2H), 7.23-7.36 (m, 8H), 8.01 (d,  $J = 9.0$  Hz, 2H);  $^{13}\text{C}$  NMR (75 MHz,  $\text{CDCl}_3$ )  $\delta$  27.5, 28.0, 35.6, 44.9, 47.4, 52.6, 52.7, 54.4, 55.3, 105.9, 113.6, 119.9, 125.6, 126.2, 126.6, 127.0, 128.2, 128.4, 128.6, 128.8, 130.3, 133.1, 134.7, 138.5, 163.3, 170.6, 172.1, 197.6; IR (film) 3700, 2954, 2902, 1731, 1674, 1599, 1511, 1451, 1435, 1251, 1205, 1168, 1075, 1029, 982, 831, 759, 730, 698  $\text{cm}^{-1}$ ; HRMS (ESI) exact mass calcd for  $\text{C}_{34}\text{H}_{34}\text{NO}_6(\text{M}+\text{H})^+$  requires  $m/z$  552.2381, found  $m/z$  552.2378. The enantiomeric excess was determined by Daicel Chiralpak AD-H (25 cm), Hexanes / IPA = 90 / 10, 1.0 mL/min,  $\lambda = 254$  nm,  $t$  (major) = 56.37 min,  $t$  (minor) = 65.28 min.

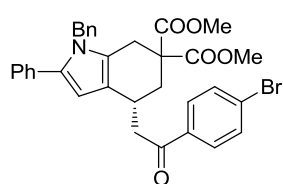

**(R)-Dimethyl 1-benzyl-4-(2-(4-bromophenyl)-2-oxoethyl)-2-phenyl-4,5-dihydro-1H-indole-6,6(7H)-dicarboxylate (3k)**

Yellow solid (90.8 mg, 76% yield, 93% *ee*), following silica gel column chromatography (ethyl acetate/petroleum ether = 1/10, v/v). Analytical data for **3k**: m.p. = 68-69 °C;  $[\alpha]_{\text{D}}^{20} = +51.6$  ( $c = 0.5$  Acetone, 93% *ee*).  $^1\text{H}$  NMR (300 MHz,  $\text{CDCl}_3$ )  $\delta$  1.83 (dd,  $J_1 = 10.8$  Hz,  $J_2 = 12.9$  Hz, 1H), 2.69-2.82 (m, 2H), 3.06 (dd,  $J_1 = 7.5$  Hz,  $J_2 = 17.1$  Hz, 1H), 3.25 (d,  $J = 16.2$  Hz, 1H), 3.42 (dd,  $J_1 = 5.7$  Hz,  $J_2 = 17.1$  Hz, 1H), 3.53-3.54 (m, 1H), 3.67 (s, 3H), 3.68 (s, 3H), 5.09 (s, 2H), 6.02 (s, 1H), 6.99 (d,  $J = 7.2$  Hz, 2H), 7.20-7.35 (m, 8H), 7.61 (d,  $J = 8.7$  Hz, 2H), 7.87 (d,  $J = 8.7$  Hz, 2H);  $^{13}\text{C}$  NMR (75 MHz,  $\text{CDCl}_3$ )  $\delta$  27.4, 28.0, 35.5, 45.3, 47.5, 52.7, 52.8, 54.4, 105.8, 119.6, 125.7, 126.3, 126.8, 127.1, 128.2, 128.3, 128.5, 128.7, 129.6, 131.9, 133.0, 134.9, 135.8, 138.5, 170.6, 172.1, 198.1; IR (film) 2928, 1729, 1680, 1434, 1247, 1205, 1173, 731, 697  $\text{cm}^{-1}$ ; HRMS (ESI) exact mass calcd for  $\text{C}_{33}\text{H}_{31}\text{BrNO}_5(\text{M}+\text{H})^+$  requires  $m/z$  600.1380, found  $m/z$  600.1379. The enantiomeric excess was determined by Daicel Chiralcel OD-H (25 cm), Hexanes / IPA = 95 / 5, 0.8 mL/min,  $\lambda = 254$  nm,  $t$  (major) = 75.35 min,  $t$  (minor) = 66.30 min.



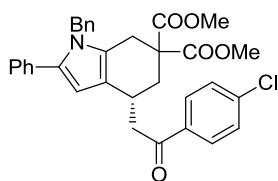

**(R)-Dimethyl 1-benzyl-4-(2-(4-chlorophenyl)-2-oxoethyl)-2-phenyl-4,5-dihydro-1H-indole-6,6(7H)-dicarboxylate (31)**

Yellow solid (75.8 mg, 68% yield, 91% *ee*), following silica gel column chromatography (ethyl acetate/petroleum ether = 1/10, v/v). Analytical data for **31**: m.p. = 72-73 °C;  $[\alpha]_D^{20} = +52.1$  (c = 0.5 Acetone, 91% *ee*).  $^1\text{H}$  NMR (300 MHz,  $\text{CDCl}_3$ )  $\delta$  1.83 (dd,  $J_1 = 8.1$  Hz,  $J_2 = 12.9$  Hz, 1H), 2.69-2.82 (m, 2H), 3.07 (dd,  $J_1 = 7.8$  Hz,  $J_2 = 17.1$  Hz, 1H), 3.25 (d,  $J = 16.2$  Hz, 1H), 3.43 (dd,  $J_1 = 5.7$  Hz,  $J_2 = 16.8$  Hz, 1H), 3.53-3.57 (m, 1H), 3.66 (s, 3H), 3.67 (s, 3H), 5.10 (s, 2H), 6.03 (s, 1H), 6.99 (d,  $J = 7.5$  Hz, 2H), 7.19-7.27 (m, 6H), 7.33 (t,  $J = 7.2$  Hz, 2H), 7.44 (d,  $J = 8.4$  Hz, 2H), 7.95 (d,  $J = 8.7$  Hz, 2H);  $^{13}\text{C}$  NMR (75 MHz,  $\text{CDCl}_3$ )  $\delta$  27.4, 28.0, 35.5, 45.3, 47.5, 52.7, 52.8, 54.4, 105.8, 119.6, 125.6, 126.2, 126.8, 127.0, 128.3, 128.4, 128.6, 128.8, 129.5, 133.0, 134.9, 135.4, 138.4, 139.4, 170.6, 172.0, 197.9; IR (film) 2951, 1731, 1683, 1587, 1433, 1397, 1247, 1200, 1174, 1089, 983, 817, 759, 731, 698  $\text{cm}^{-1}$ ; HRMS (ESI) exact mass calcd for  $\text{C}_{33}\text{H}_{31}\text{ClNO}_5(\text{M}+\text{H})^+$  requires  $m/z$  556.1885, found  $m/z$  556.1880. The enantiomeric excess was determined by Daicel Chiralpak AD-H (25 cm), Hexanes / IPA = 95 / 5, 1.0 mL/min,  $\lambda = 254$  nm,  $t$  (major) = 74.39 min,  $t$  (minor) = 80.71 min.

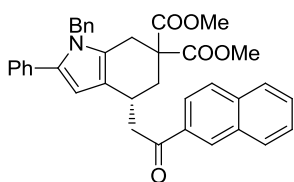

**(R)-Dimethyl 1-benzyl-4-(2-(naphthalen-2-yl)-2-oxoethyl)-2-phenyl-4,5-dihydro-1H-indole-6,6(7H)-dicarboxylate (3m)**

Yellow solid (58.0 mg, 51% yield, 90% *ee*), following silica gel column chromatography (ethyl acetate/petroleum ether = 1/10, v/v). Analytical data for **3m**: m.p. = 63-64 °C;  $[\alpha]_D^{20} = +58.7$  (c = 0.5 Acetone, 90% *ee*).  $^1\text{H}$  NMR (300 MHz,  $\text{CDCl}_3$ )  $\delta$  1.85-1.93 (m, 1H), 2.76-2.84 (m, 2H), 3.20-3.30 (m, 2H), 3.57-3.67 (m, 2H), 3.63 (s, 6H), 5.11 (s, 2H), 6.11 (s, 1H), 7.00 (d,  $J = 7.2$  Hz, 2H), 7.19-7.36 (m, 8H), 7.55-7.63 (m, 2H), 7.87-7.98 (m, 3H), 8.10 (d,  $J = 8.7$  Hz, 1H), 8.53 (s, 1H);  $^{13}\text{C}$  NMR (75 MHz,  $\text{CDCl}_3$ )  $\delta$  27.6, 28.0, 35.6, 45.4, 47.5, 52.7, 52.8, 54.4, 105.9, 119.8, 123.9, 125.7, 126.3, 126.7, 127.0, 127.7, 128.3, 128.4, 128.5,

128.6, 128.8, 129.5, 129.7, 132.5, 133.1, 134.5, 134.9, 135.5, 138.5, 170.7, 172.1, 199.0; IR (film) 2951, 1730, 1680, 1448, 1246, 1202, 1174, 1030, 757, 730, 696  $\text{cm}^{-1}$ ; HRMS (ESI) exact mass calcd for  $\text{C}_{37}\text{H}_{34}\text{NO}_5(\text{M}+\text{H})^+$  requires  $m/z$  572.2431, found  $m/z$  572.2430. The enantiomeric excess was determined by Daicel Chiralpak AD-H (25 cm), Hexanes / IPA = 95 / 5, 0.8 mL/min,  $\lambda$  = 254 nm,  $t$  (major) = 87.55 min,  $t$  (minor) = 97.88 min.

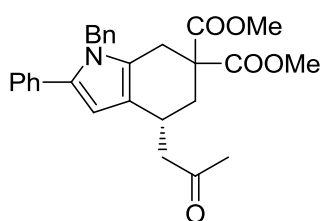

**(R)-Dimethyl 1-benzyl-4-(2-oxopropyl)-2-phenyl-4,5-dihydro-1H-indole-6,6(7H)-dicarboxylate (3n)**

Yellow liquid (81.1mg, 88% yield, 88% *ee*), following silica gel column chromatography (ethyl acetate/petroleum ether = 1/10, v/v). Analytical data for **3n**:  $[\alpha]_{\text{D}}^{20} = +29.9$  ( $c = 0.5$  Acetone, 88% *ee*).  $^1\text{H}$  NMR (300 MHz,  $\text{CDCl}_3$ )  $\delta$  1.71-1.79 (m, 1H), 2.22 (s, 3H), 2.53-2.66 (m, 2H), 2.79 (dd,  $J_1 = 1.5$  Hz,  $J_2 = 15.9$  Hz, 1H), 2.90 (dd,  $J_1 = 6.0$  Hz,  $J_2 = 17.1$  Hz, 1H), 3.23 (d,  $J = 15.3$  Hz, 1H), 3.33-3.41 (m, 1H), 3.66 (s, 3H), 3.68 (s, 3H), 5.04 (AB,  $J = 17.1$  Hz, 1H), 5.11 (AB,  $J = 17.1$  Hz, 1H), 6.00 (s, 1H), 6.97 (d,  $J = 7.2$  Hz, 2H), 7.18-7.34 (m, 8H);  $^{13}\text{C}$  NMR (75 MHz,  $\text{CDCl}_3$ )  $\delta$  27.1, 27.9, 30.4, 35.4, 47.4, 50.3, 52.6, 52.7, 54.3, 105.7, 119.5, 125.6, 126.1, 126.8, 127.0, 128.2, 128.4, 128.6, 133.0, 134.8, 138.4, 170.6, 171.9, 208.0; IR (film) 2953, 2924, 1732, 1603, 1434, 1357, 1249, 1088, 1030, 973, 760, 731, 699, 665  $\text{cm}^{-1}$ ; HRMS (ESI) exact mass calcd for  $\text{C}_{28}\text{H}_{30}\text{NO}_5(\text{M}+\text{H})^+$  requires  $m/z$  460.2118, found  $m/z$  460.2120. The enantiomeric excess was determined by Daicel Chiralpak AD-H (25 cm), Hexanes / IPA = 97 / 3, 1.0 mL/min,  $\lambda$  = 254 nm,  $t$  (major) = 31.74 min,  $t$  (minor) = 34.03 min.

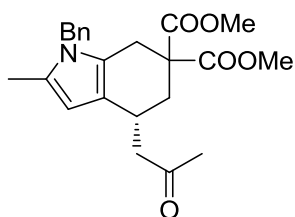

**(R)-Dimethyl 1-benzyl-2-methyl-4-(2-oxopropyl)-4,5-dihydro-1H-indole-6,6(7H)-dicarboxylate (3o)**

Yellow liquid (59.2 mg, 75% yield, 69% *ee*), following silica gel column chromatography (ethyl acetate/petroleum ether = 1/10, v/v). Analytical data for **3o**:  $[\alpha]_{\text{D}}^{20} = +8.8$  ( $c = 0.5$  Acetone, 69% *ee*).  $^1\text{H}$  NMR (300 MHz,  $\text{CDCl}_3$ )  $\delta$  1.71 (dd,  $J_1 = 11.1$  Hz,  $J_2 = 13.2$  Hz, 1H), 2.07 (s, 3H), 2.21 (s,

3H), 2.46-2.64 (m, 2H), 2.76-2.85 (m, 2H), 3.23-3.28 (m, 2H), 3.66 (s, 3H), 3.69 (s, 3H), 4.97 (s, 2H), 5.65 (s, 1H), 6.94 (d,  $J = 7.5$  Hz, 2H), 7.21-7.33 (m, 3H);  $^{13}\text{C}$  NMR (75 MHz,  $\text{CDCl}_3$ )  $\delta$  11.9, 27.2, 27.8, 30.3, 35.5, 46.5, 50.5, 52.6, 52.7, 54.4, 103.6, 117.9, 123.6, 125.7, 127.0, 128.4, 128.5, 138.0, 170.6, 172.1, 208.2; IR (film) 2952, 2925, 1732, 1496, 1432, 1401, 1357, 1249, 1086, 1050, 731, 698, 665  $\text{cm}^{-1}$ ; HRMS (ESI) exact mass calcd for  $\text{C}_{23}\text{H}_{28}\text{NO}_5(\text{M}+\text{H})^+$  requires  $m/z$  398.1962, found  $m/z$  398.1969. The enantiomeric excess was determined by Daicel Chiralpak AD-H (25 cm), Hexanes / IPA = 90 / 10, 1.0 mL/min,  $\lambda = 254$  nm,  $t$  (major) = 15.51 min,  $t$  (minor) = 12.65 min.

### **X-Ray structure of enantiopure 3k**

(*R*)-dimethyl 1-benzyl-4-(2-(4-bromophenyl)-2-oxoethyl)-2-phenyl-4,5-dihydro-1H-indole-6,6(7H)-dicarboxylate [CCDC 1045810 contains the supplementary crystallographic data. These data can be obtained free of charge from the Cambridge Crystallographic Data Centre via [www.ccdc.cam.ac.uk /data request/cif.](http://www.ccdc.cam.ac.uk/data_request/cif)]

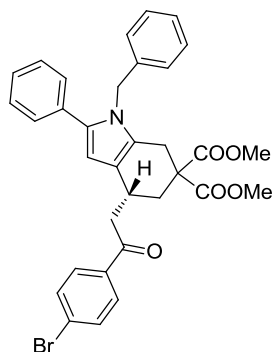

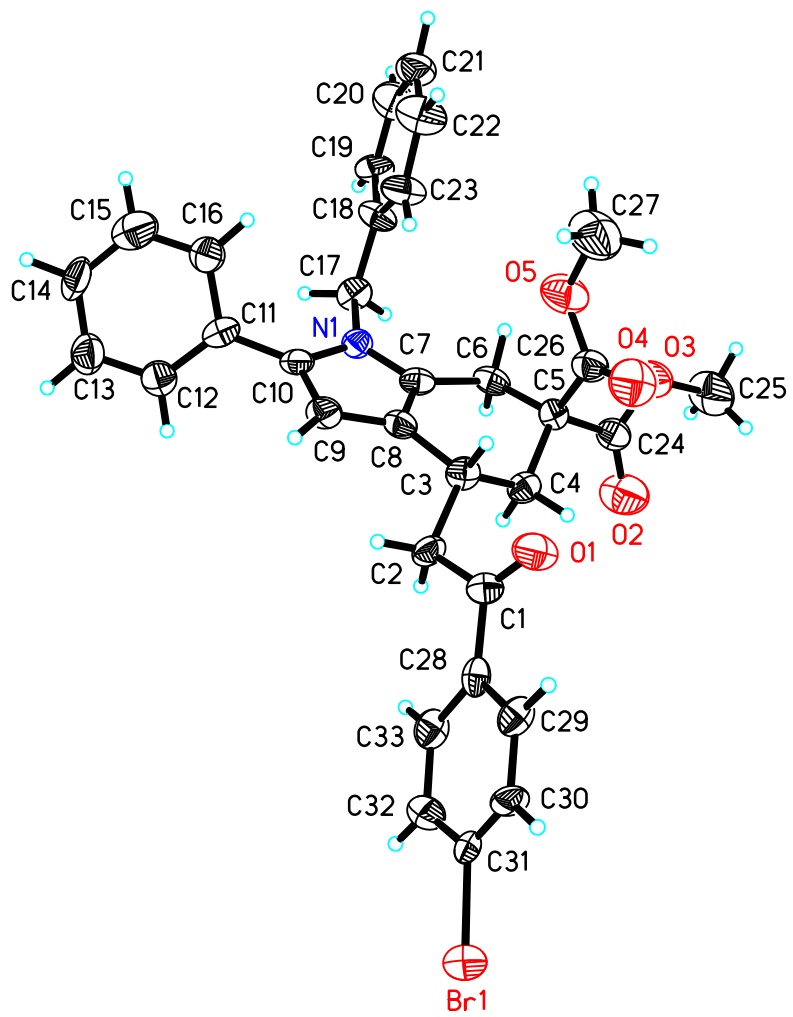

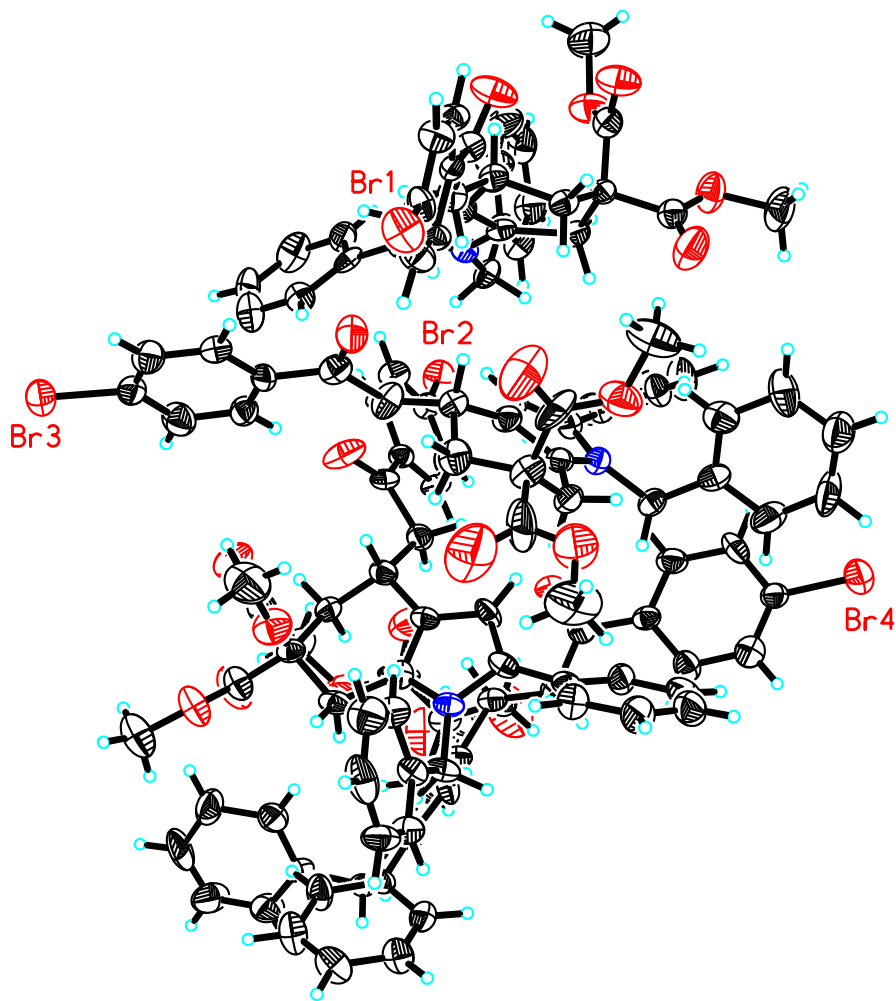

Table 1. Crystal data and structure refinement for cd214165.

|                                   |                                                                          |
|-----------------------------------|--------------------------------------------------------------------------|
| Identification code               | cd214165                                                                 |
| Empirical formula                 | C33 H30 Br N O5                                                          |
| Formula weight                    | 600.49                                                                   |
| Temperature                       | 293(2) K                                                                 |
| Wavelength                        | 0.71073 Å                                                                |
| Crystal system                    | Orthorhombic                                                             |
| Space group                       | I 2 2 2                                                                  |
| Unit cell dimensions              | a = 15.713(12) Å = 90°<br>b = 28.08(2) Å = 90°<br>c = 28.507(18) Å = 90° |
| Volume                            | 12578(15) Å <sup>3</sup>                                                 |
| Z                                 | 16                                                                       |
| Density (calculated)              | 1.268 Mg/m <sup>3</sup>                                                  |
| Absorption coefficient            | 1.346 mm <sup>-1</sup>                                                   |
| F(000)                            | 4960                                                                     |
| Crystal size                      | 0.156 x 0.142 x 0.103 mm <sup>3</sup>                                    |
| Theta range for data collection   | 1.018 to 25.499 °                                                        |
| Index ranges                      | 0 ≤ h ≤ 19, -34 ≤ k ≤ 26, -34 ≤ l ≤ 34                                   |
| Reflections collected             | 18429                                                                    |
| Independent reflections           | 11716 [R(int) = 0.0600]                                                  |
| Completeness to theta = 25.242 °  | 99.9 %                                                                   |
| Absorption correction             | Semi-empirical from equivalents                                          |
| Max. and min. transmission        | 0.7457 and 0.5761                                                        |
| Refinement method                 | Full-matrix least-squares on F <sup>2</sup>                              |
| Data / restraints / parameters    | 11716 / 0 / 725                                                          |
| Goodness-of-fit on F <sup>2</sup> | 0.891                                                                    |
| Final R indices [I > 2σ(I)]       | R1 = 0.0686, wR2 = 0.1544                                                |
| R indices (all data)              | R1 = 0.1326, wR2 = 0.1759                                                |
| Absolute structure parameter      | 0.031(9)                                                                 |
| Extinction coefficient            | n/a                                                                      |
| Largest diff. peak and hole       | 0.715 and -0.377 e. Å <sup>-3</sup>                                      |

# $^1\text{H}$ NMR and $^{13}\text{C}$ NMR Spectra of **1a**

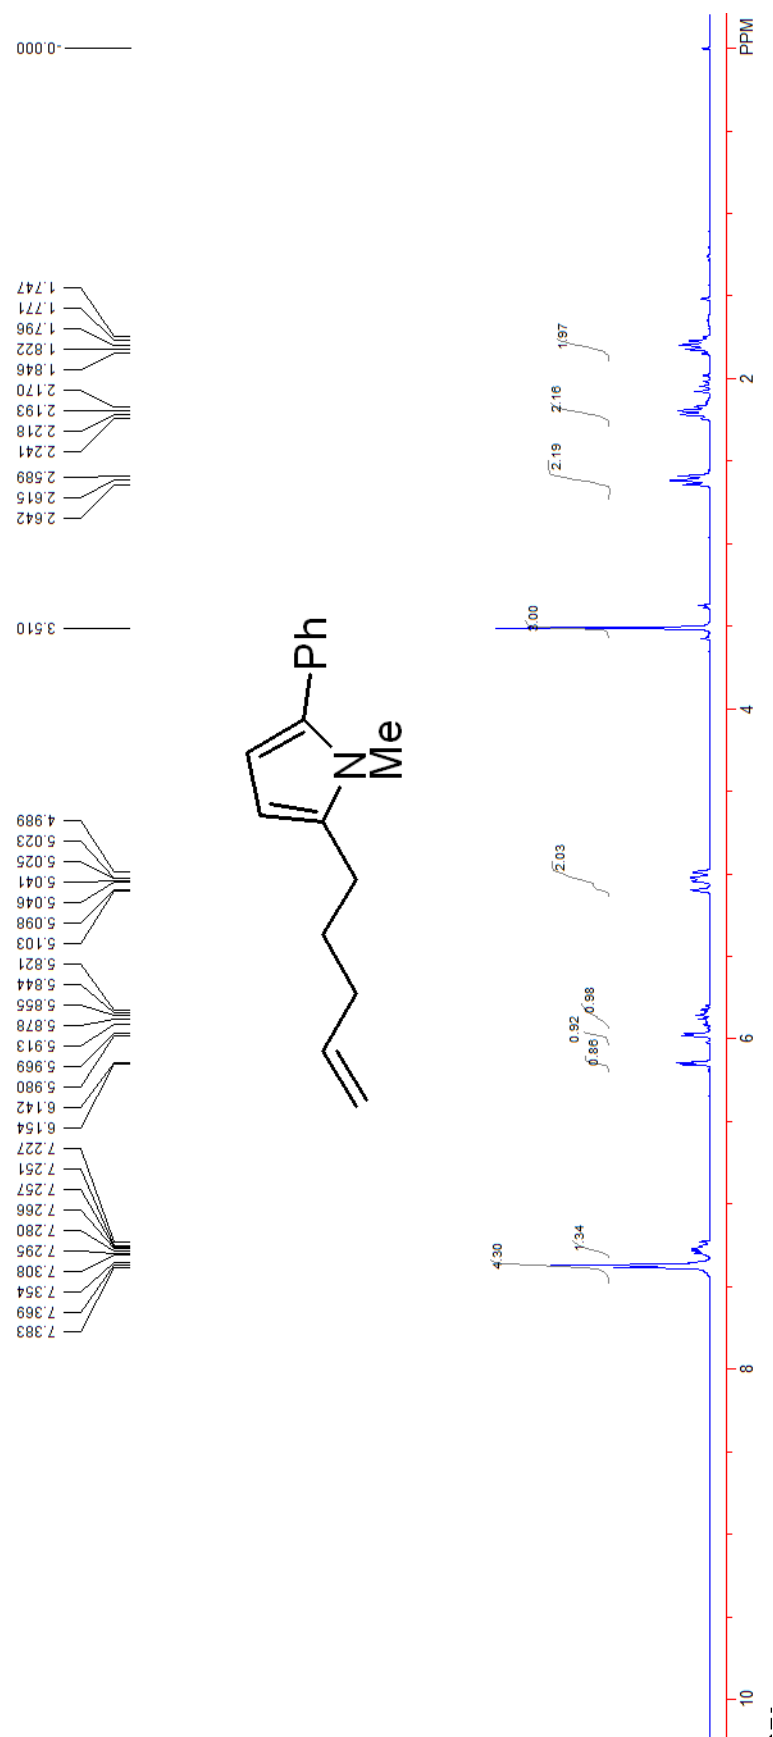

33.493  
31.640  
27.748  
26.427

77.424  
77.000  
76.568

114.904  
107.376  
105.345

138.404  
134.889  
134.115  
133.866  
128.745  
128.624  
128.269  
126.417

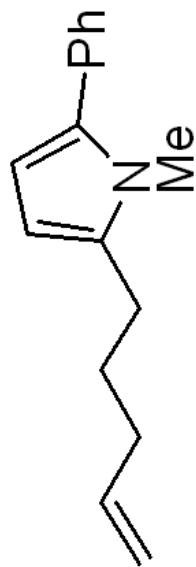

S24

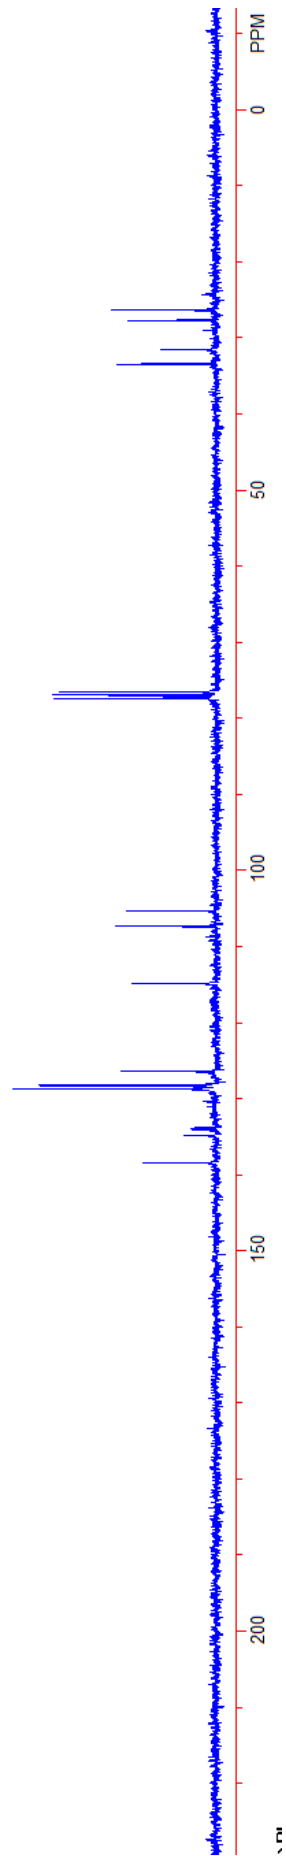



# $^1\text{H}$ NMR and $^{13}\text{C}$ NMR Spectra of **1b**

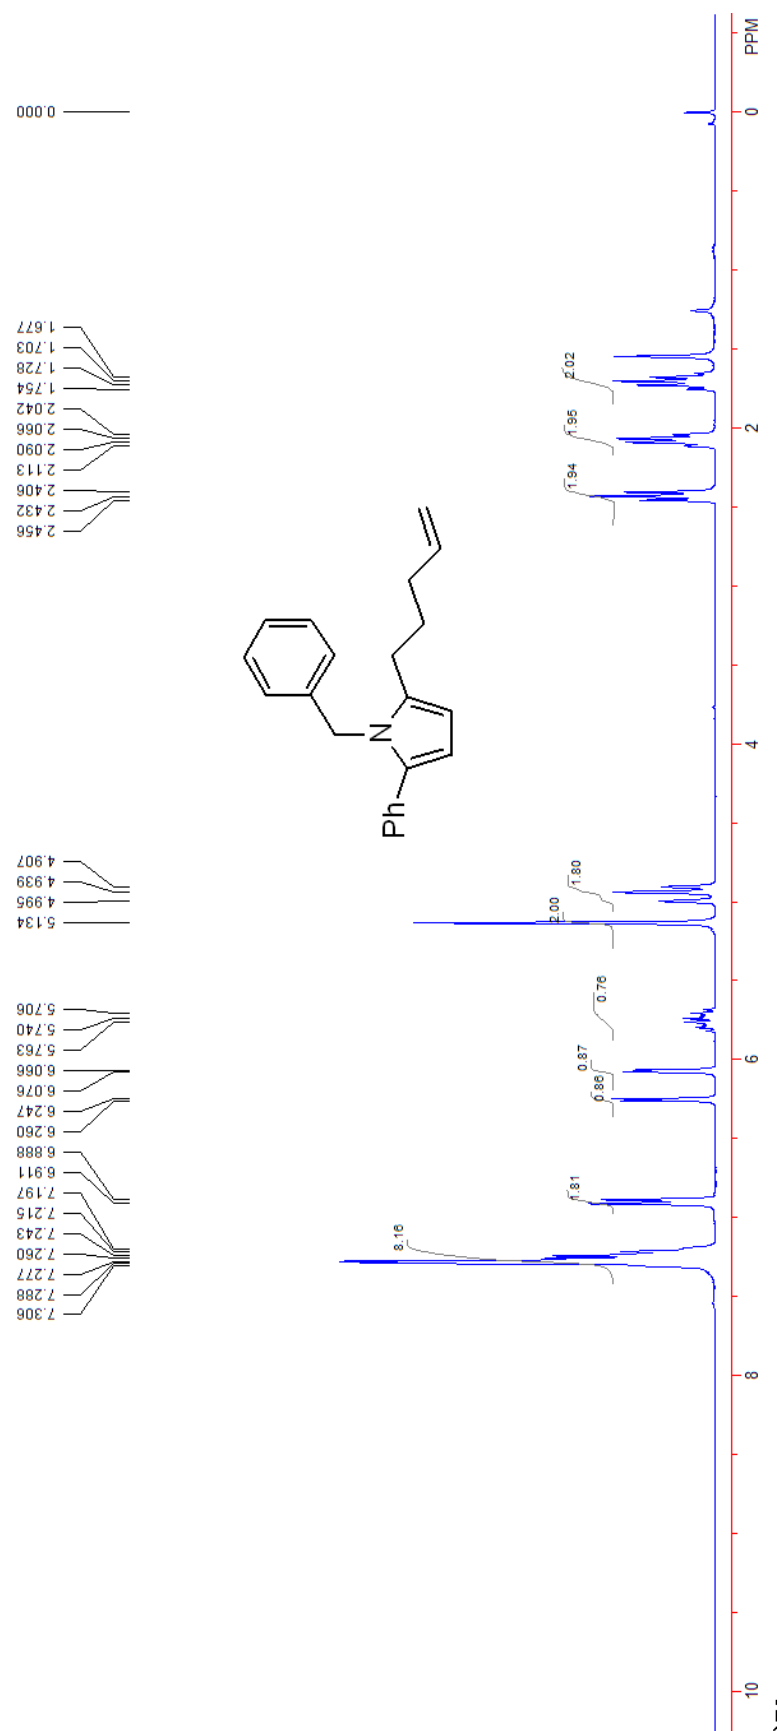

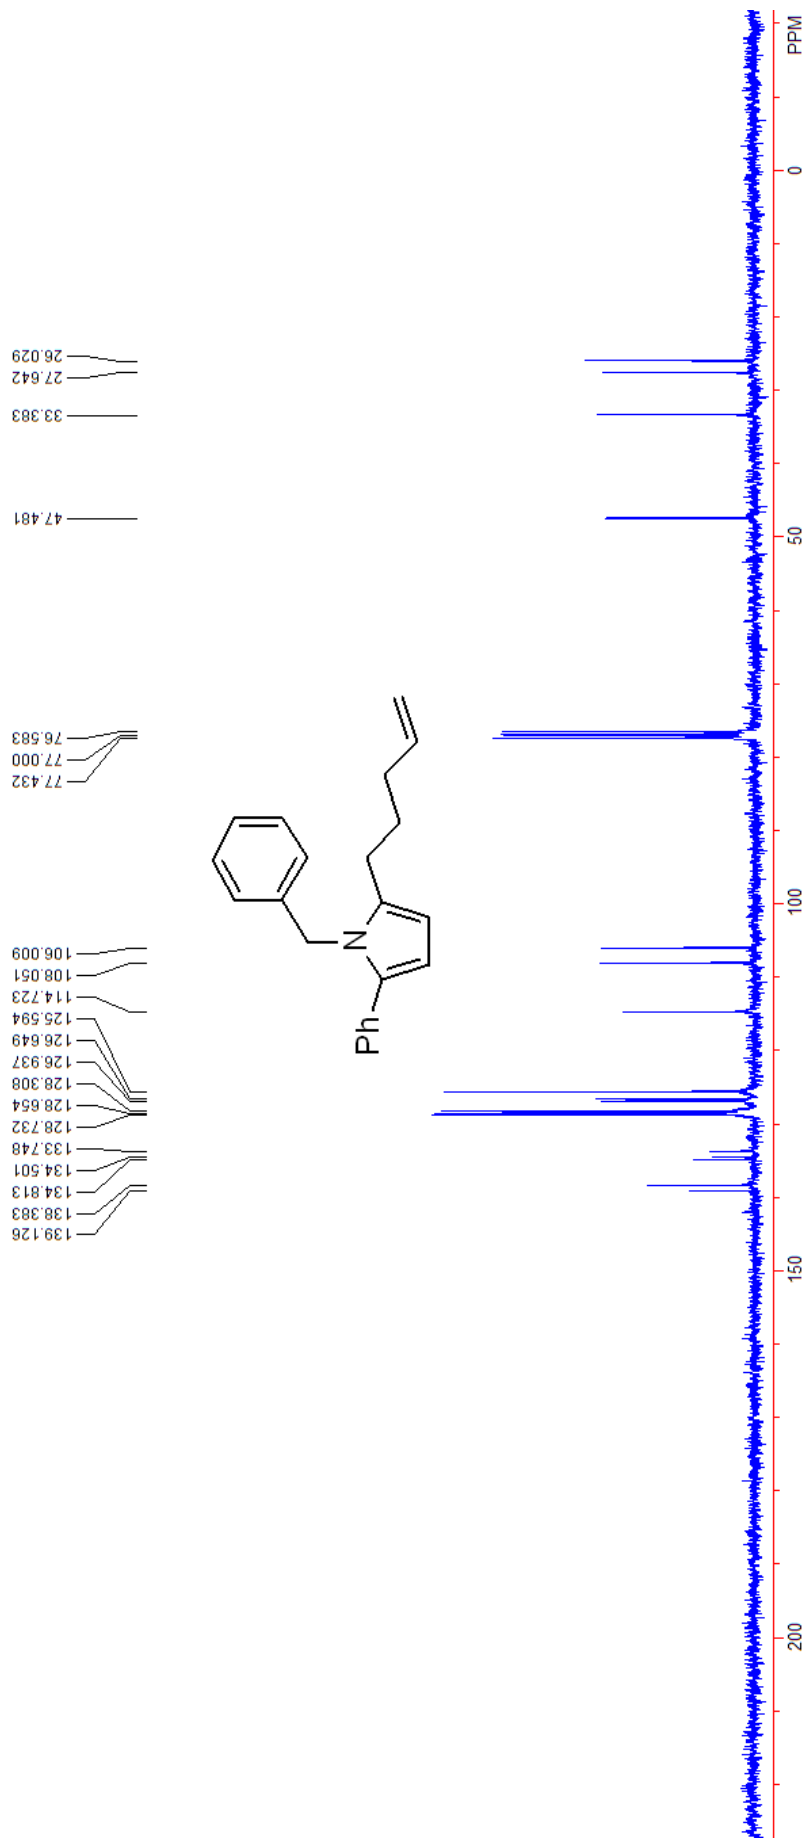

# $^1\text{H}$ NMR and $^{13}\text{C}$ NMR Spectra of **1c**

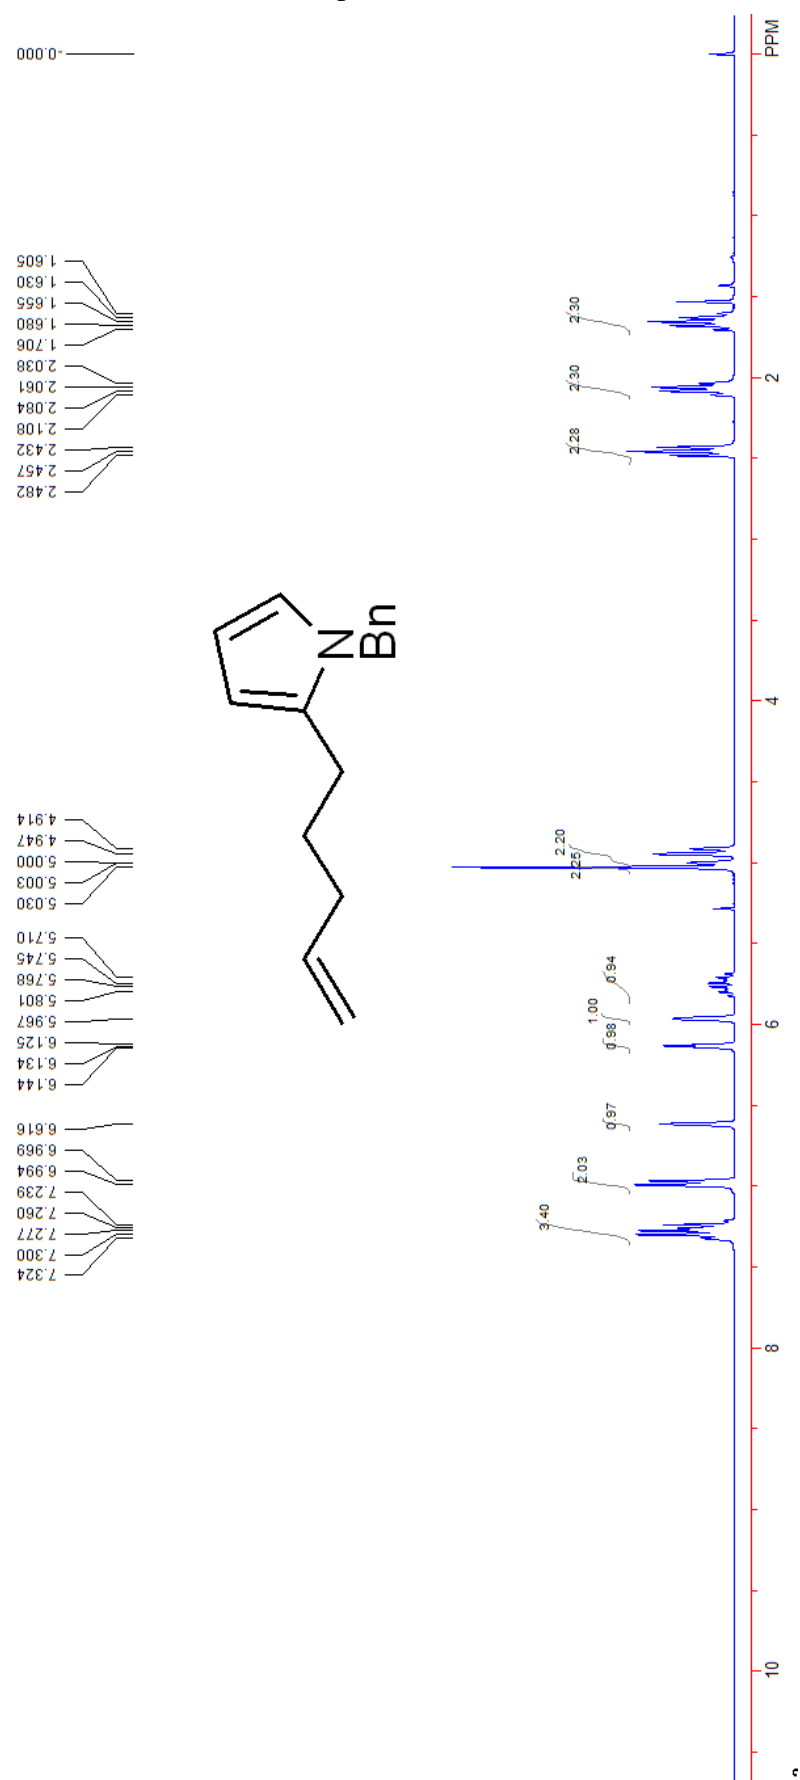

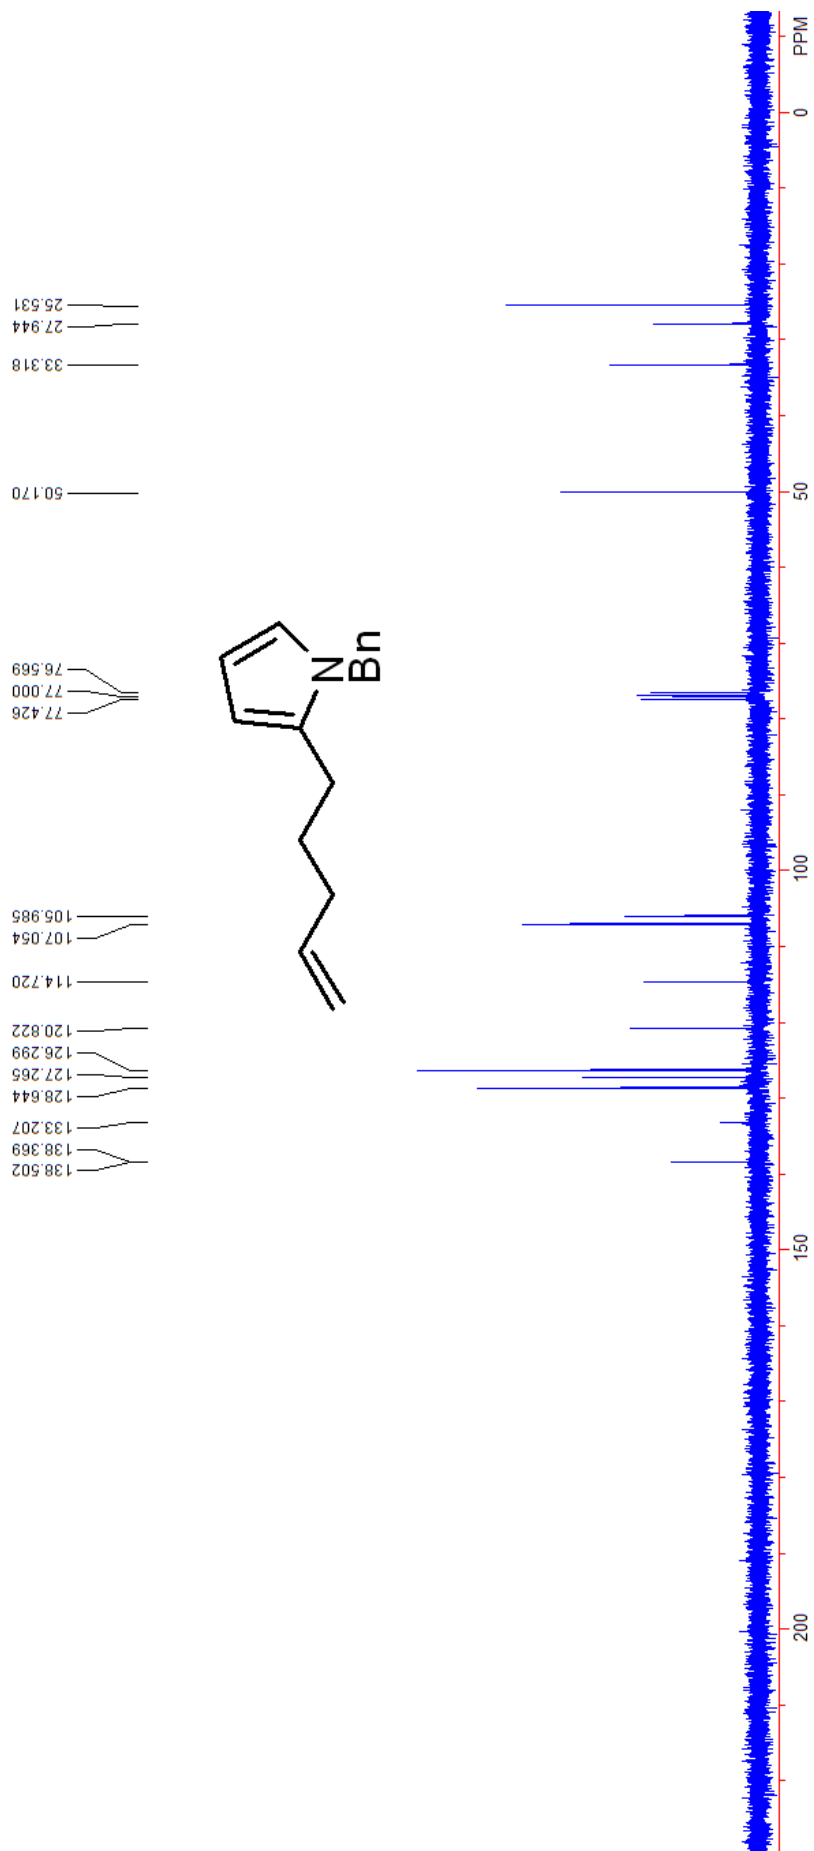

# $^1\text{H}$ NMR and $^{13}\text{C}$ NMR Spectra of **1d**

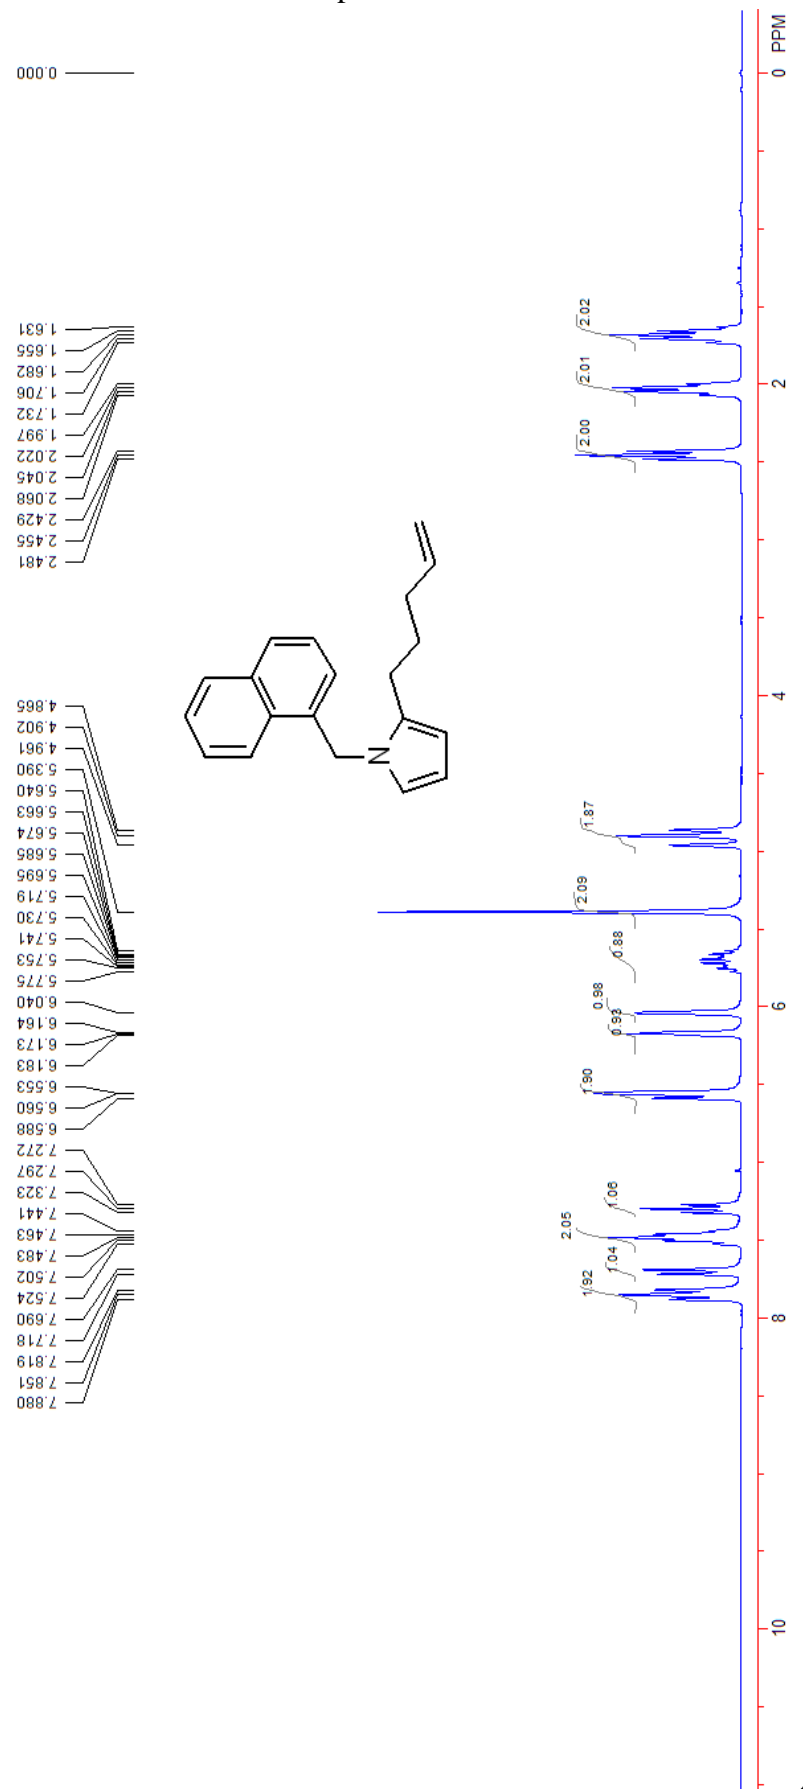

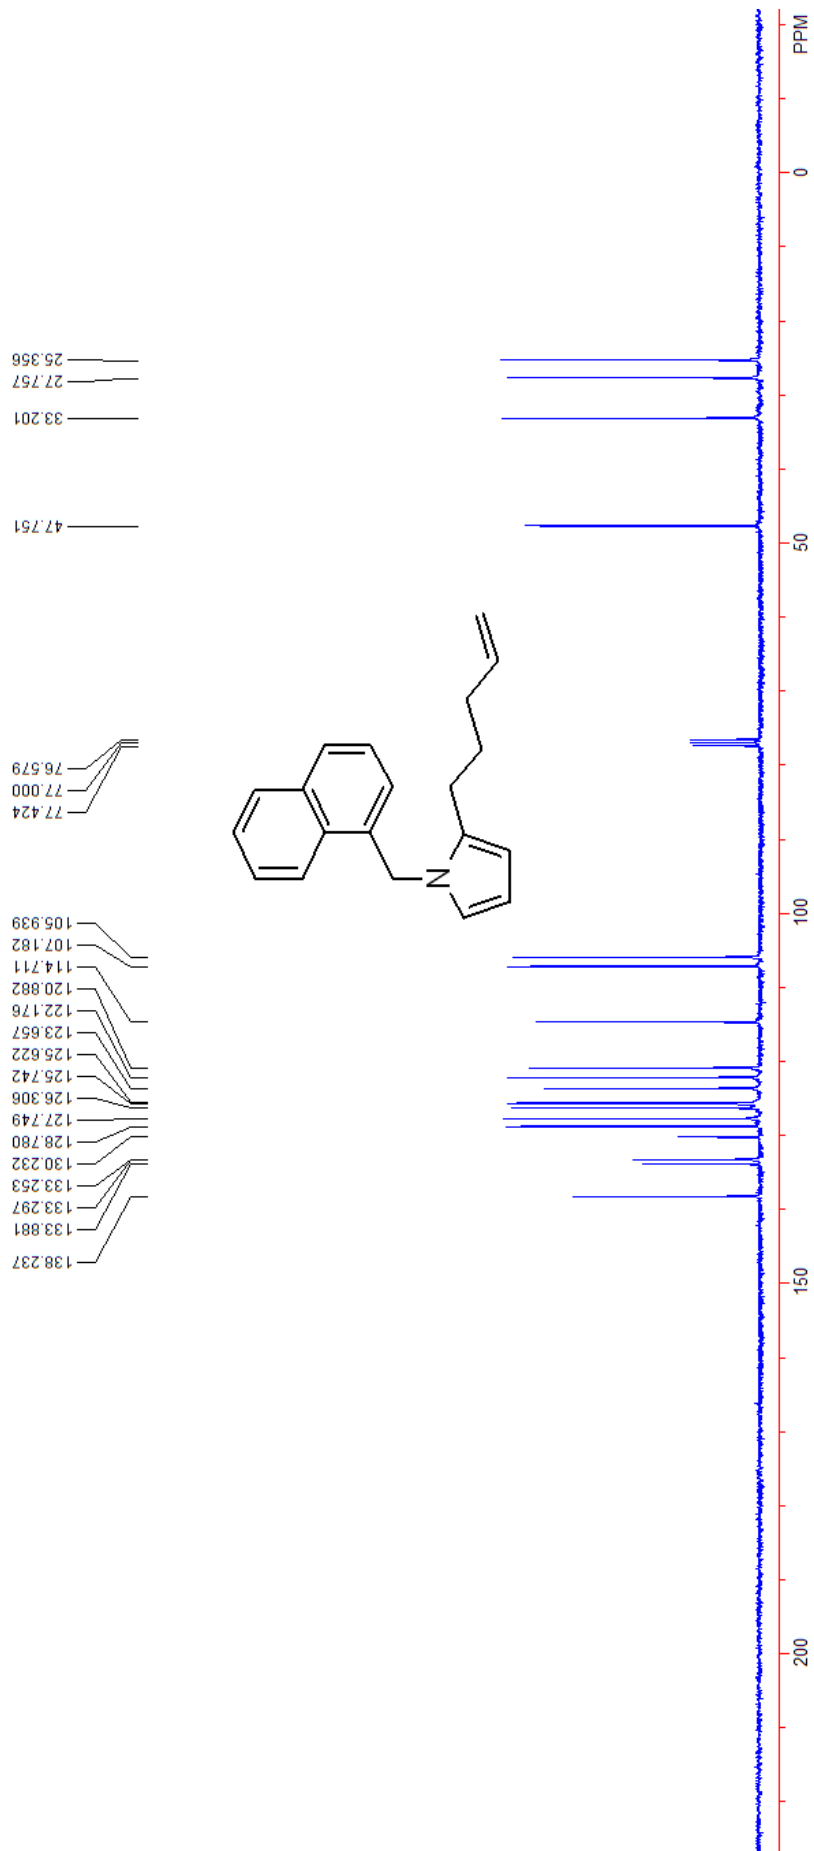

# $^1\text{H}$ NMR and $^{13}\text{C}$ NMR Spectra of **1e**

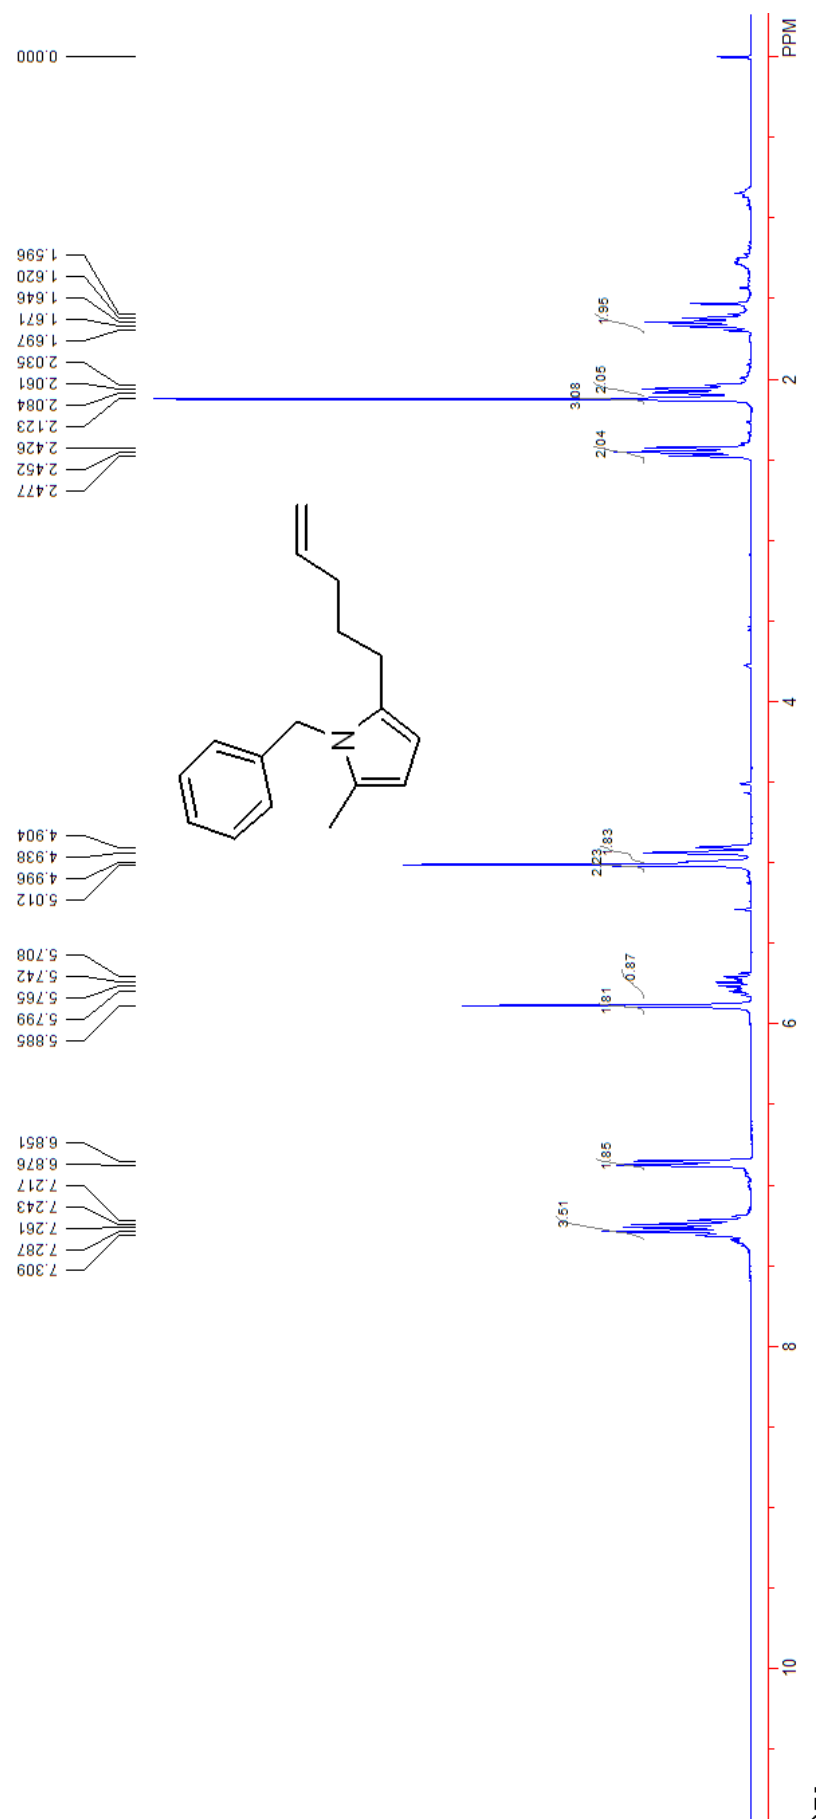

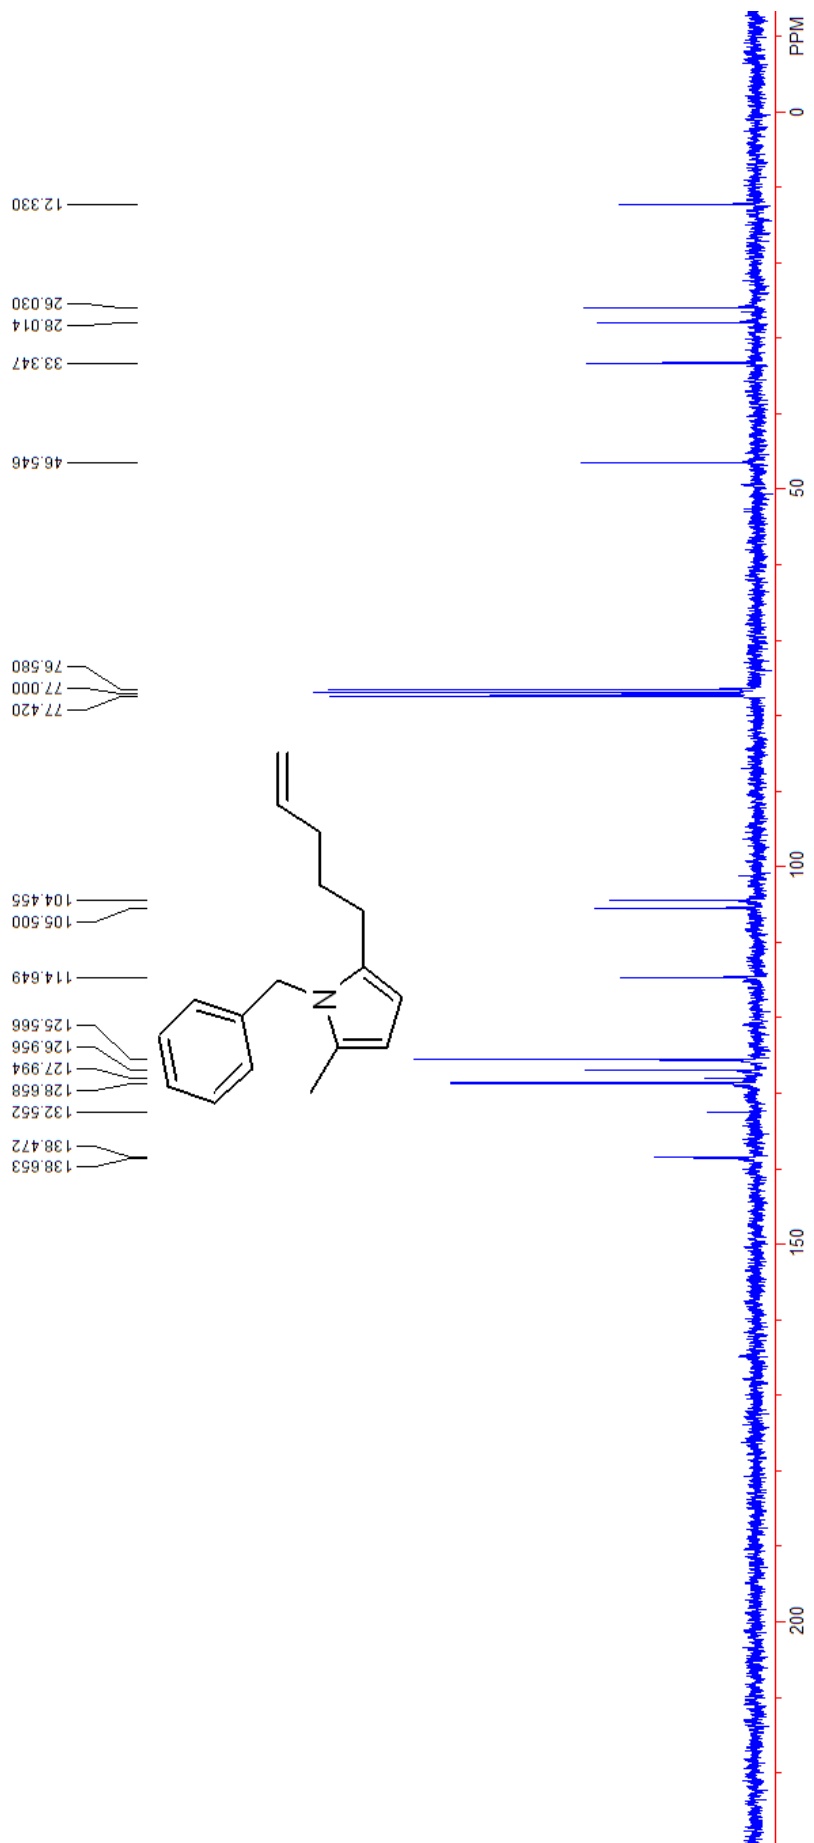



# <sup>1</sup>H NMR and <sup>13</sup>C NMR Spectra of **1f**

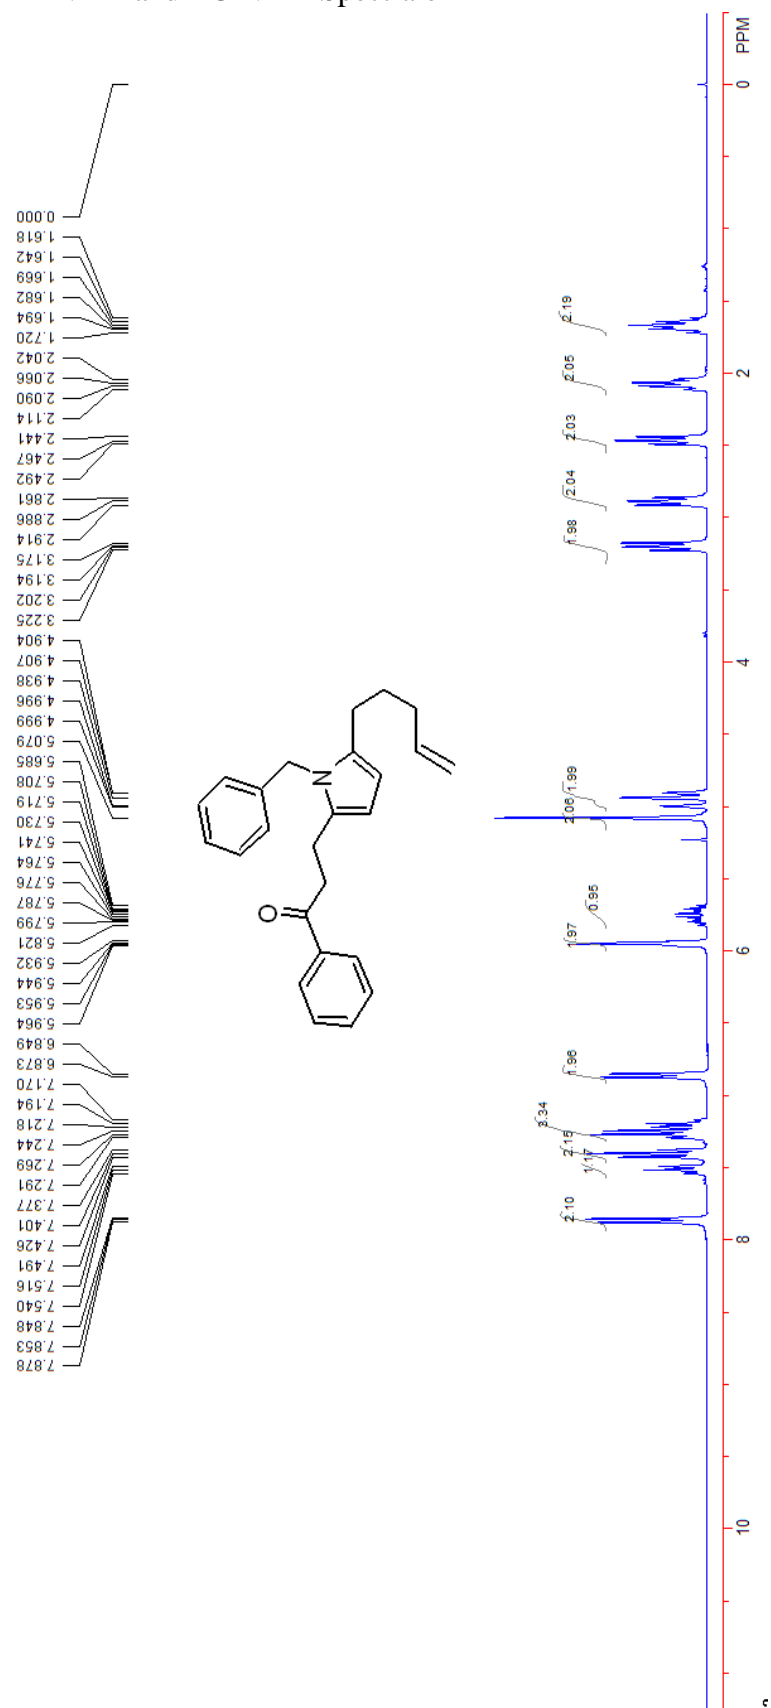

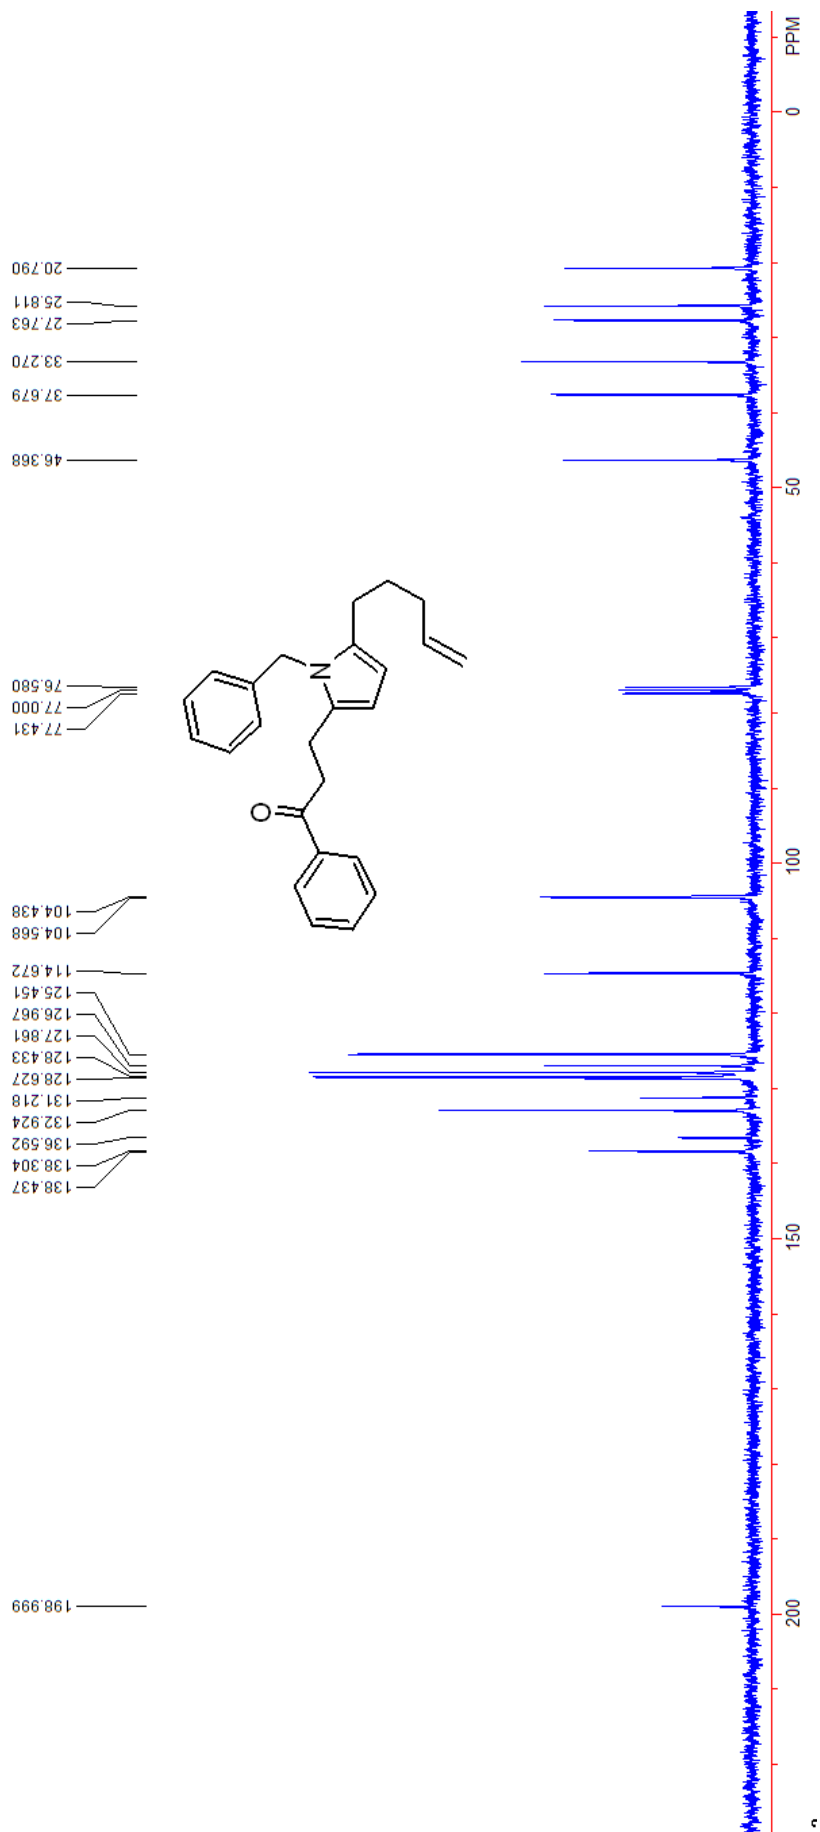

# $^1\text{H}$ NMR and $^{13}\text{C}$ NMR Spectra of **1g**

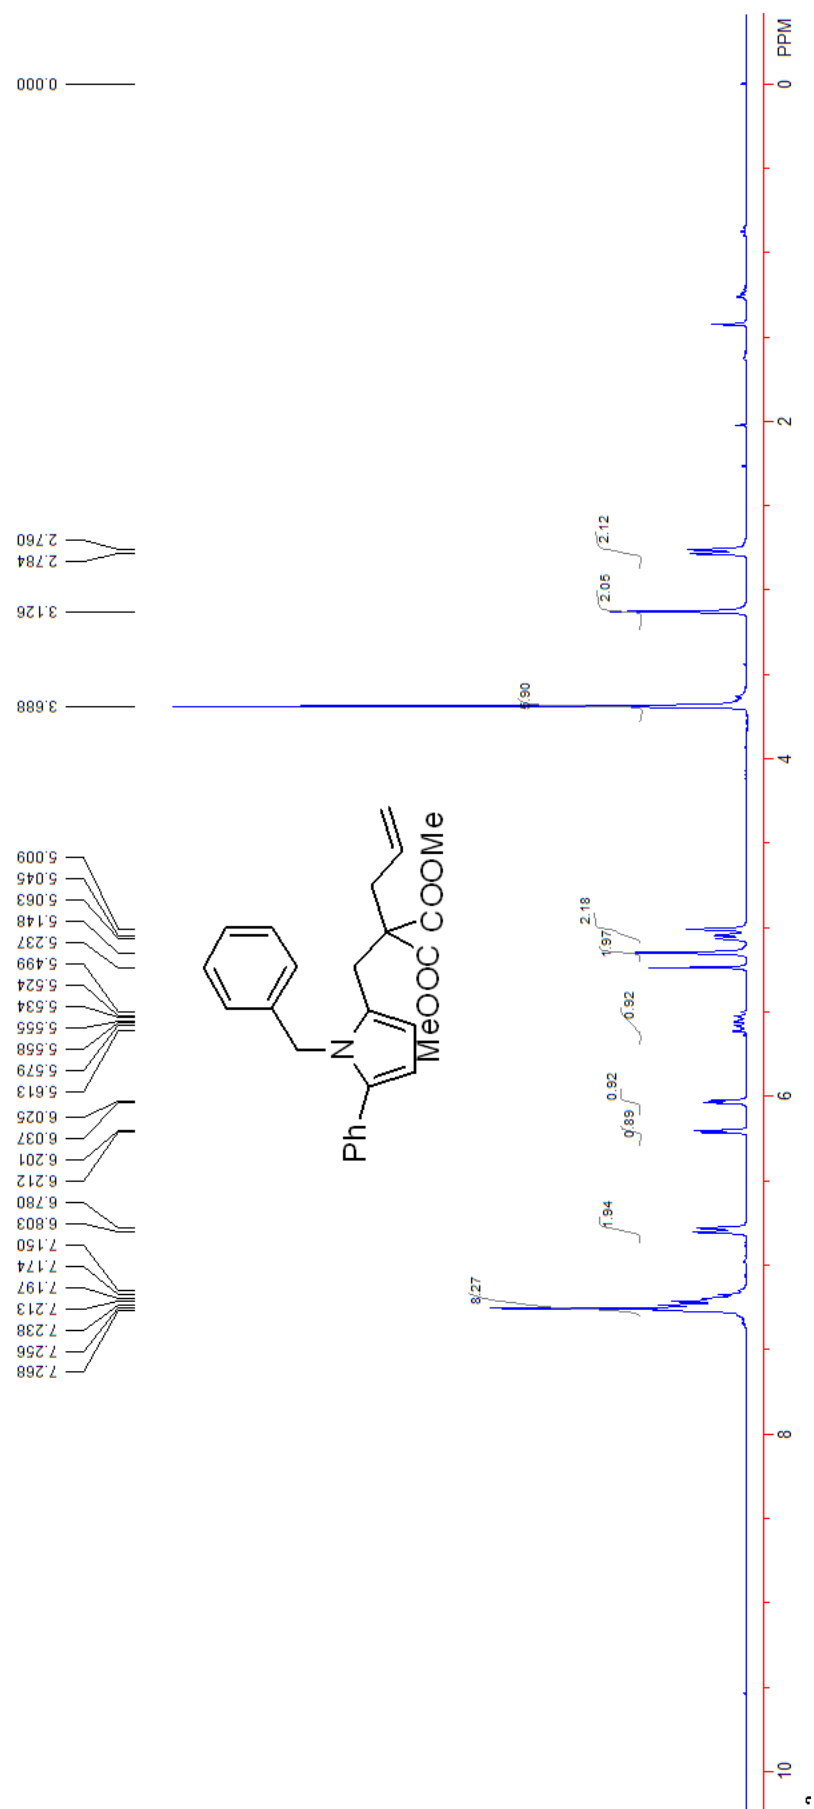

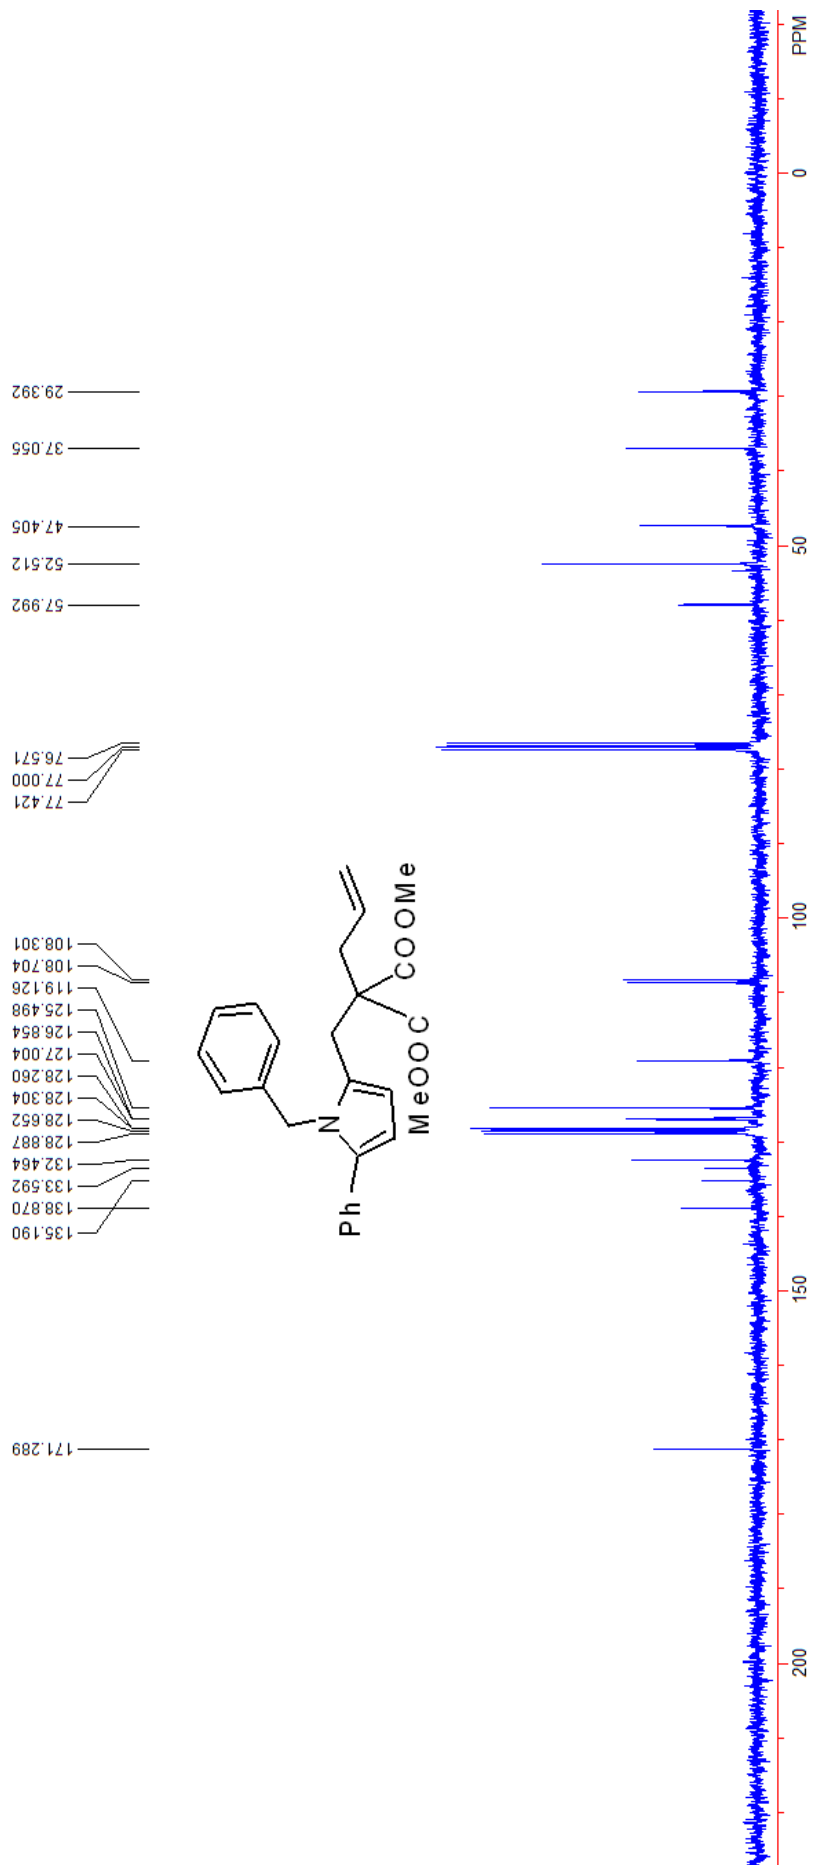

$^1\text{H}$  NMR and  $^{13}\text{C}$  NMR Spectra of **1h**

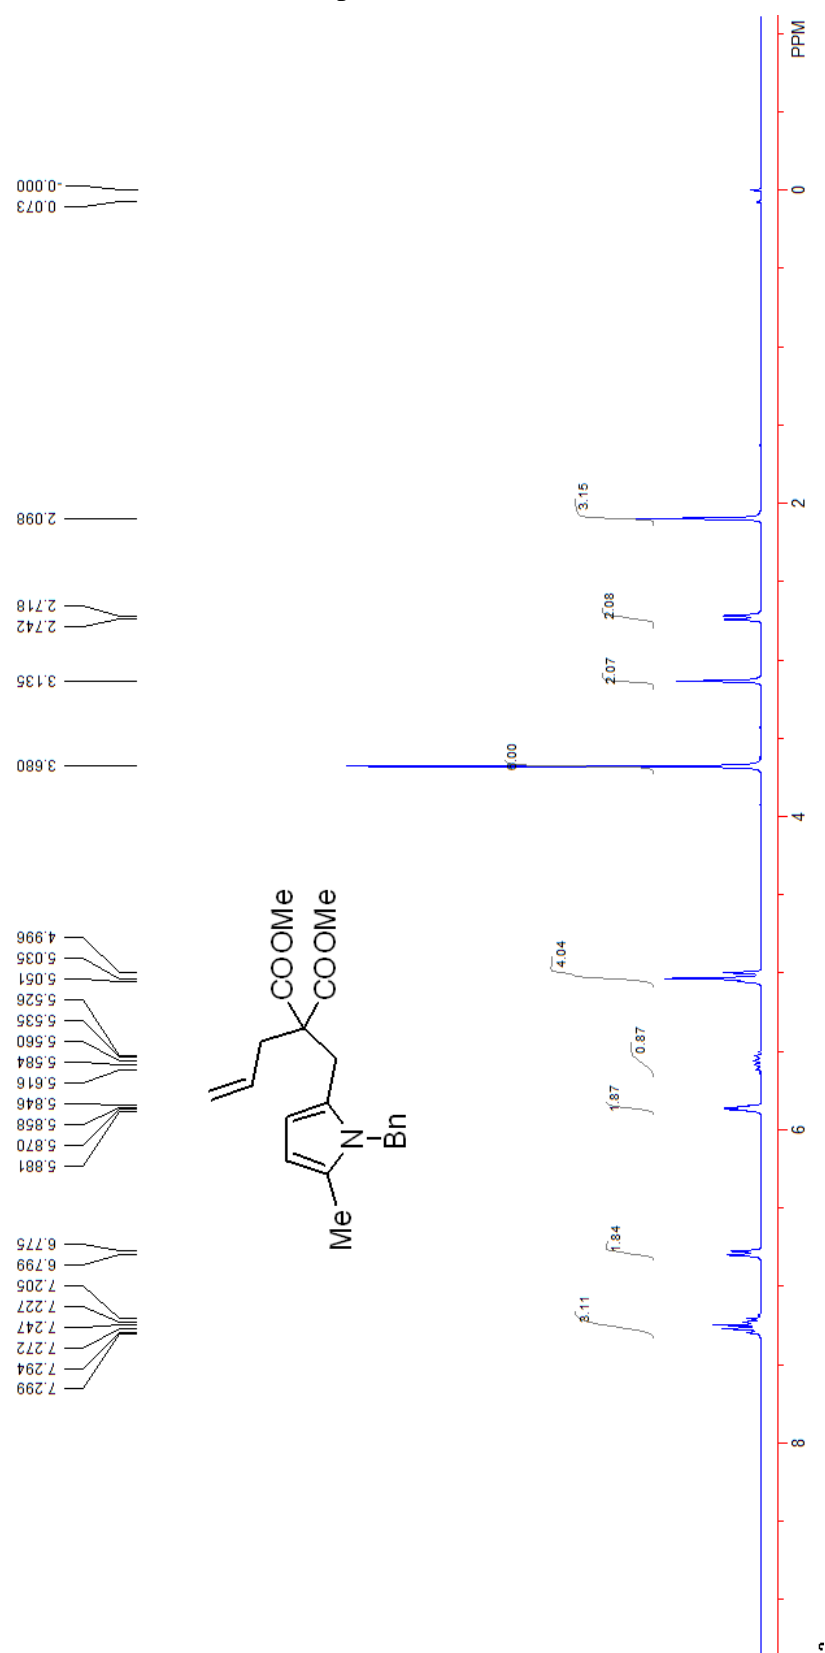

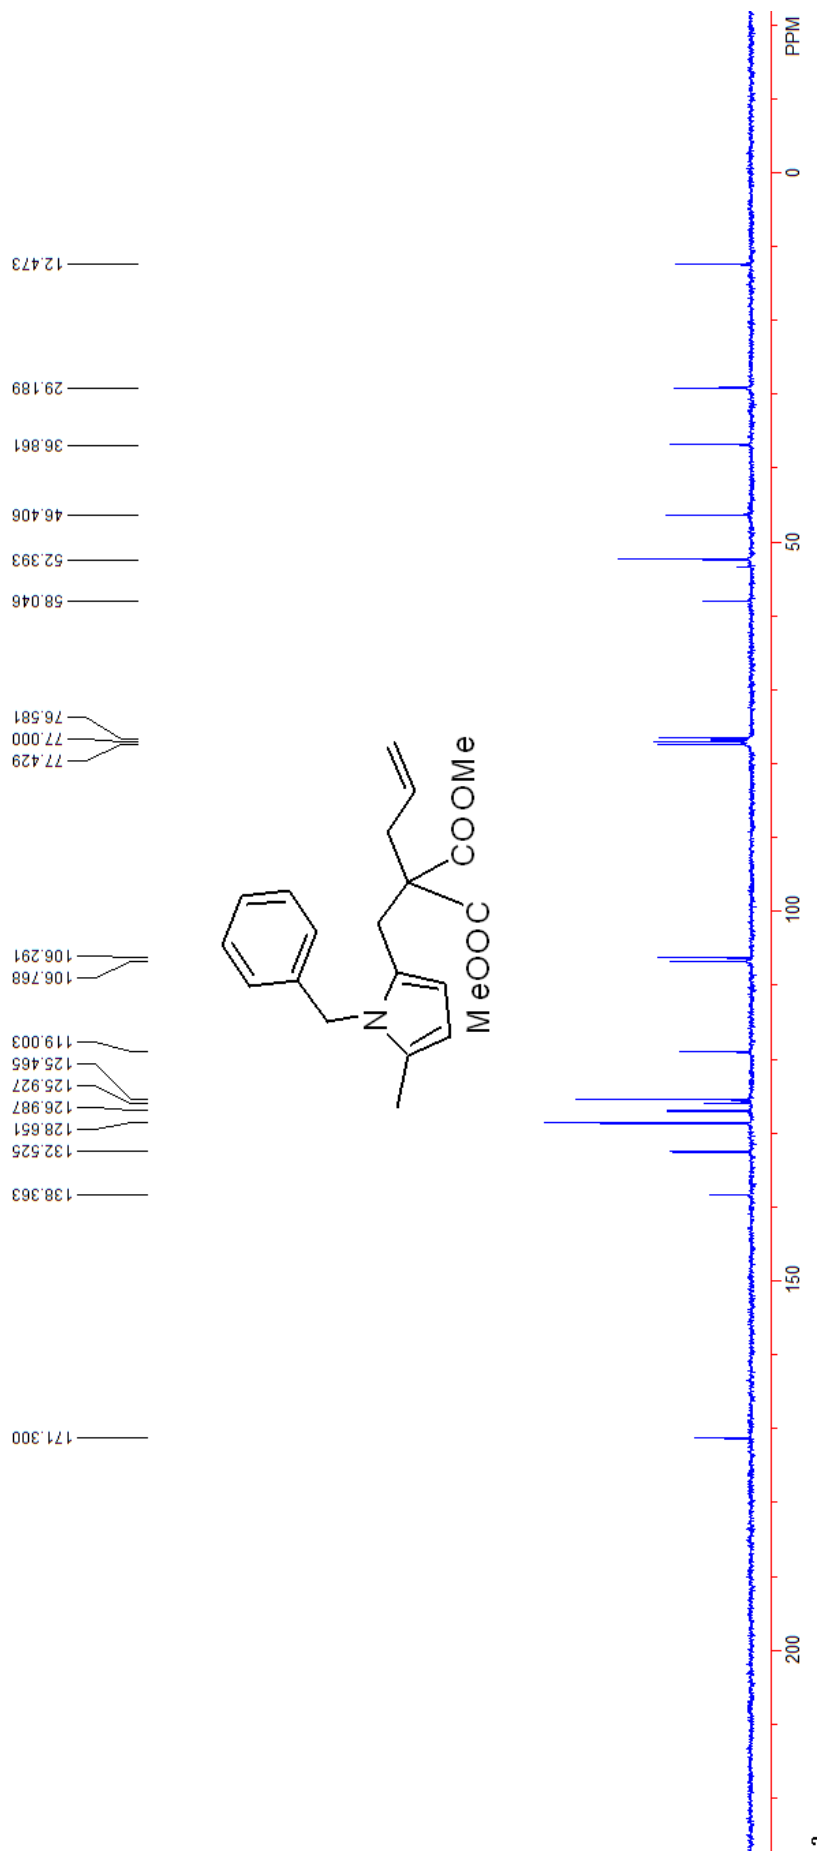

# $^1\text{H}$ NMR and $^{13}\text{C}$ NMR Spectra of **1i**

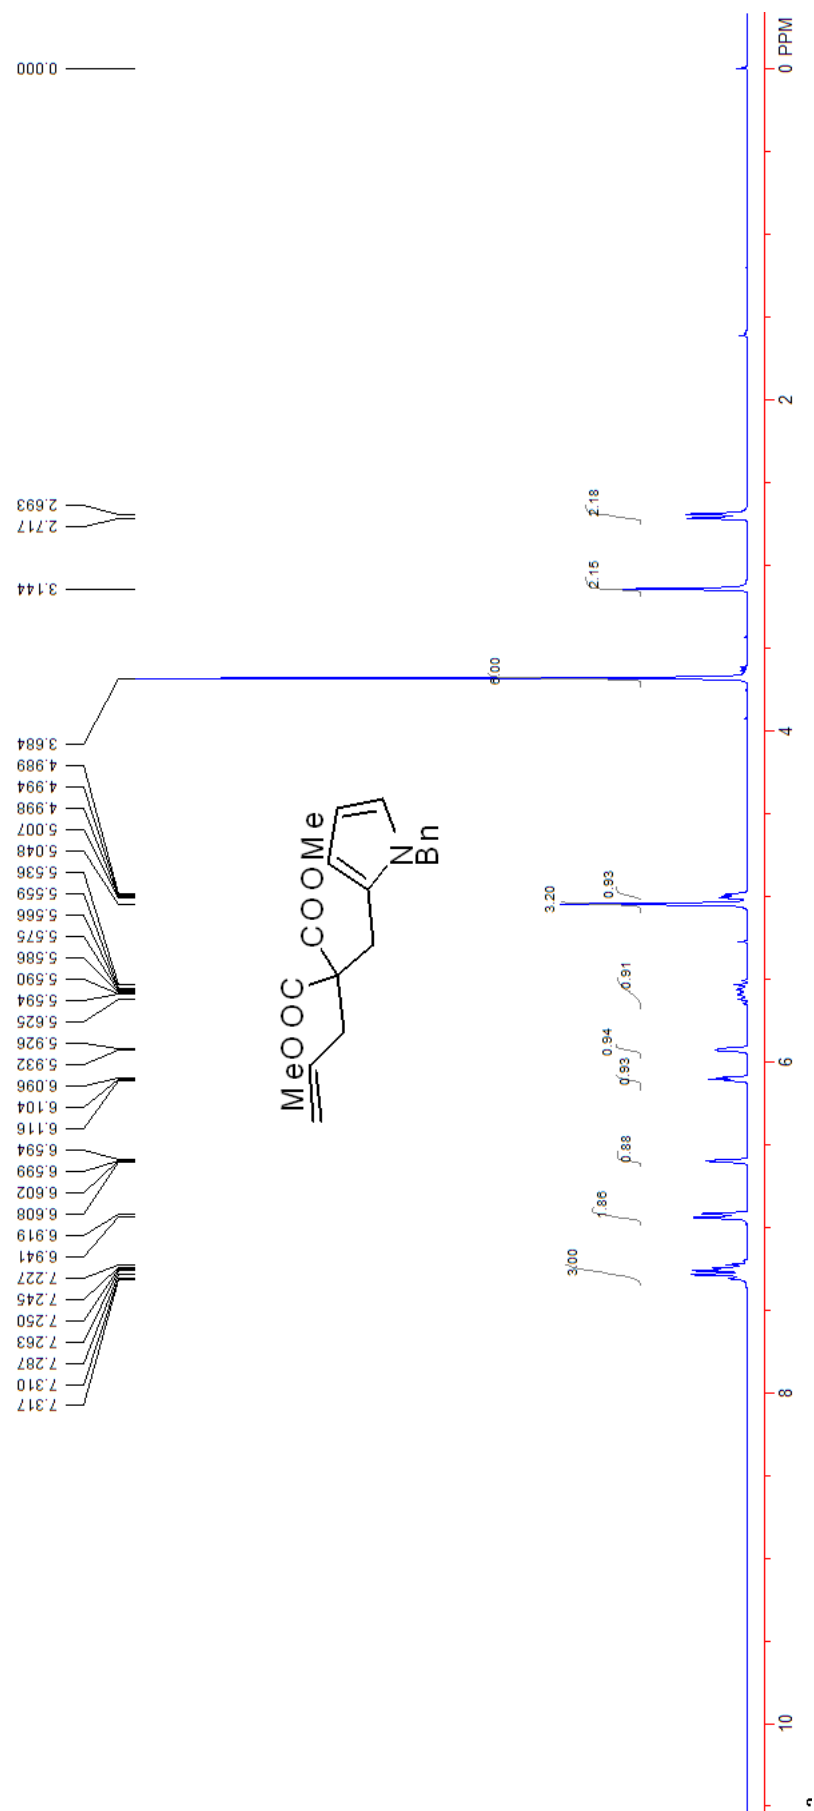

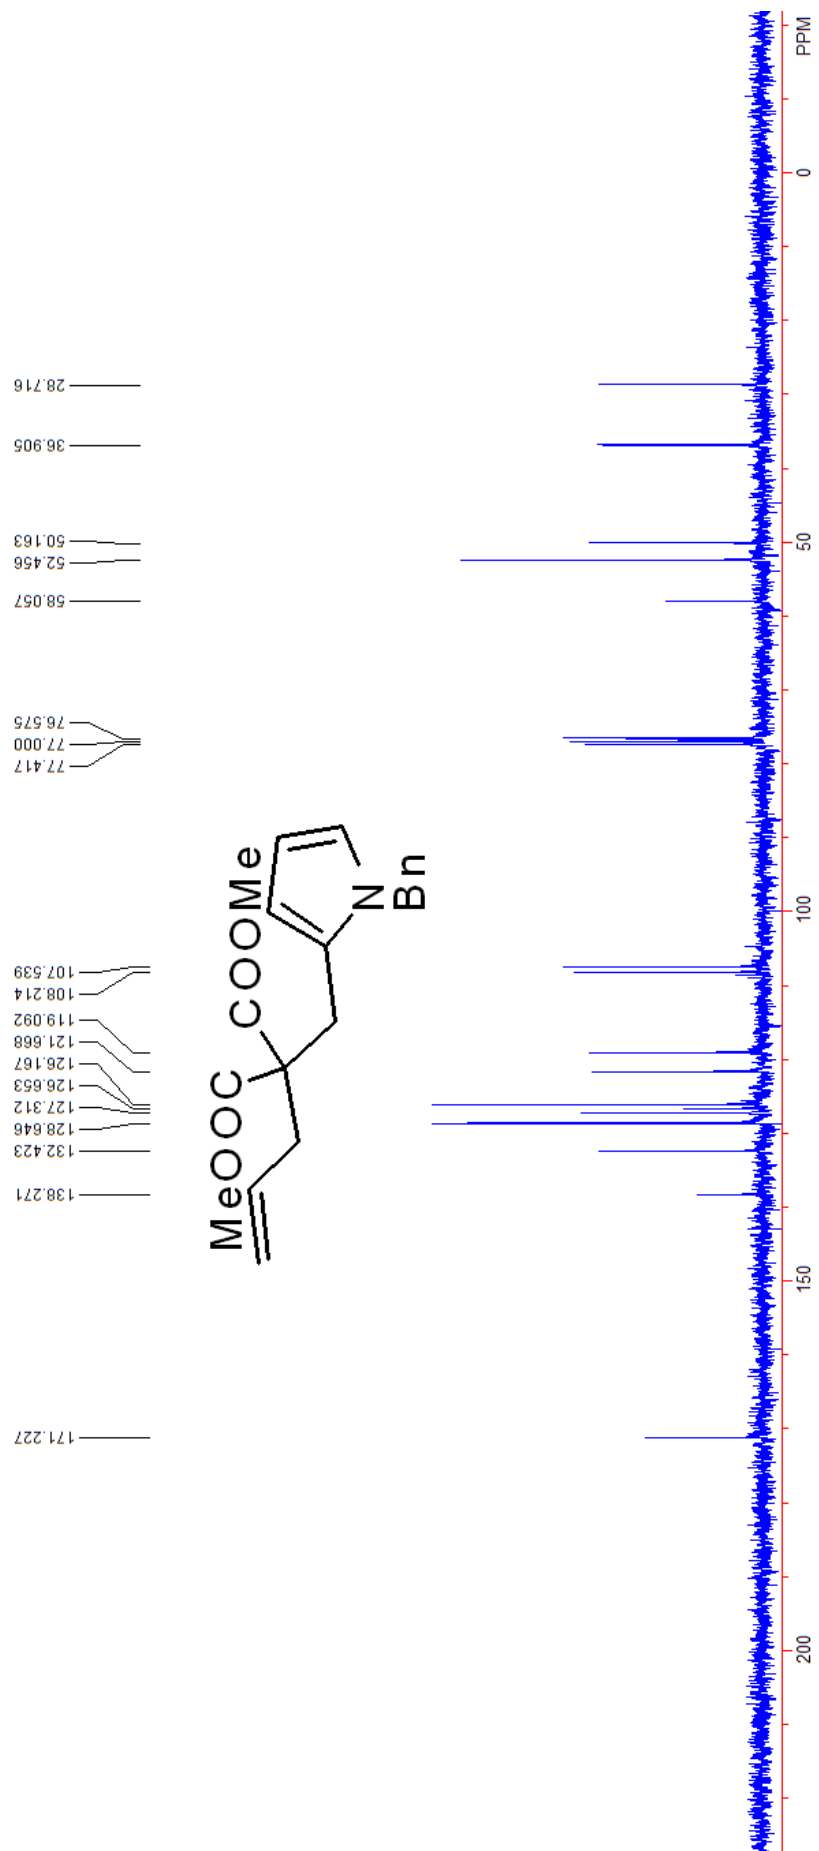



# $^1\text{H}$ NMR and $^{13}\text{C}$ NMR Spectra of **3a**

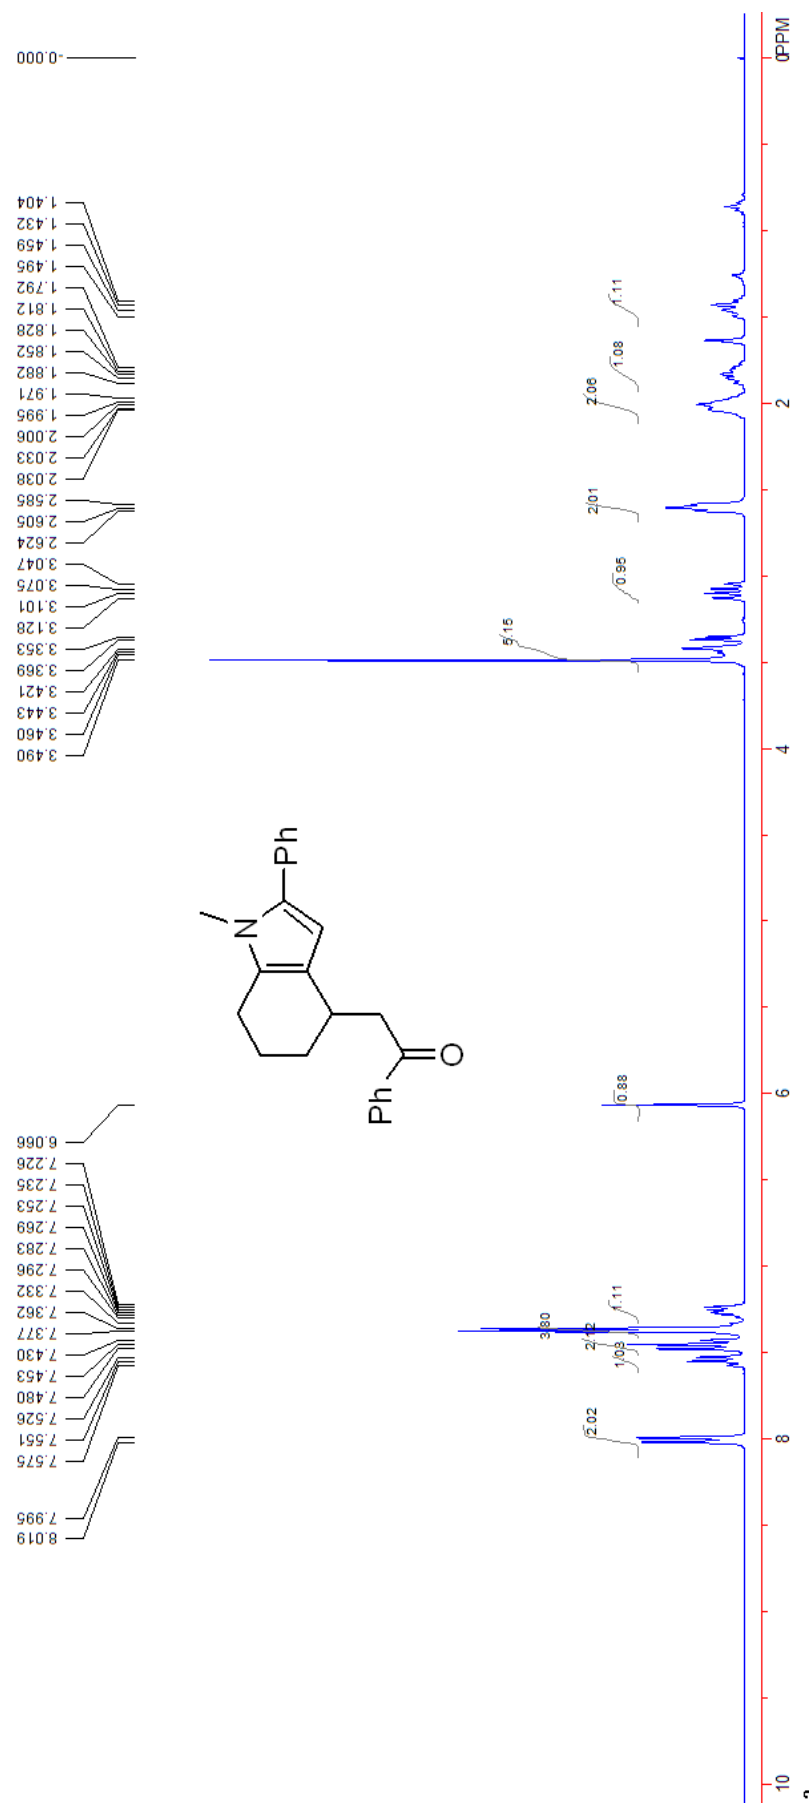

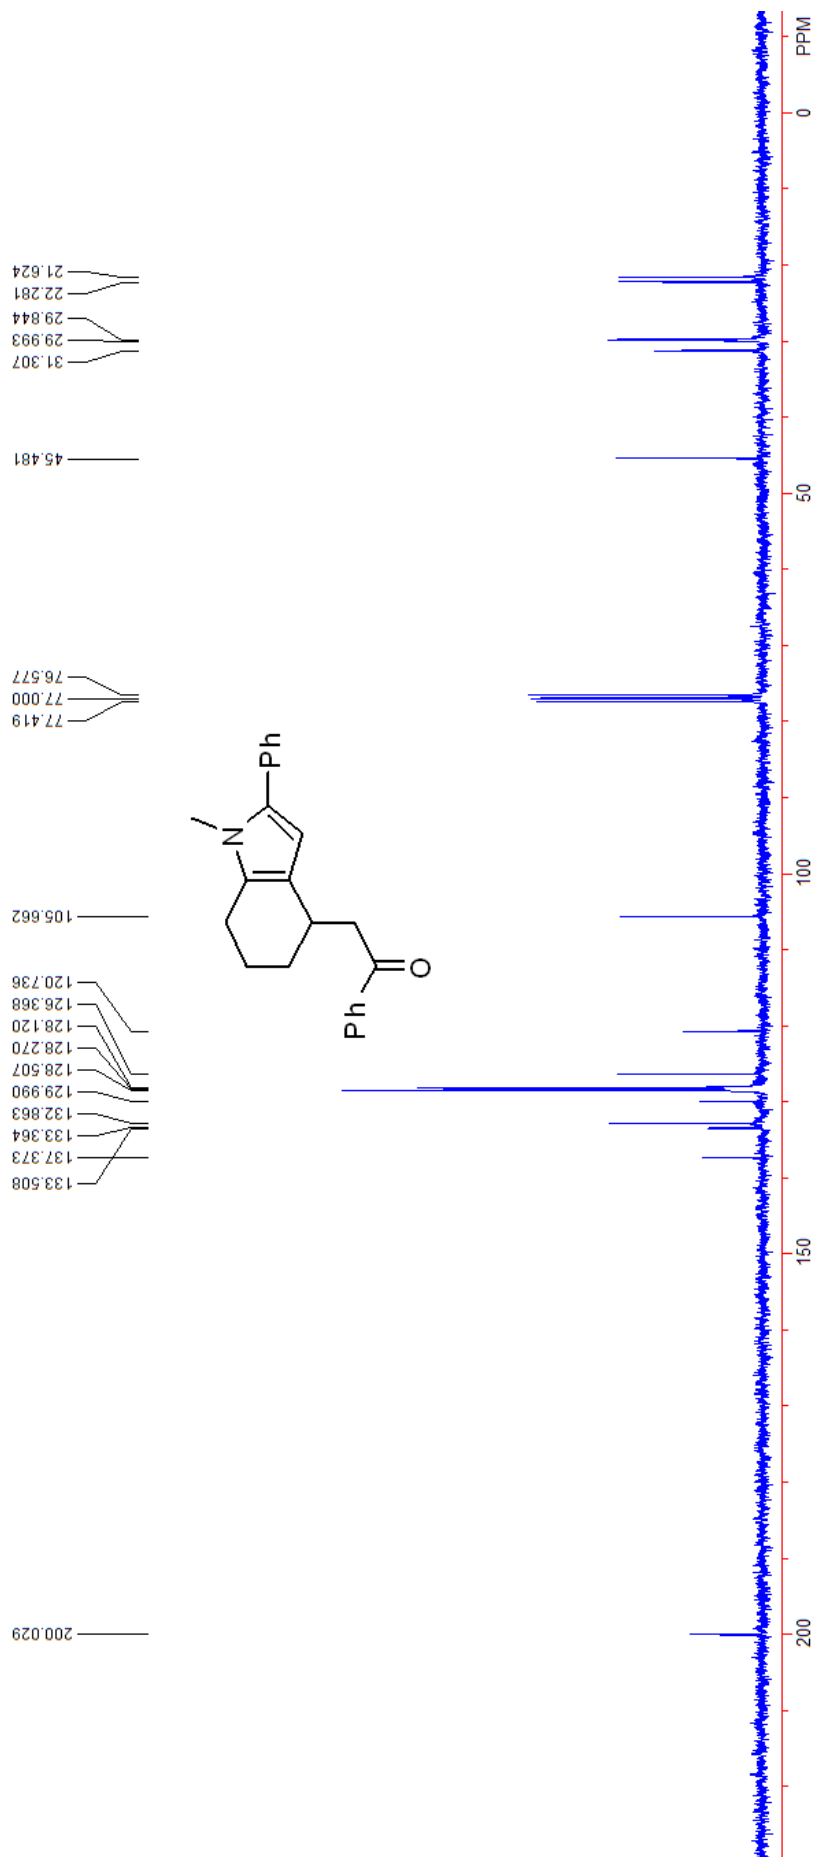

# $^1\text{H}$ NMR and $^{13}\text{C}$ NMR Spectra of **3b**

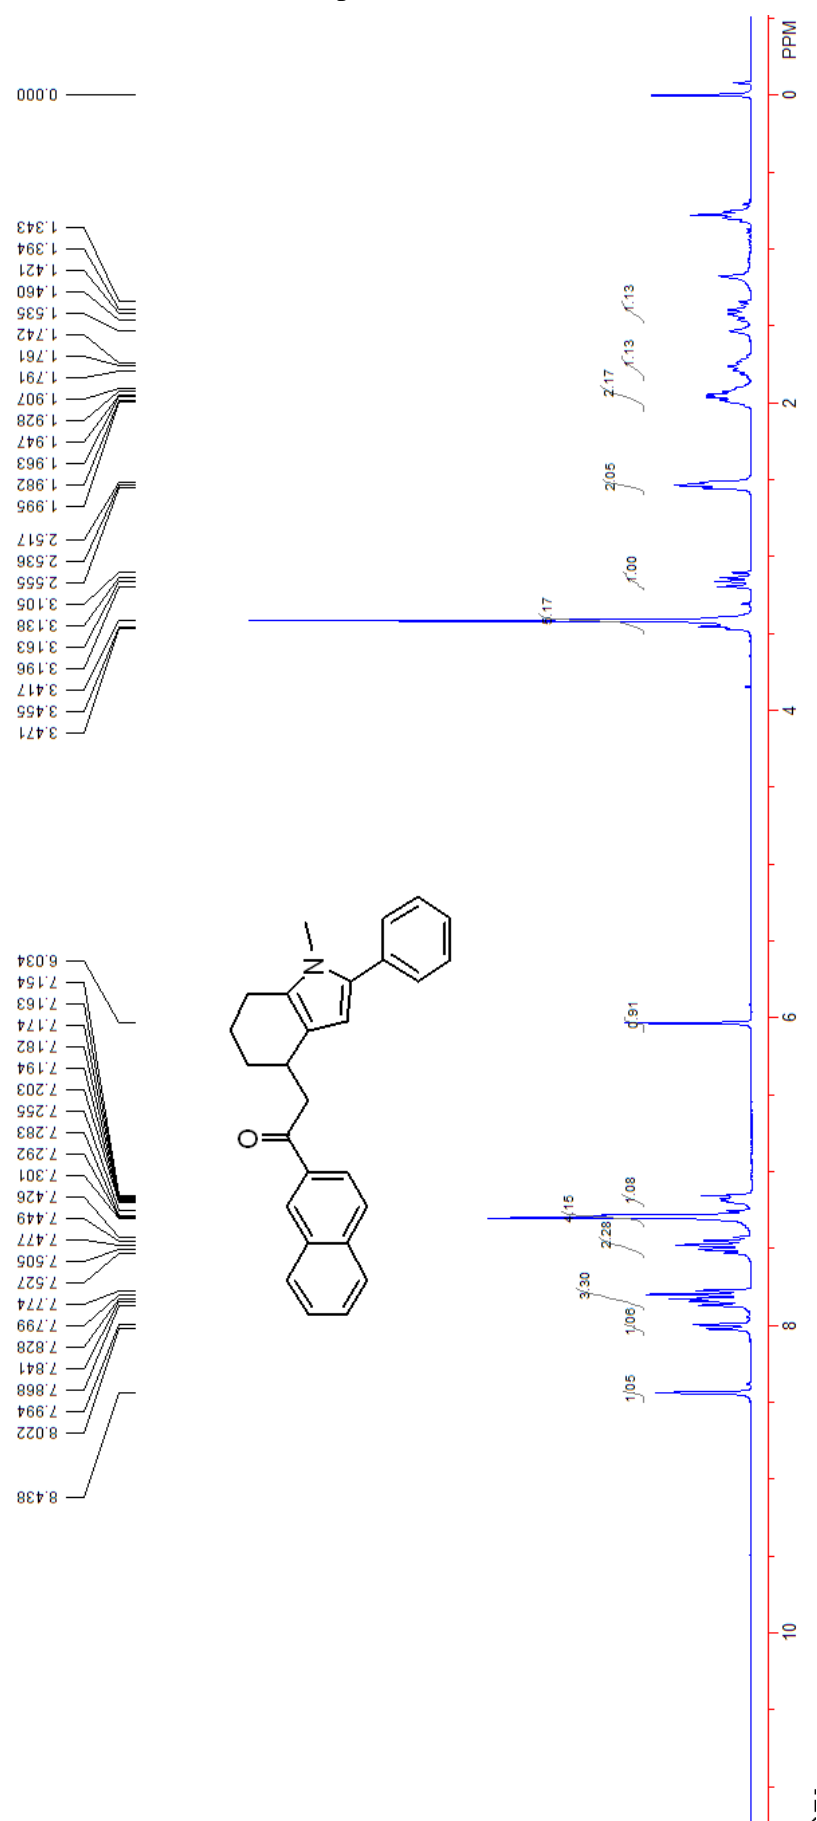

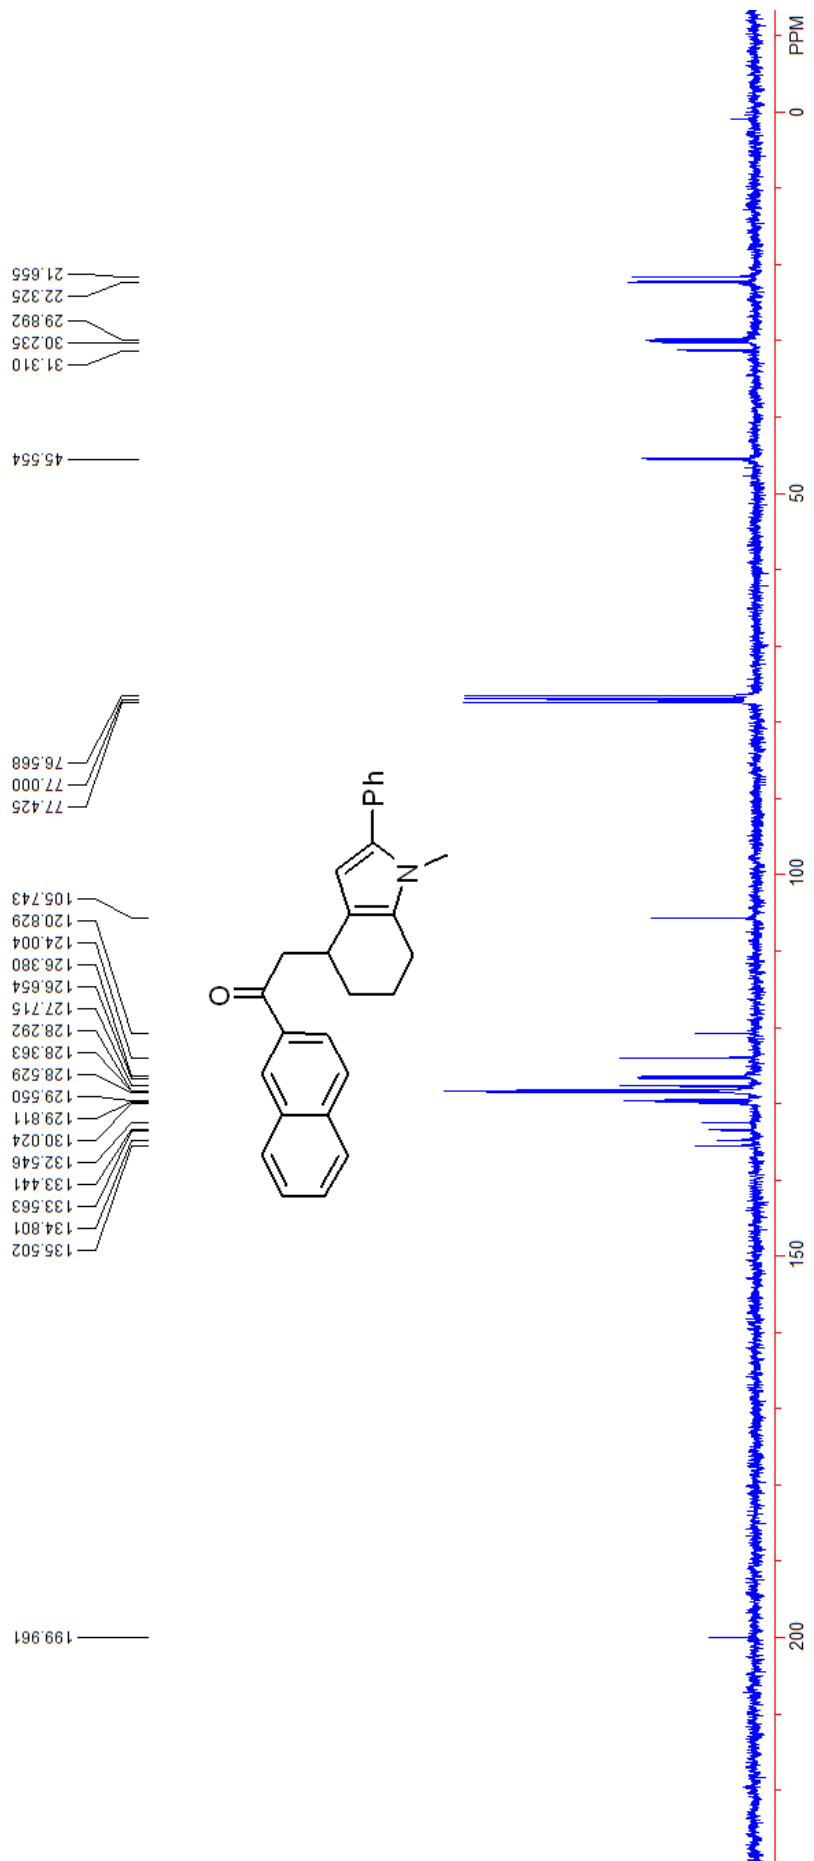

# $^1\text{H}$ NMR and $^{13}\text{C}$ NMR Spectra of **3c**

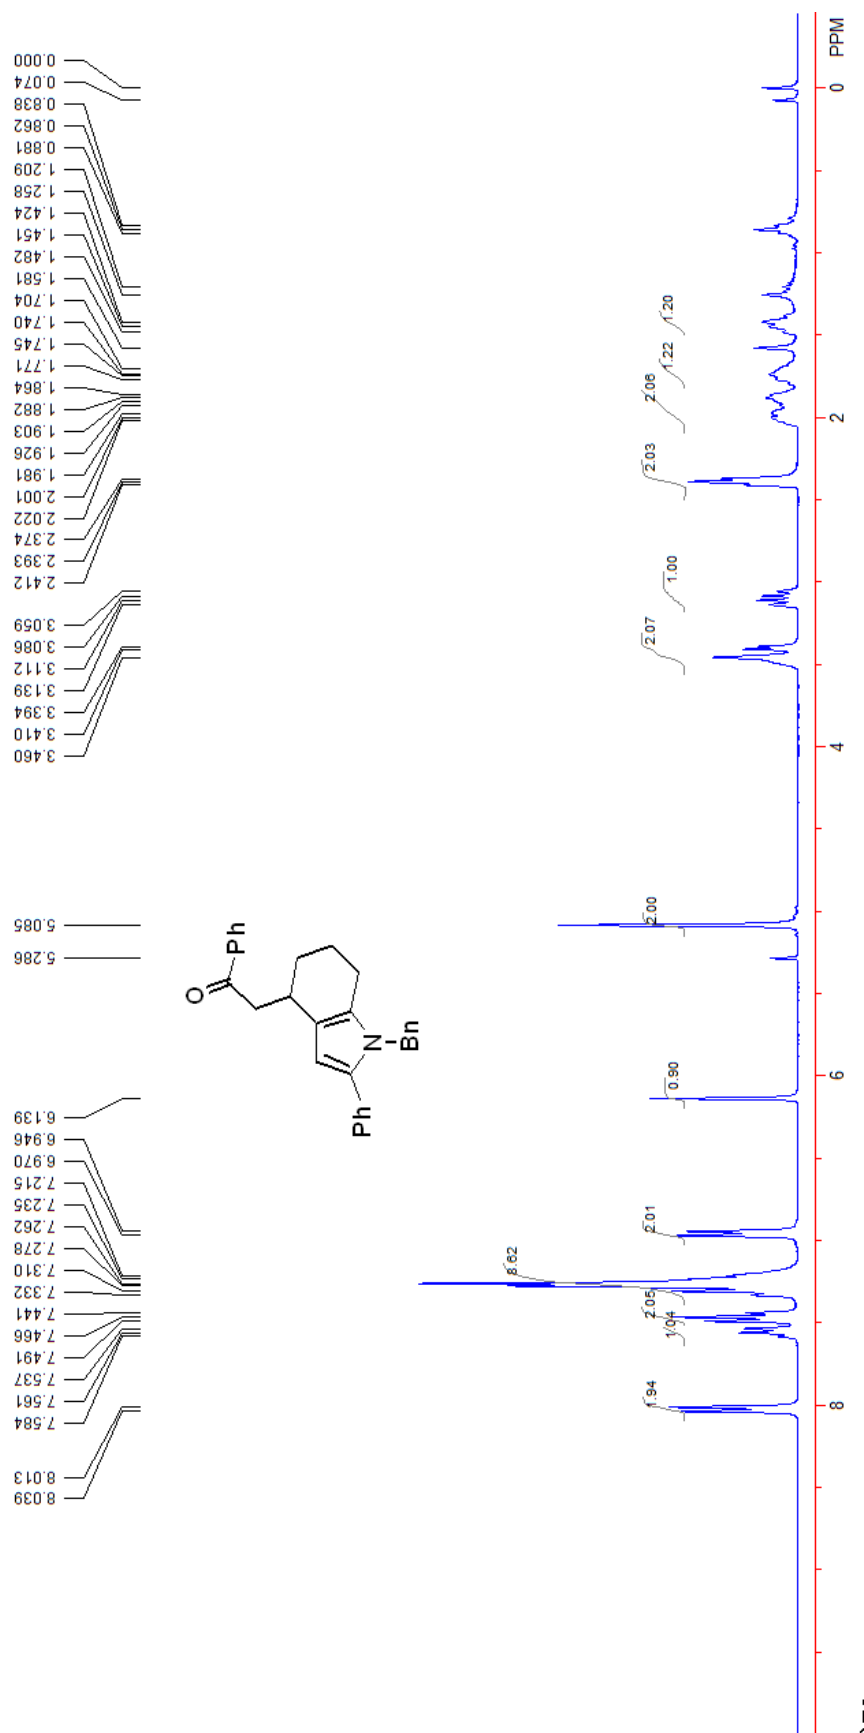

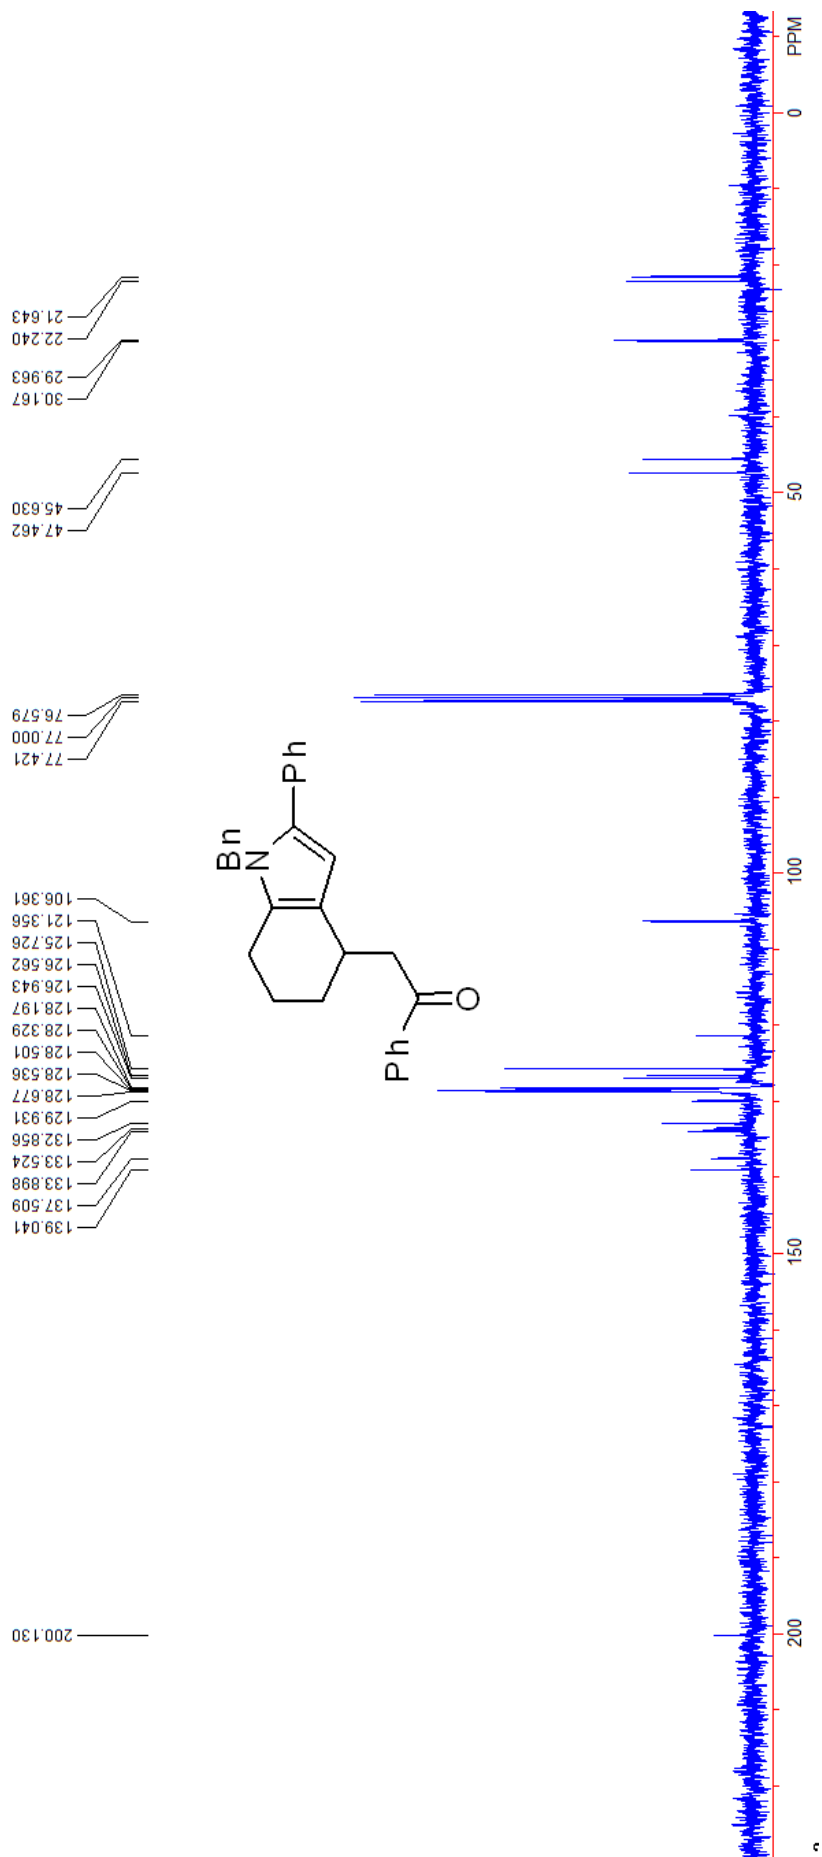

$^1\text{H}$  NMR and  $^{13}\text{C}$  NMR Spectra of **3d**

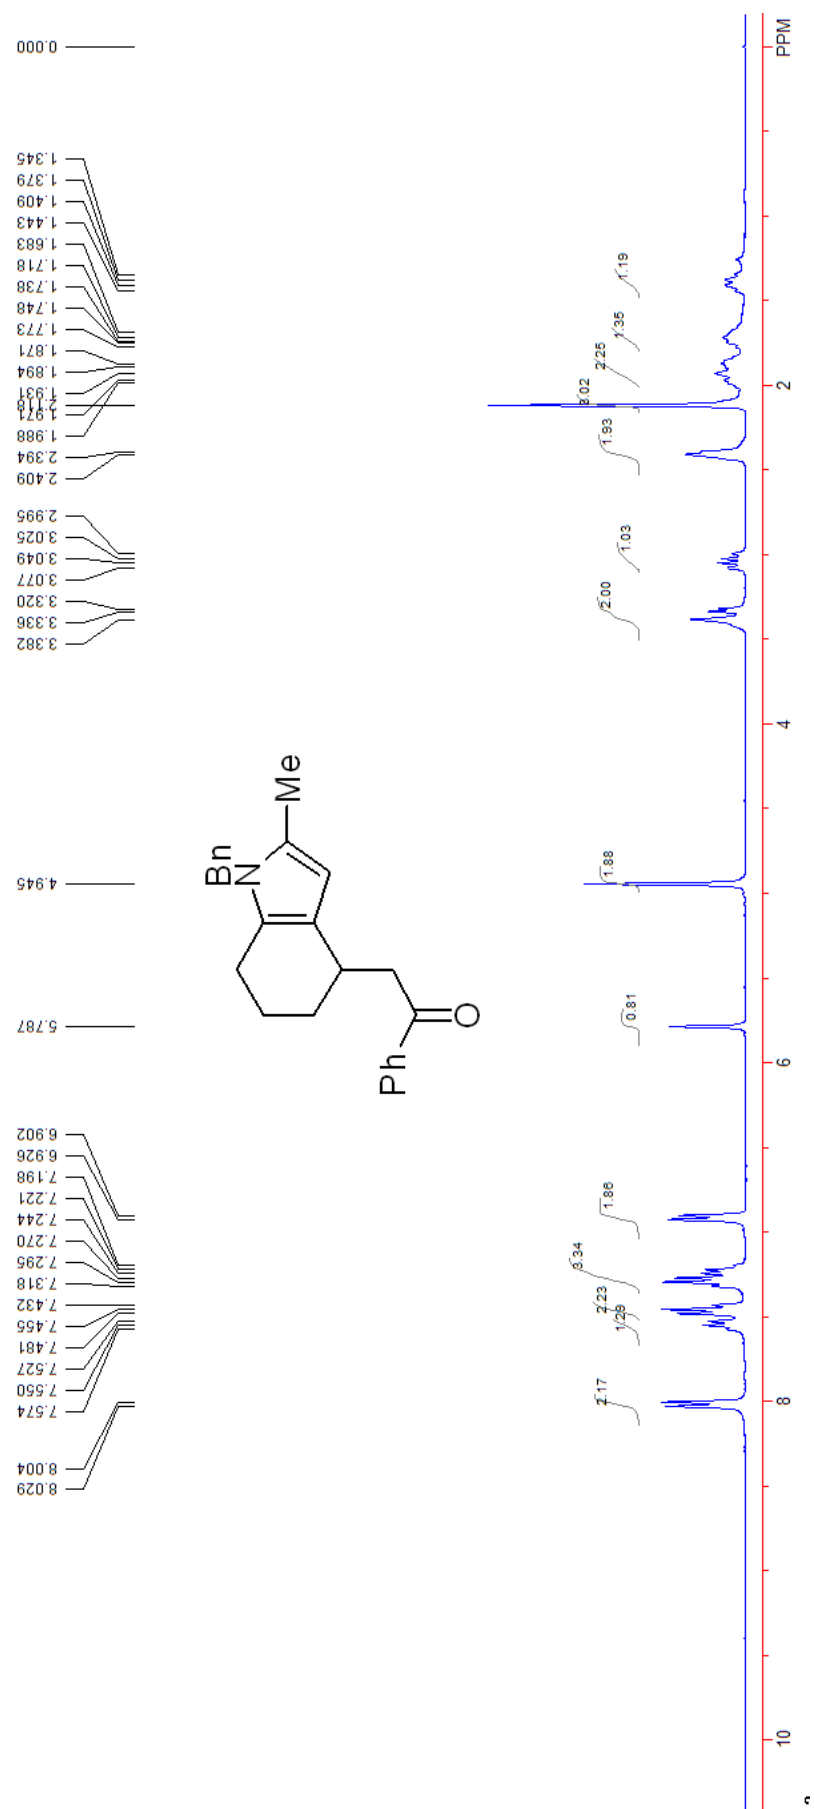

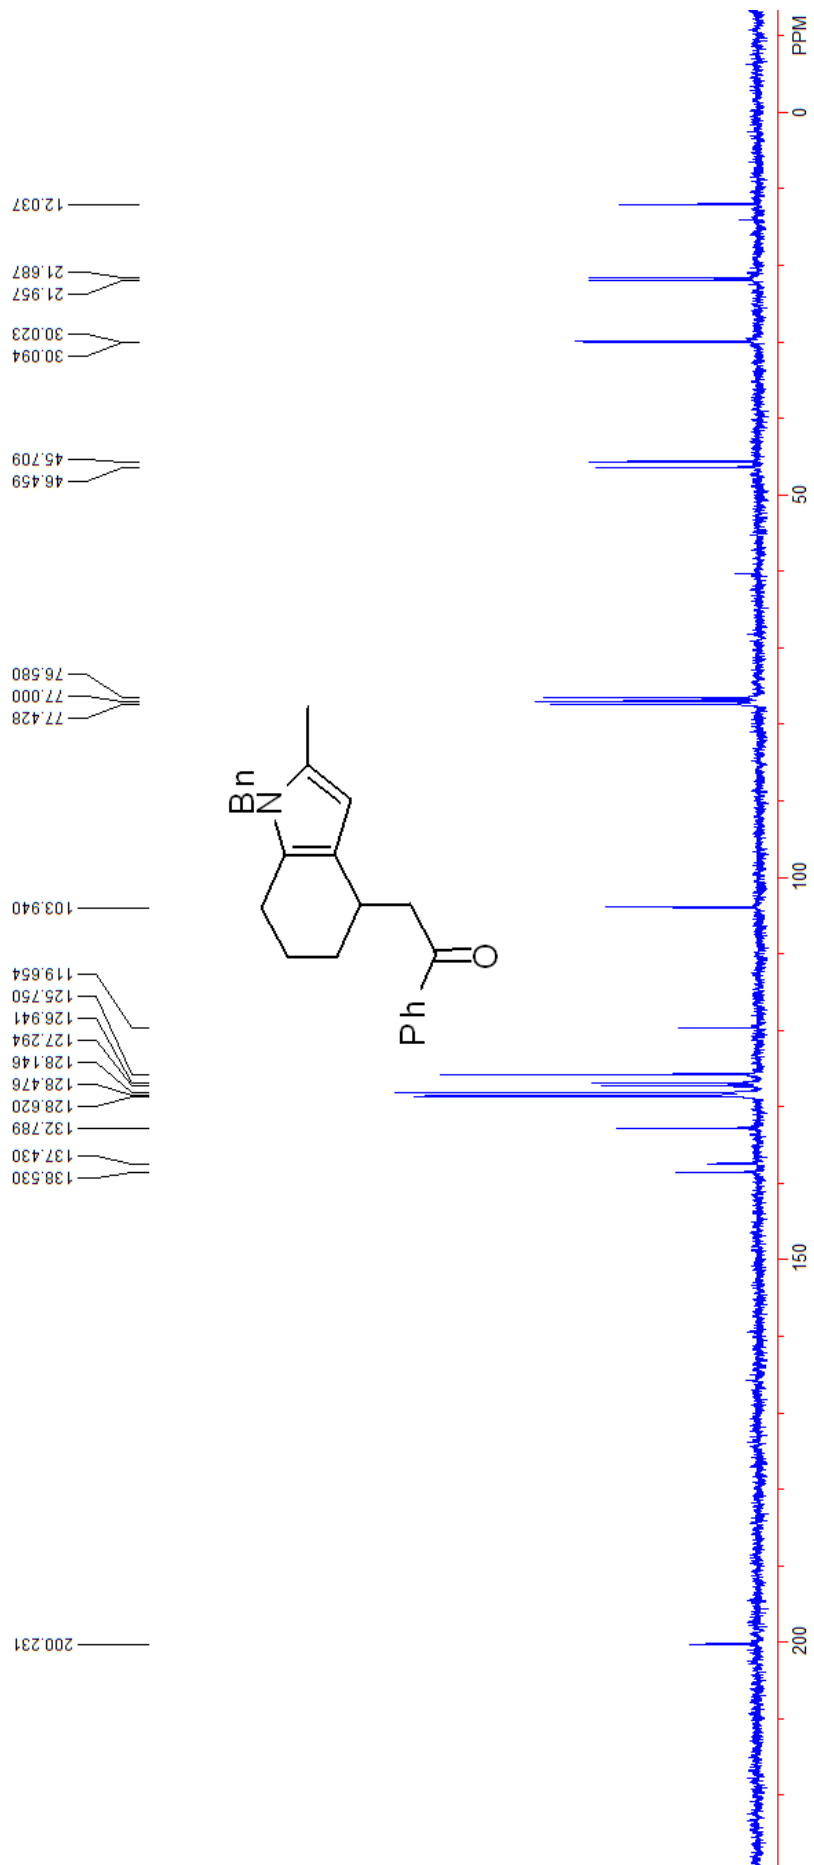



# $^1\text{H}$ NMR and $^{13}\text{C}$ NMR Spectra of **3e**

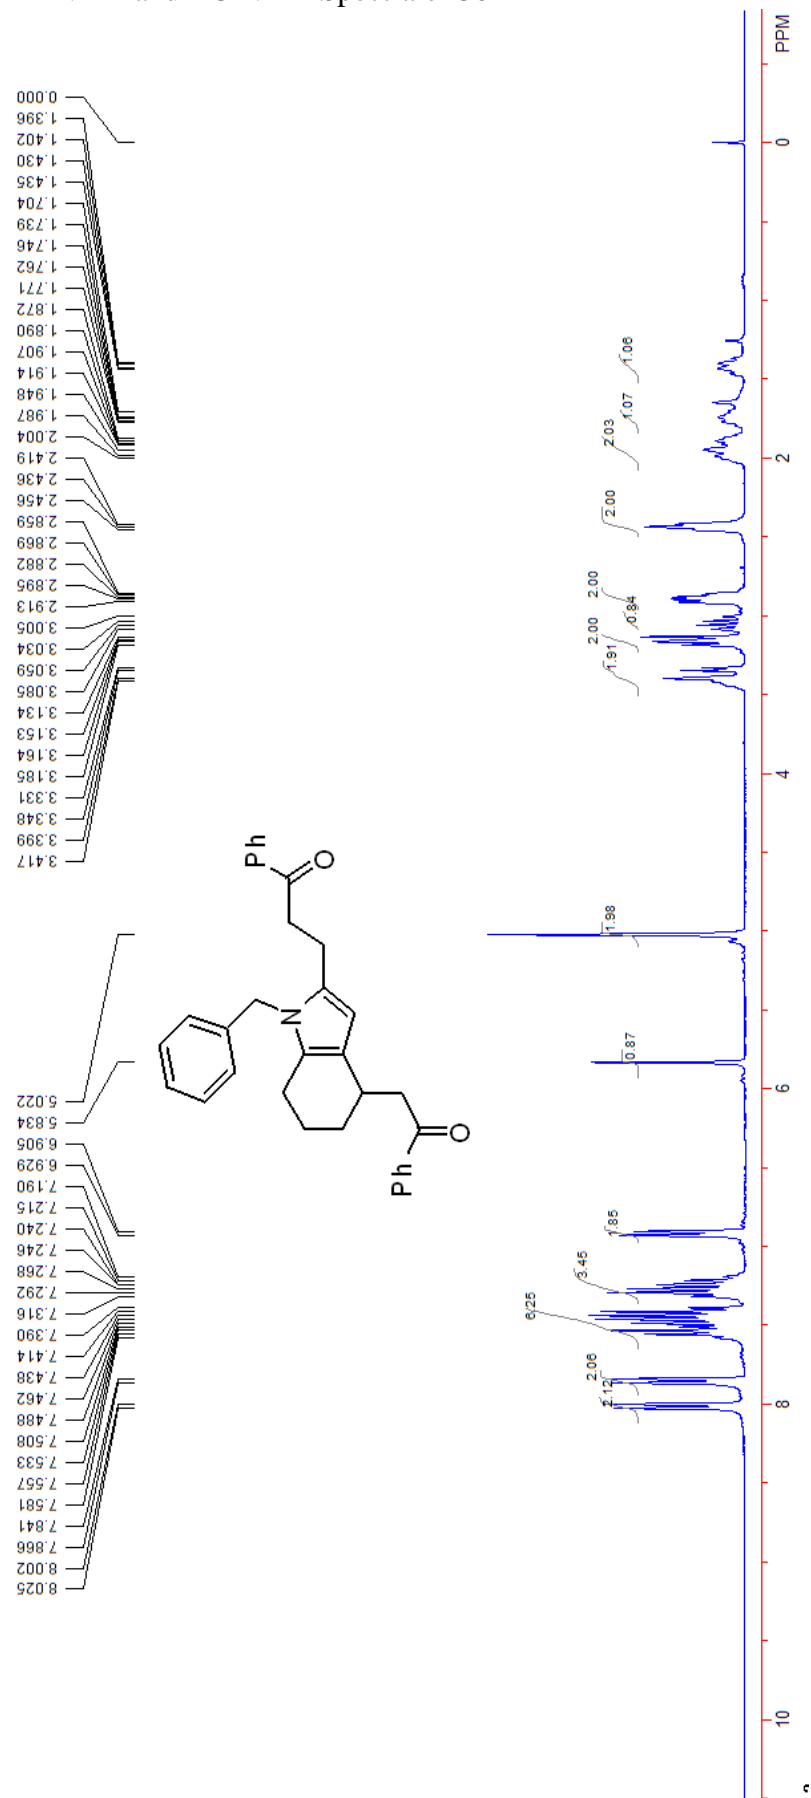

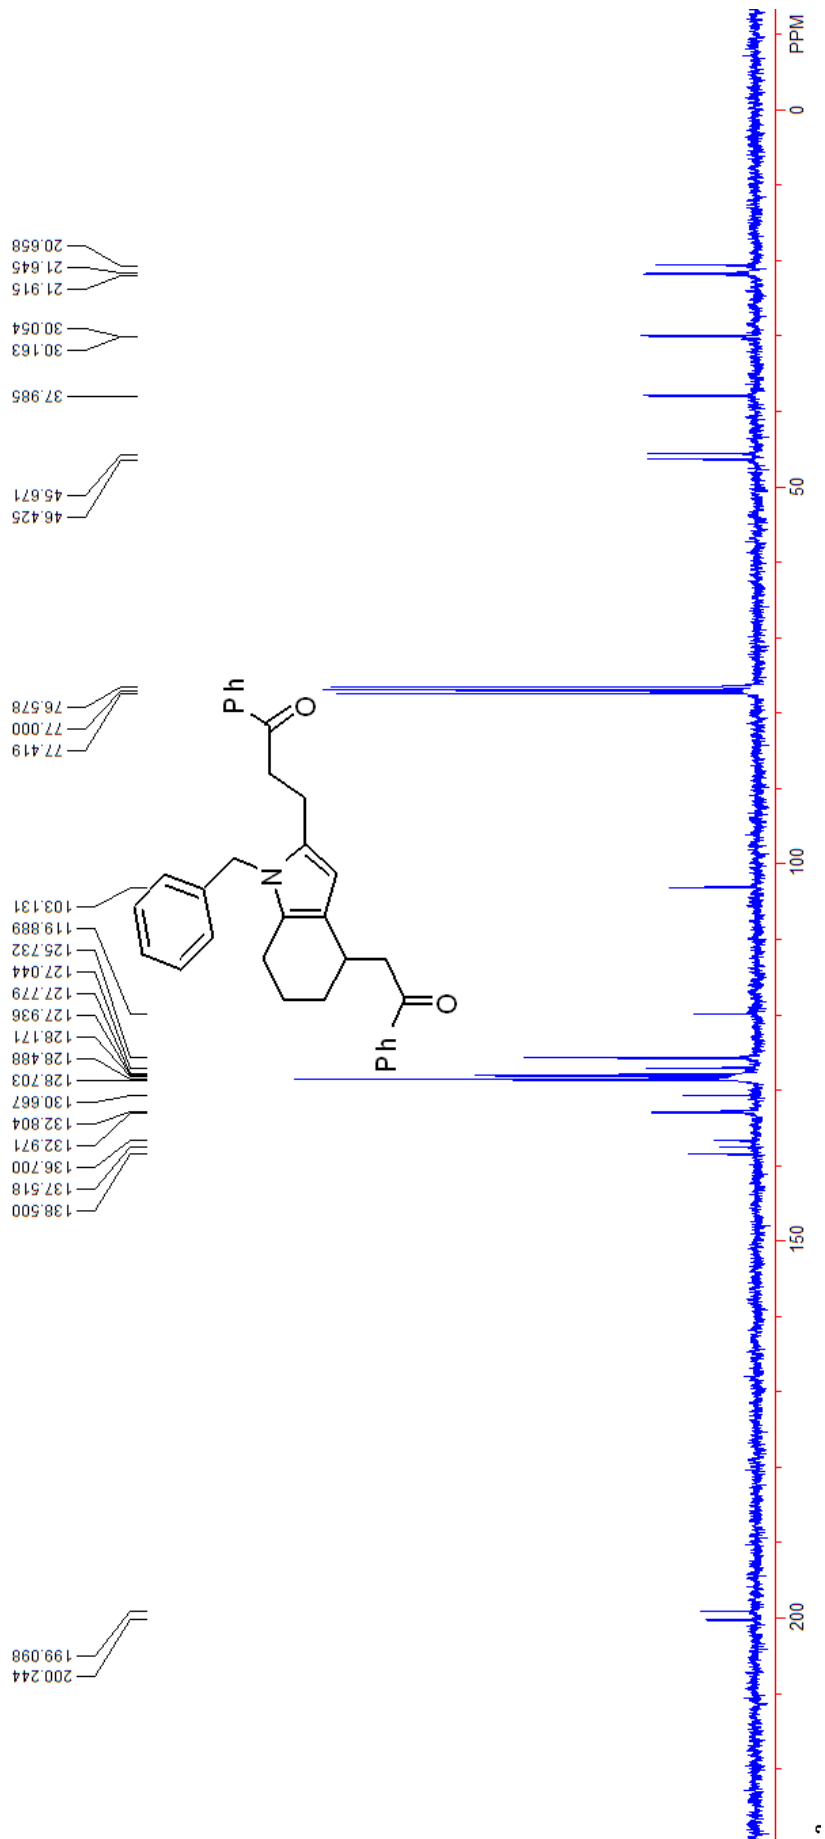

$^1\text{H}$  NMR and  $^{13}\text{C}$  NMR Spectra of **3f**

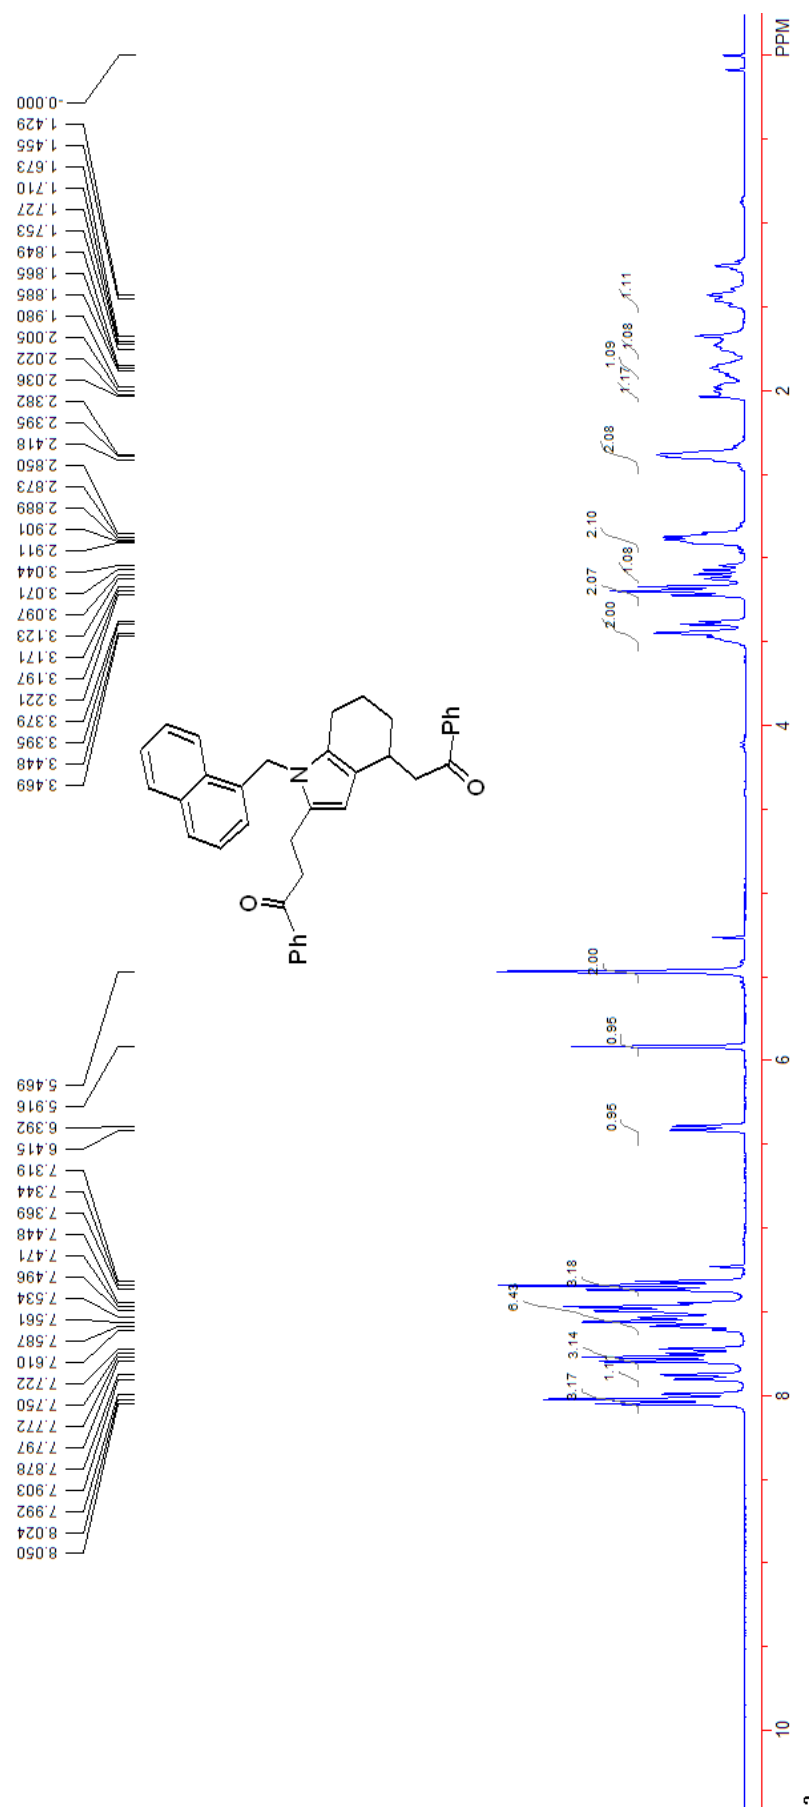

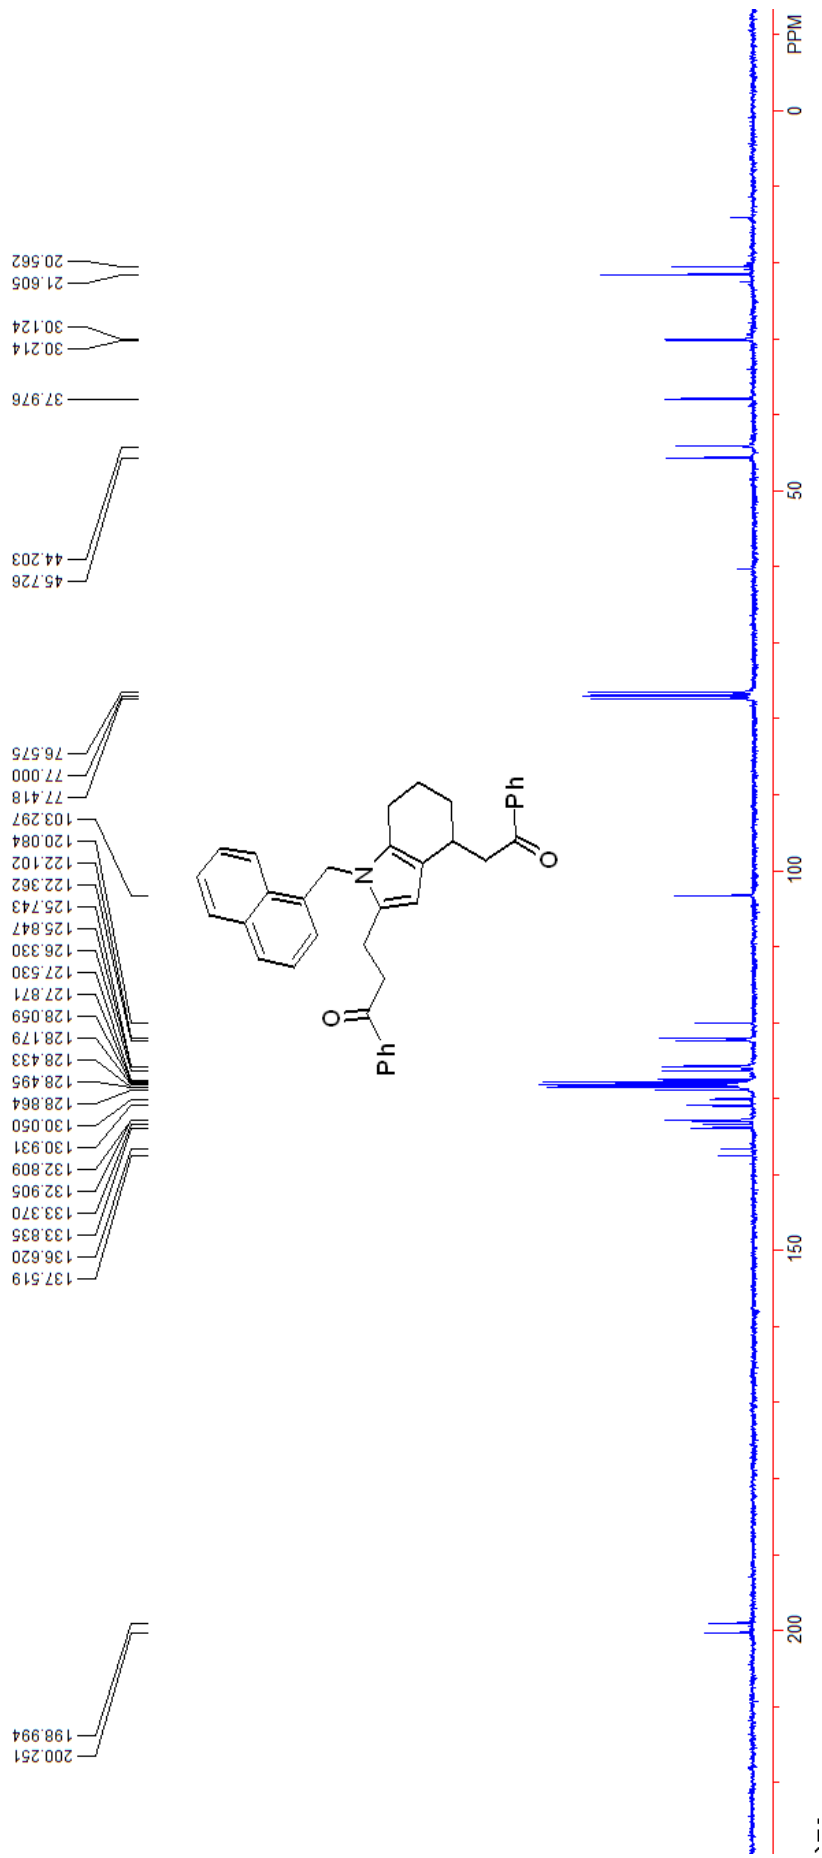

$^1\text{H}$  NMR and  $^{13}\text{C}$  NMR Spectra of **3g**

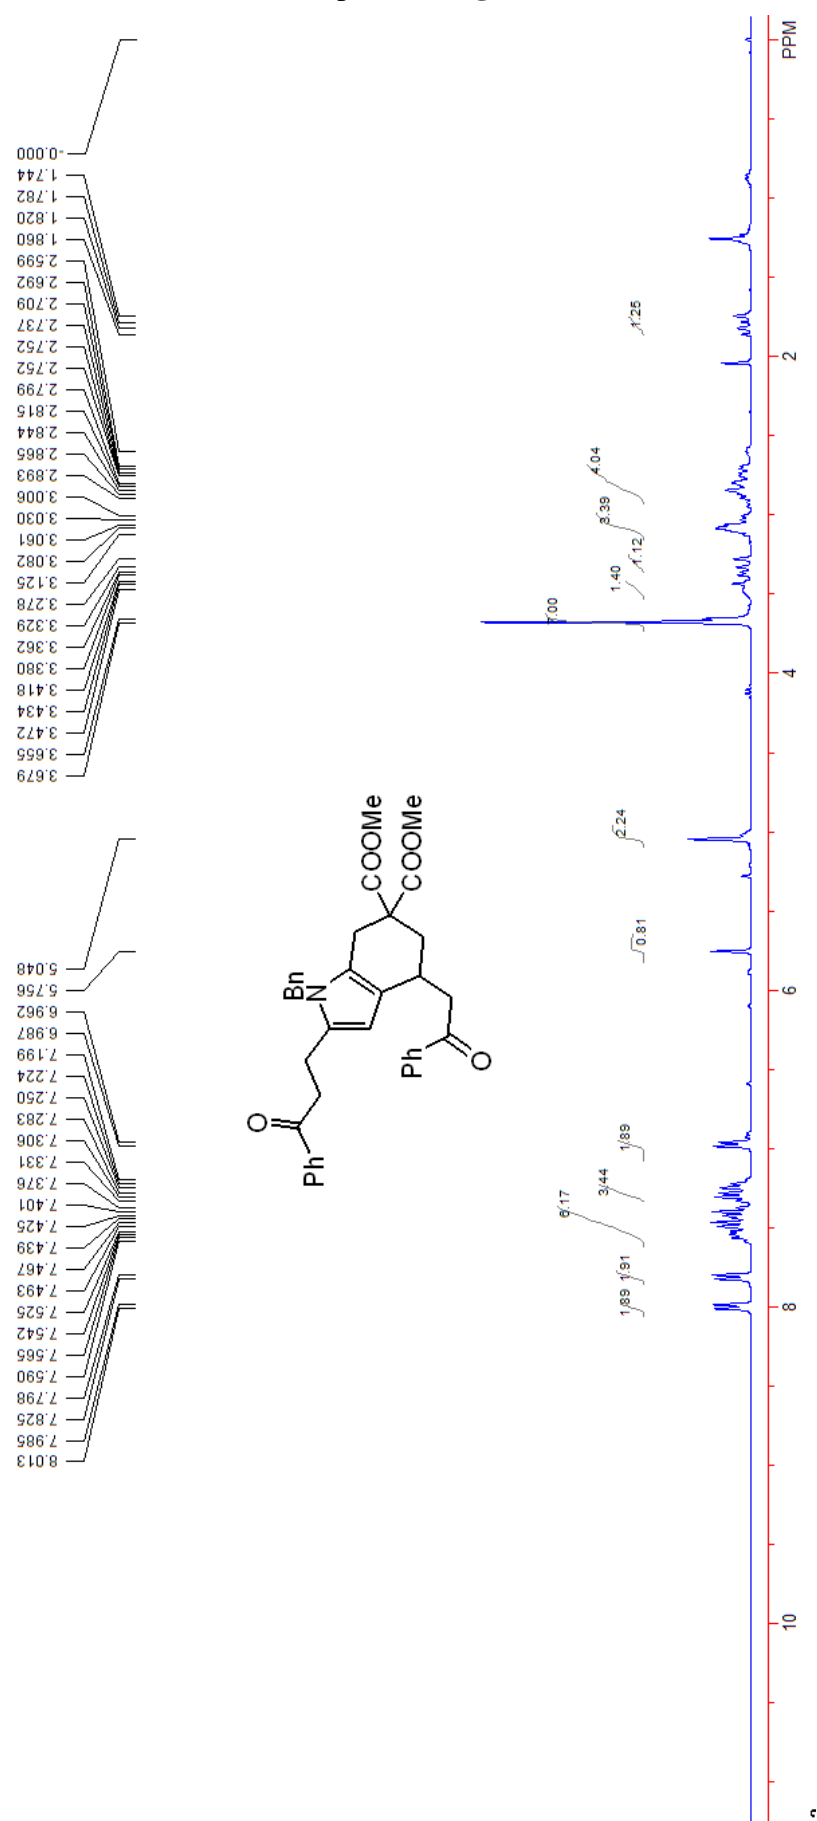

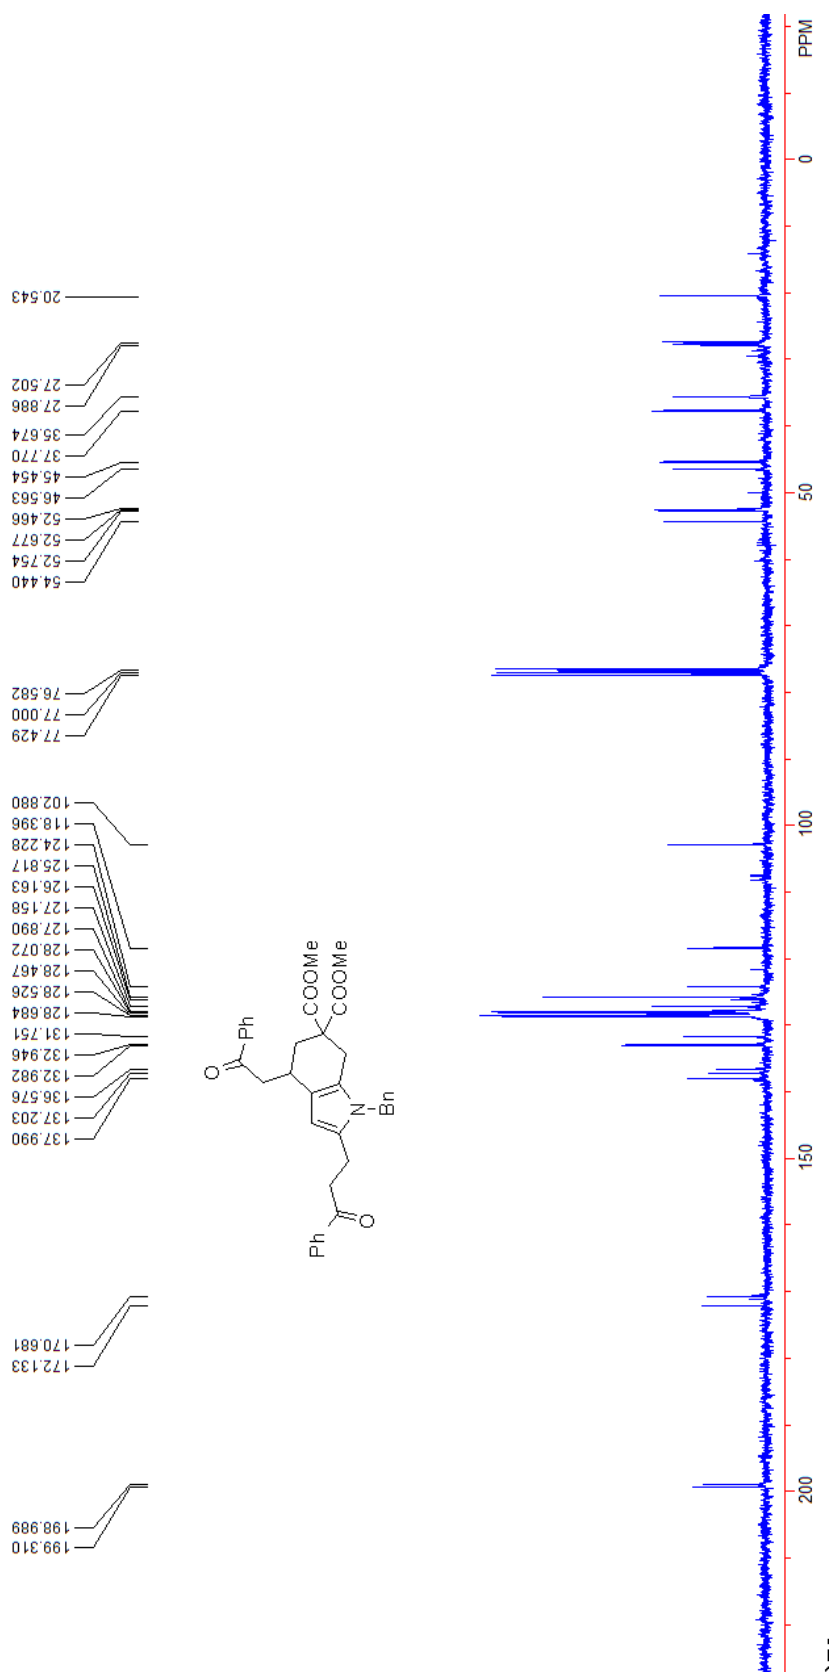

<sup>1</sup>H NMR and <sup>13</sup>C NMR Spectra of **3h**

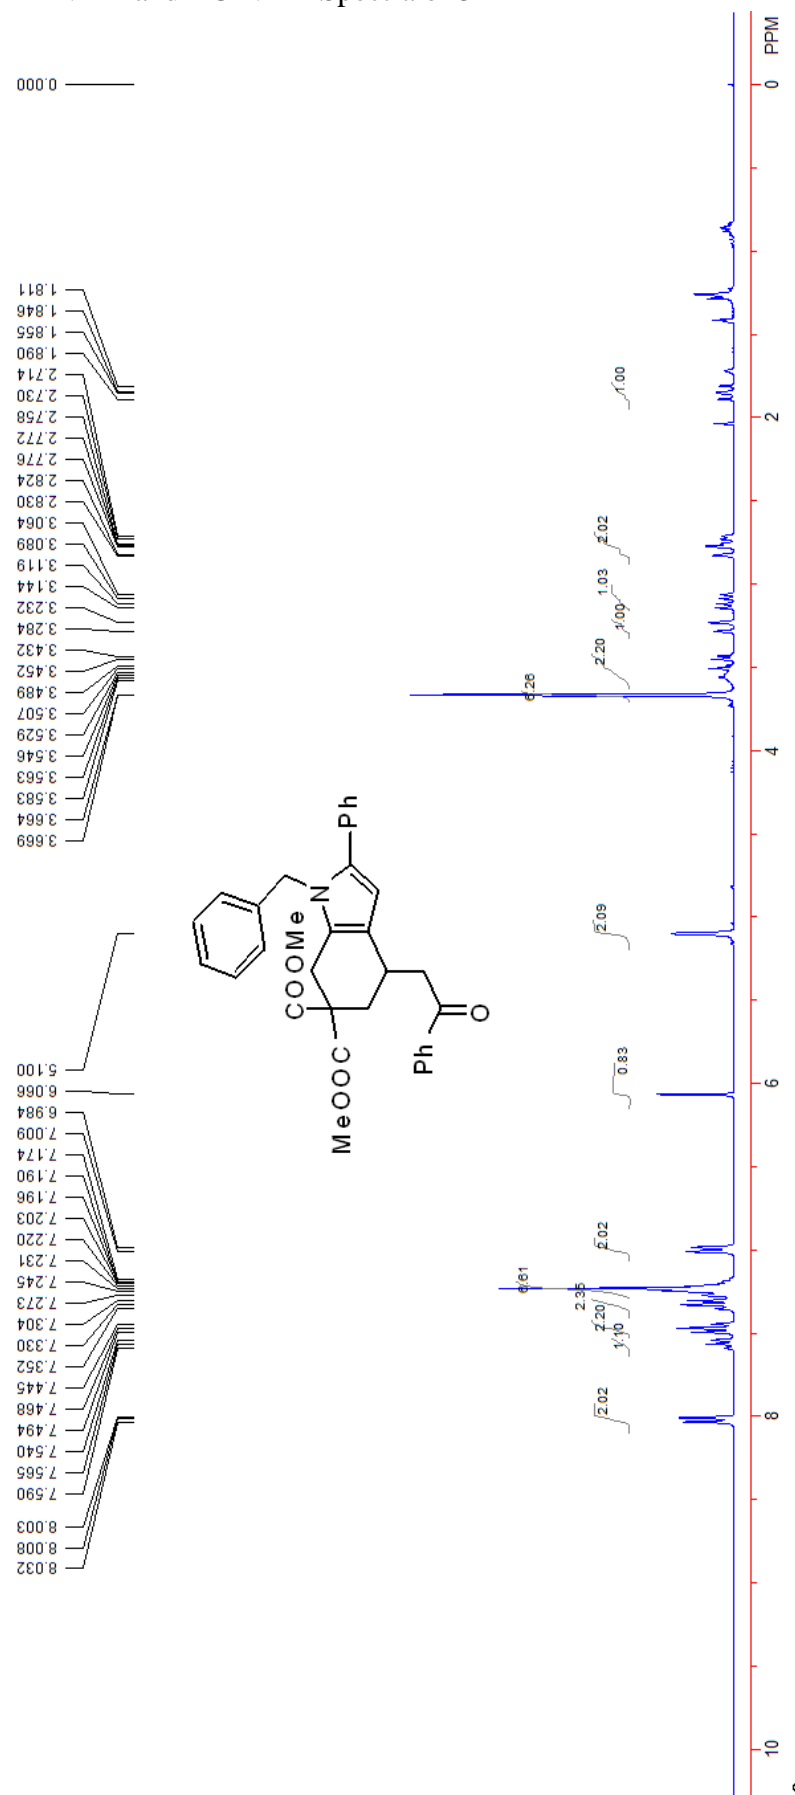

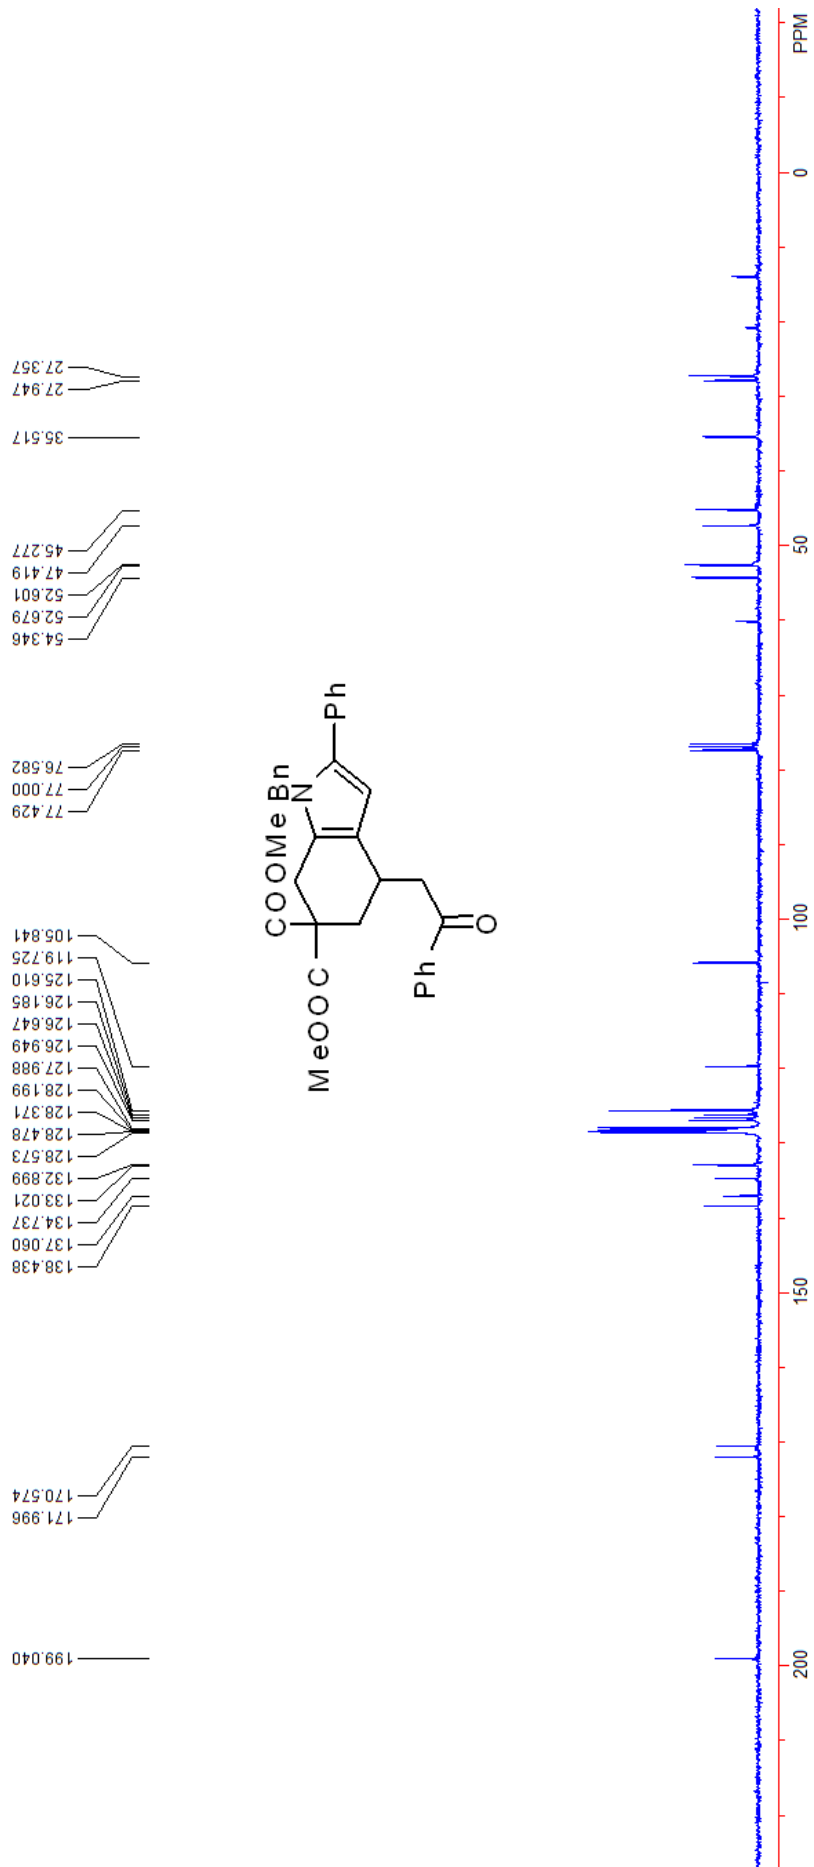



$^1\text{H}$  NMR and  $^{13}\text{C}$  NMR Spectra of **3i**

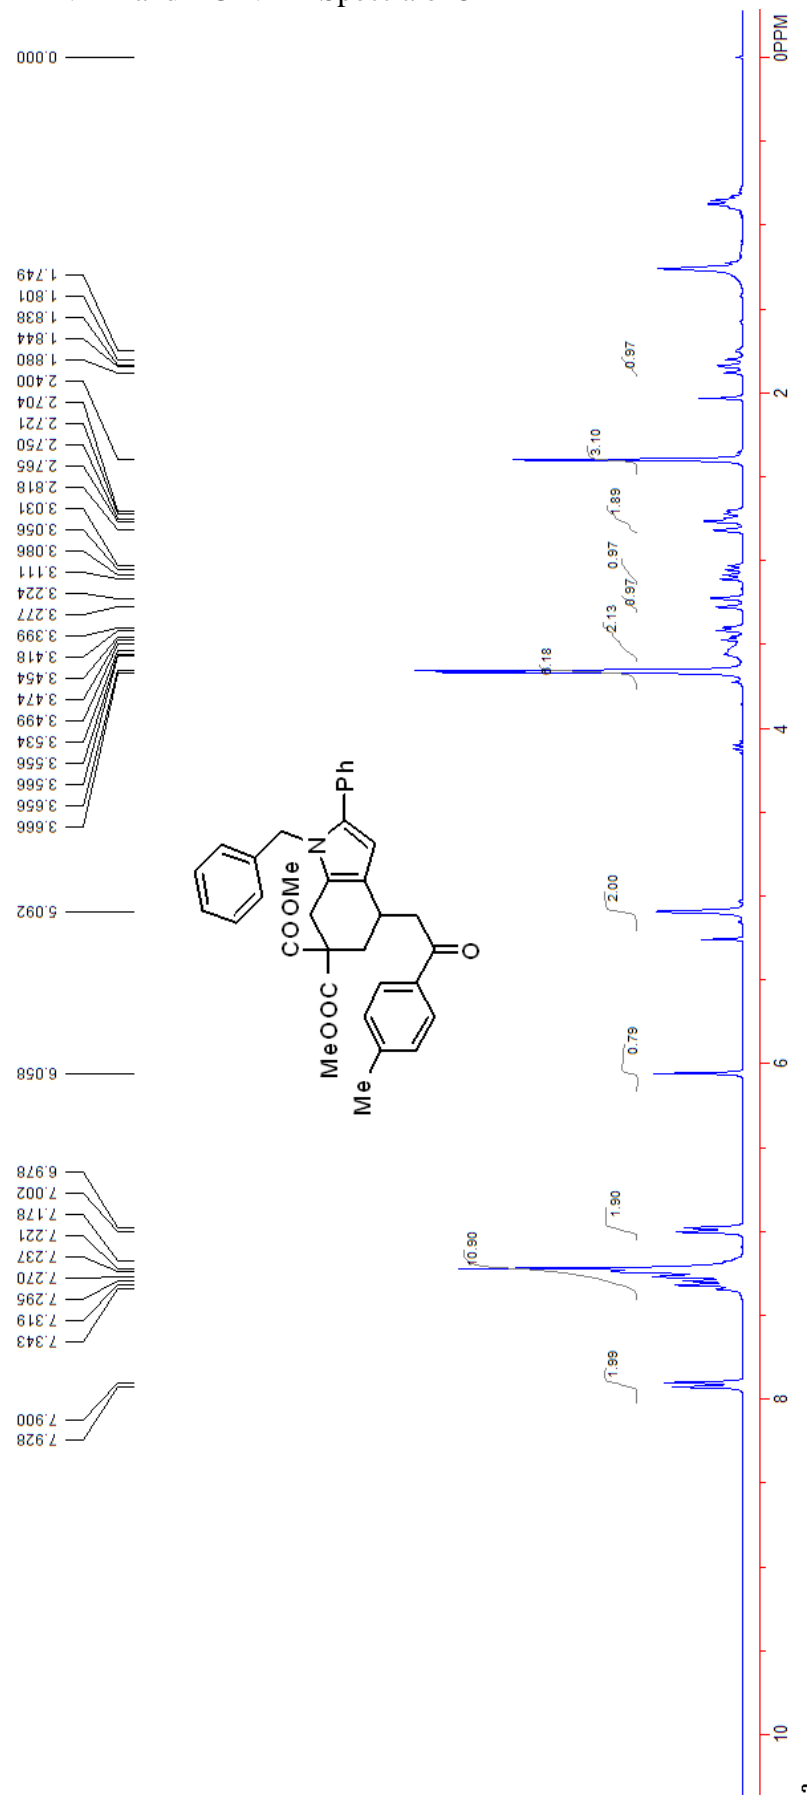

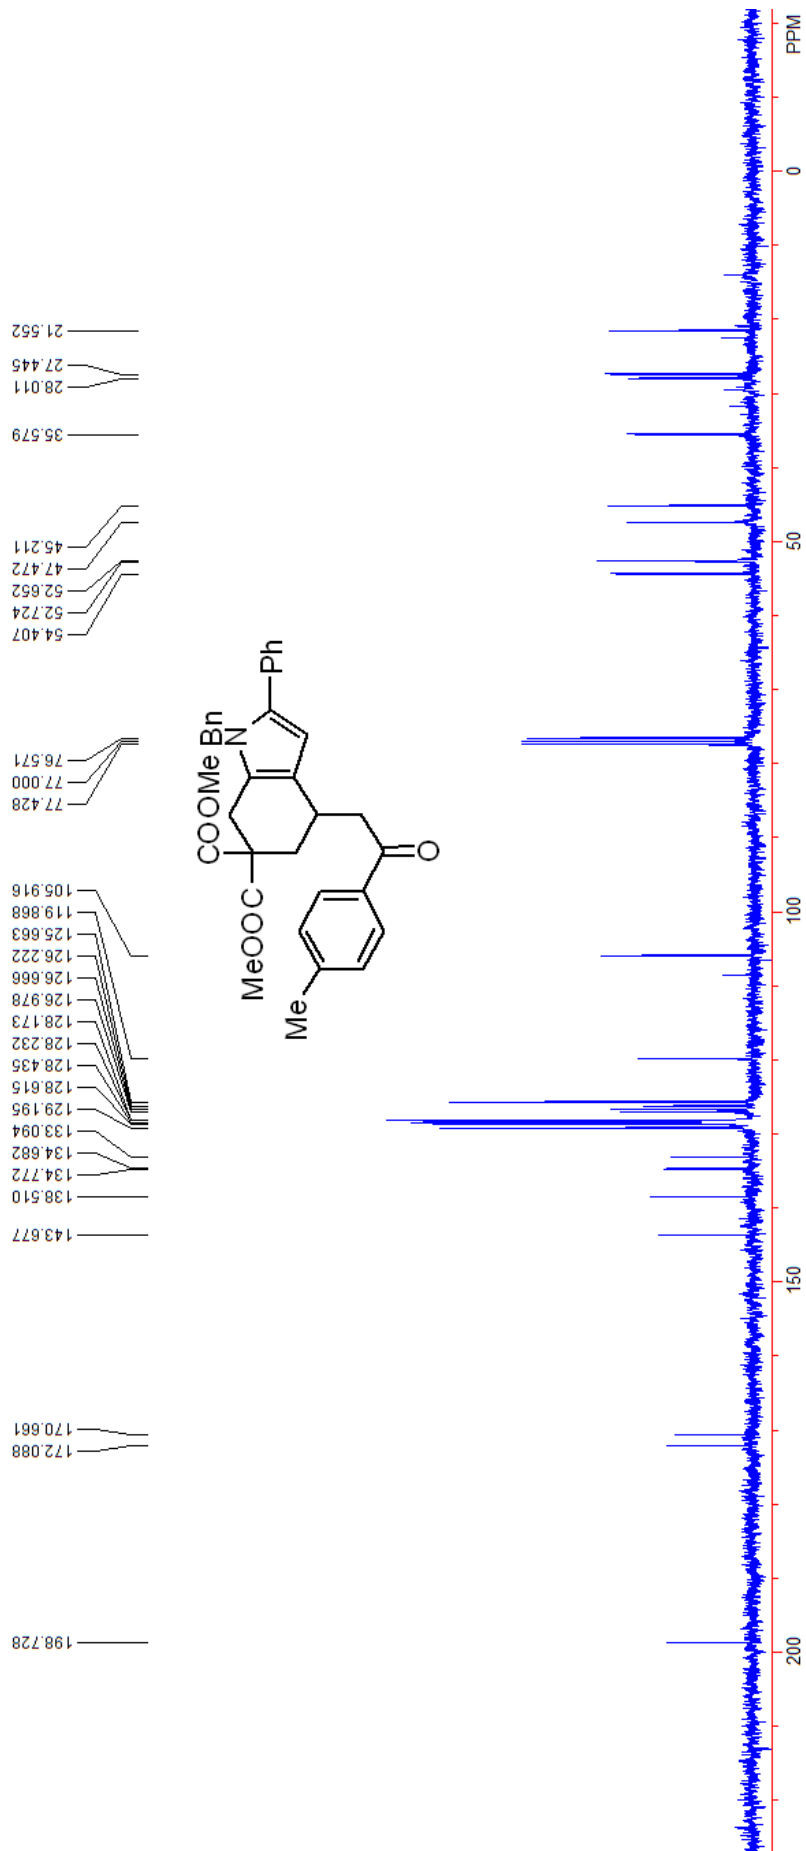

<sup>1</sup>H NMR and <sup>13</sup>C NMR Spectra of **3j**

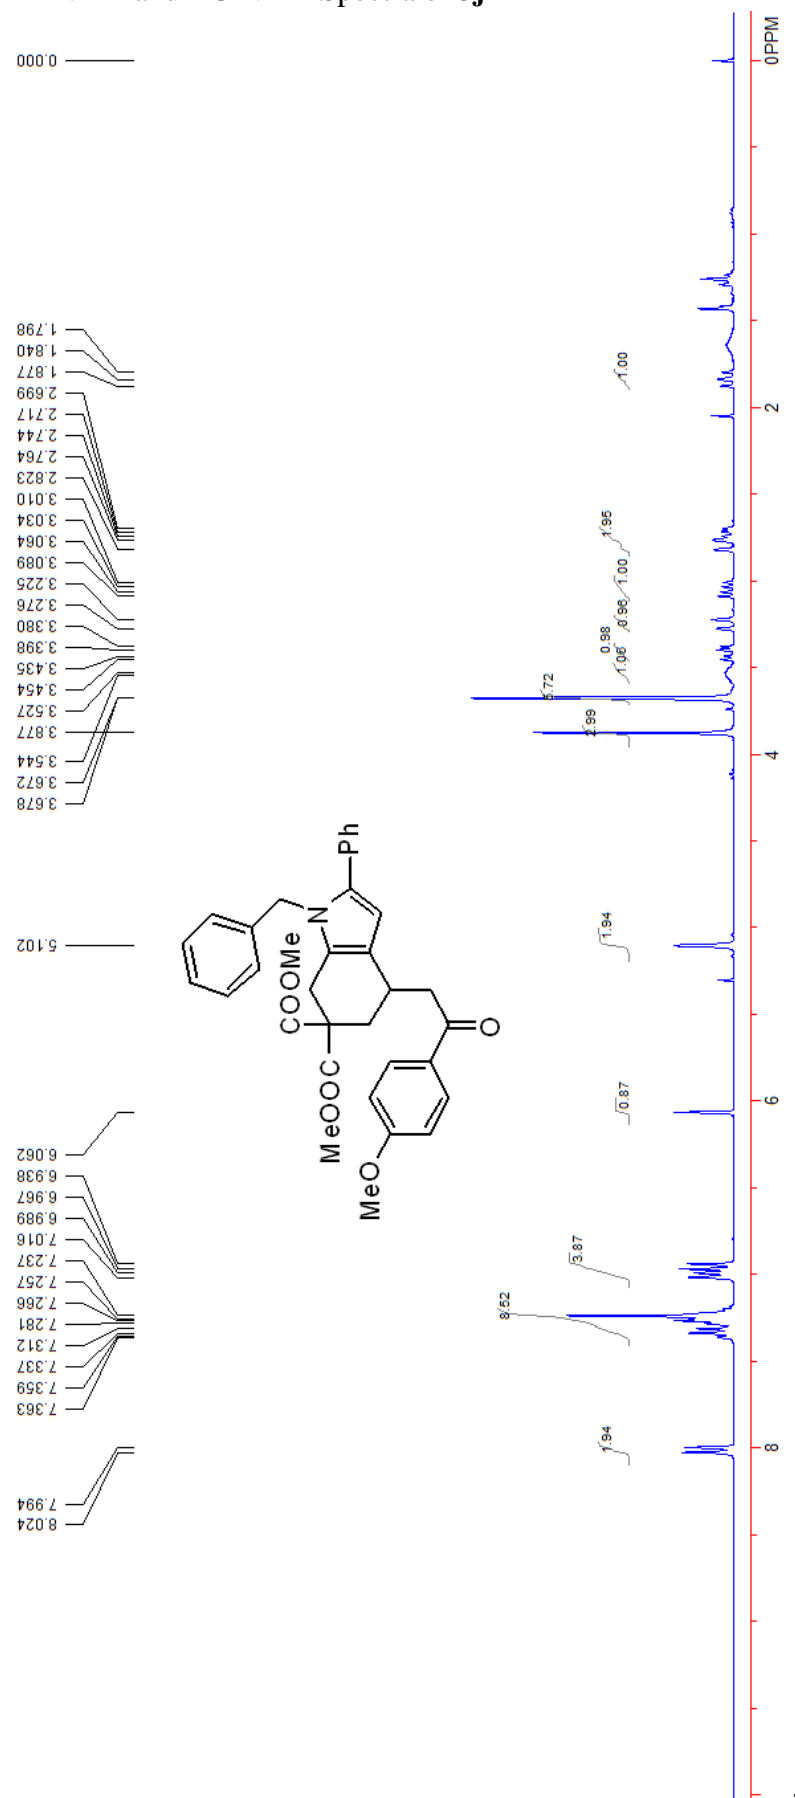

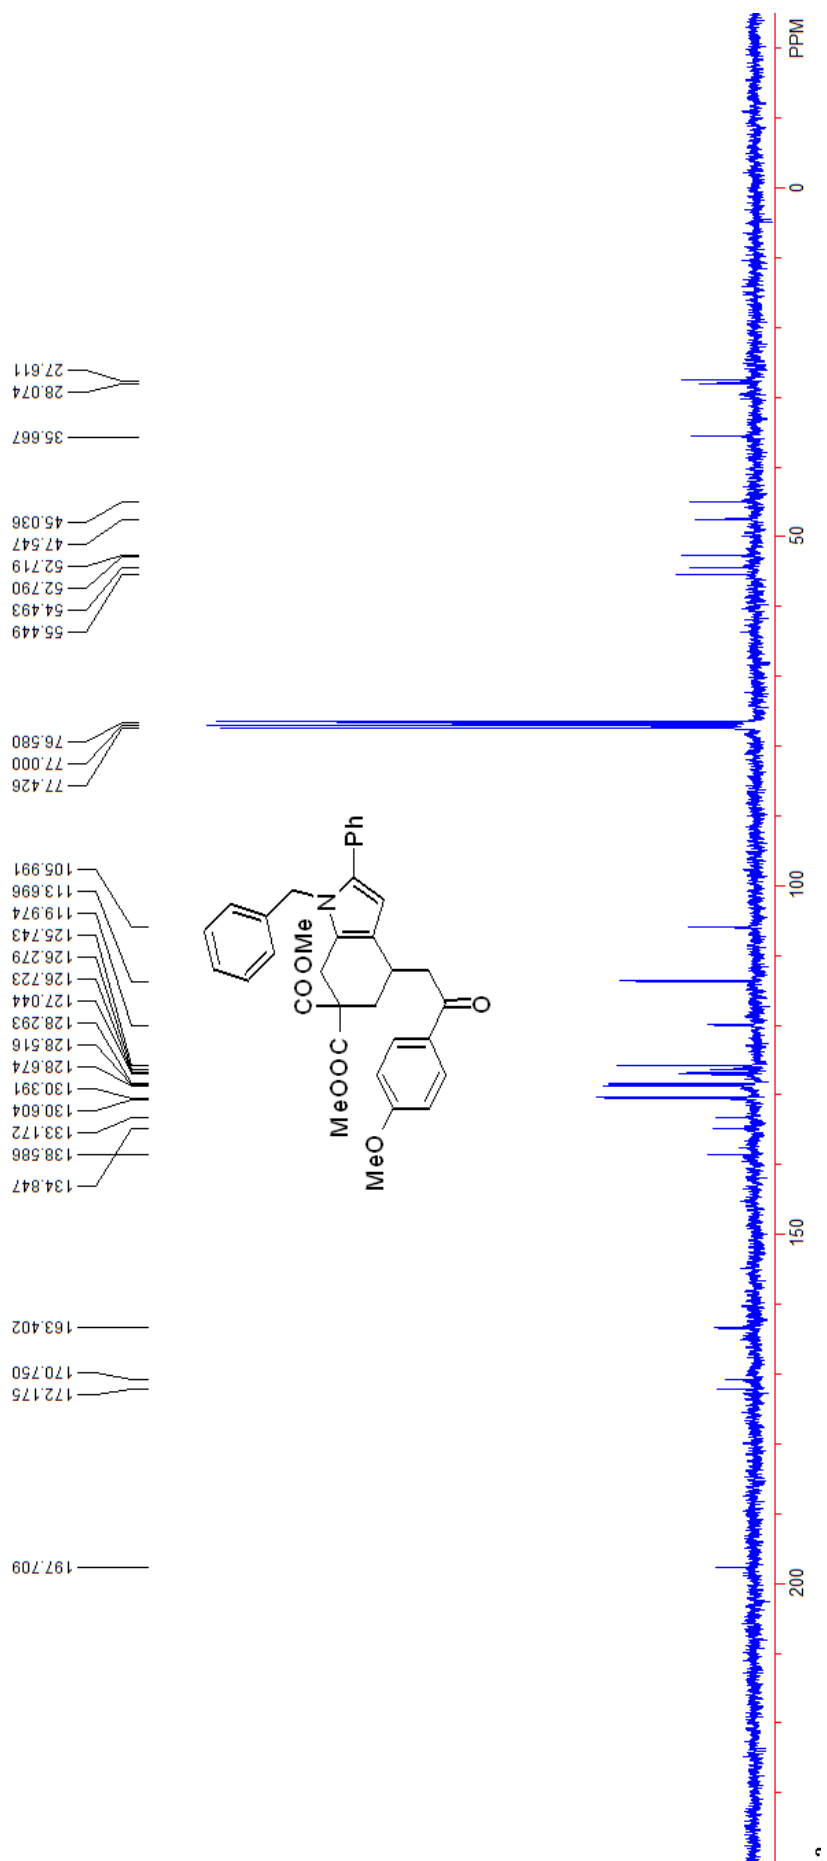

# $^1\text{H}$ NMR and $^{13}\text{C}$ NMR Spectra of **3k**

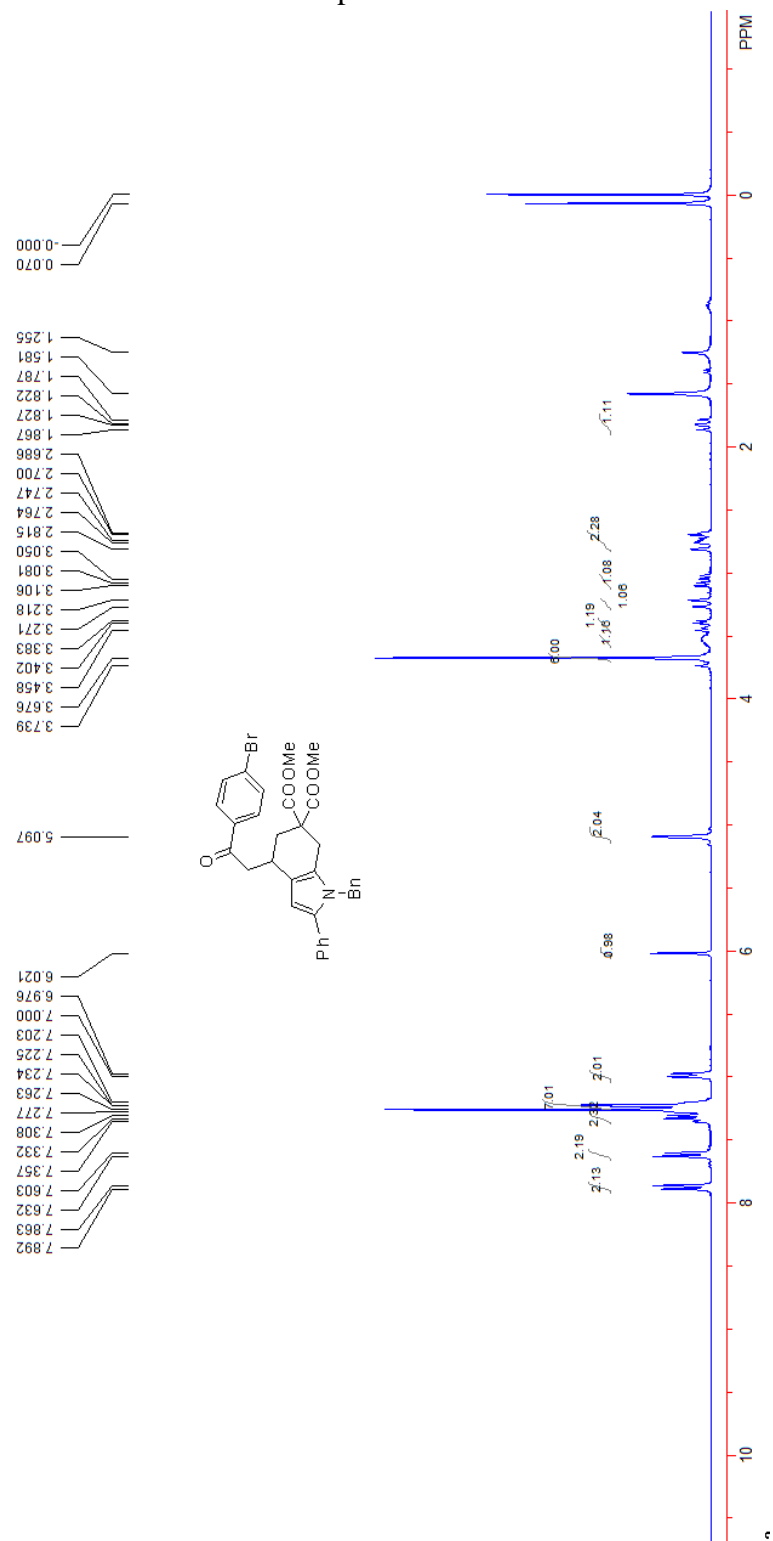

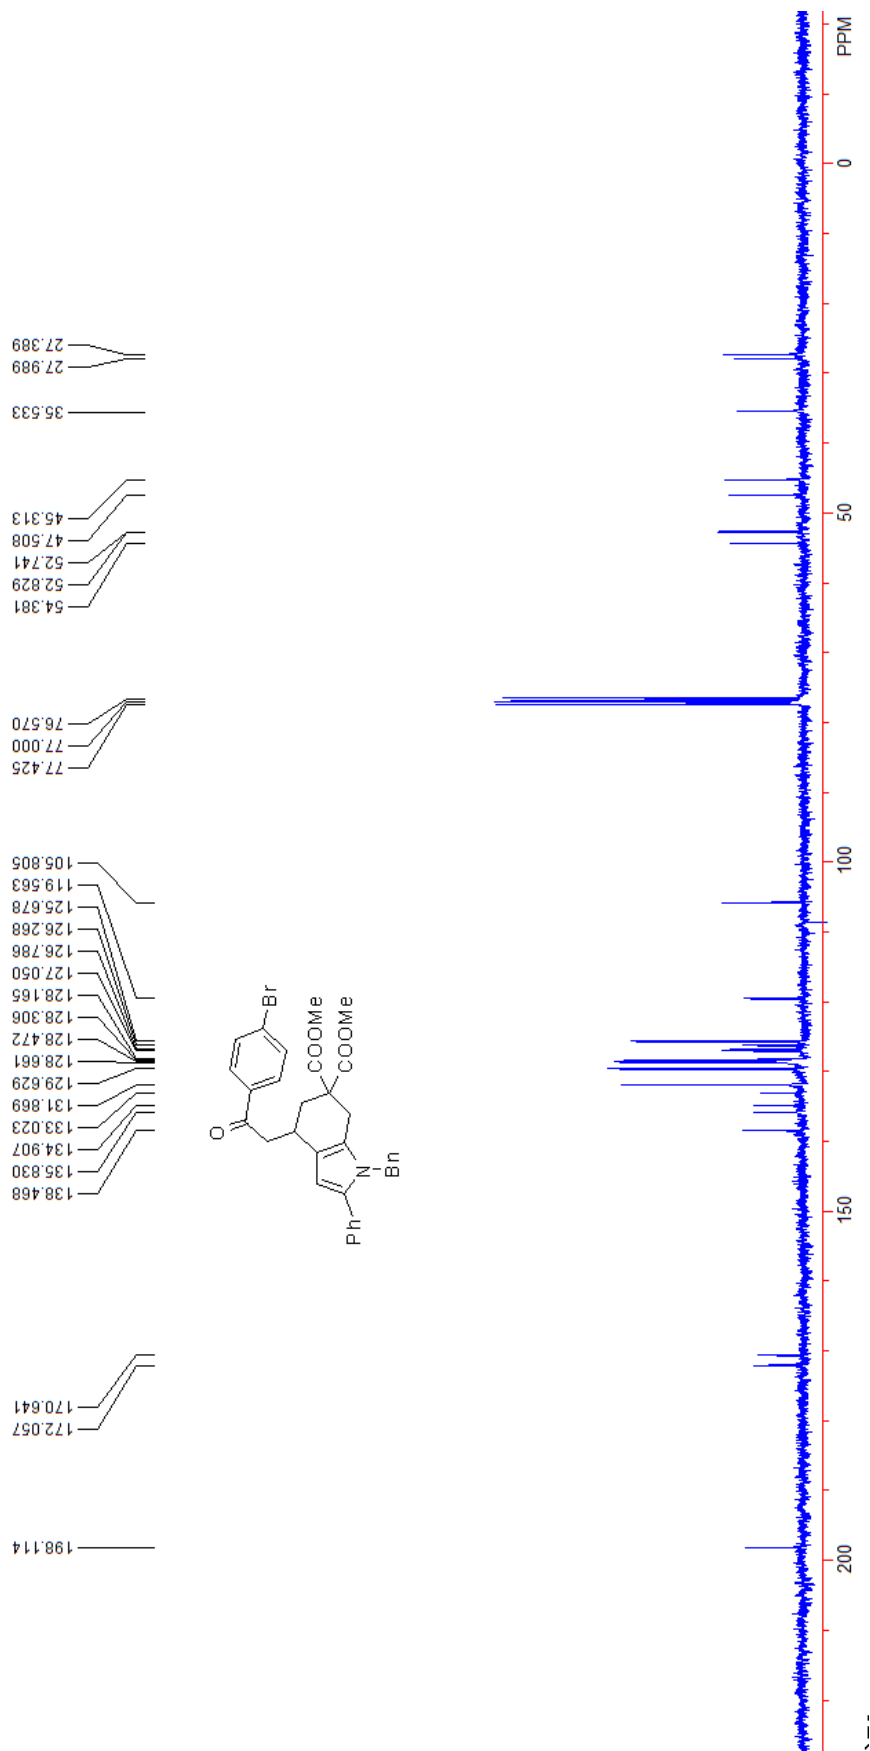

$^1\text{H}$  NMR and  $^{13}\text{C}$  NMR Spectra of **31**

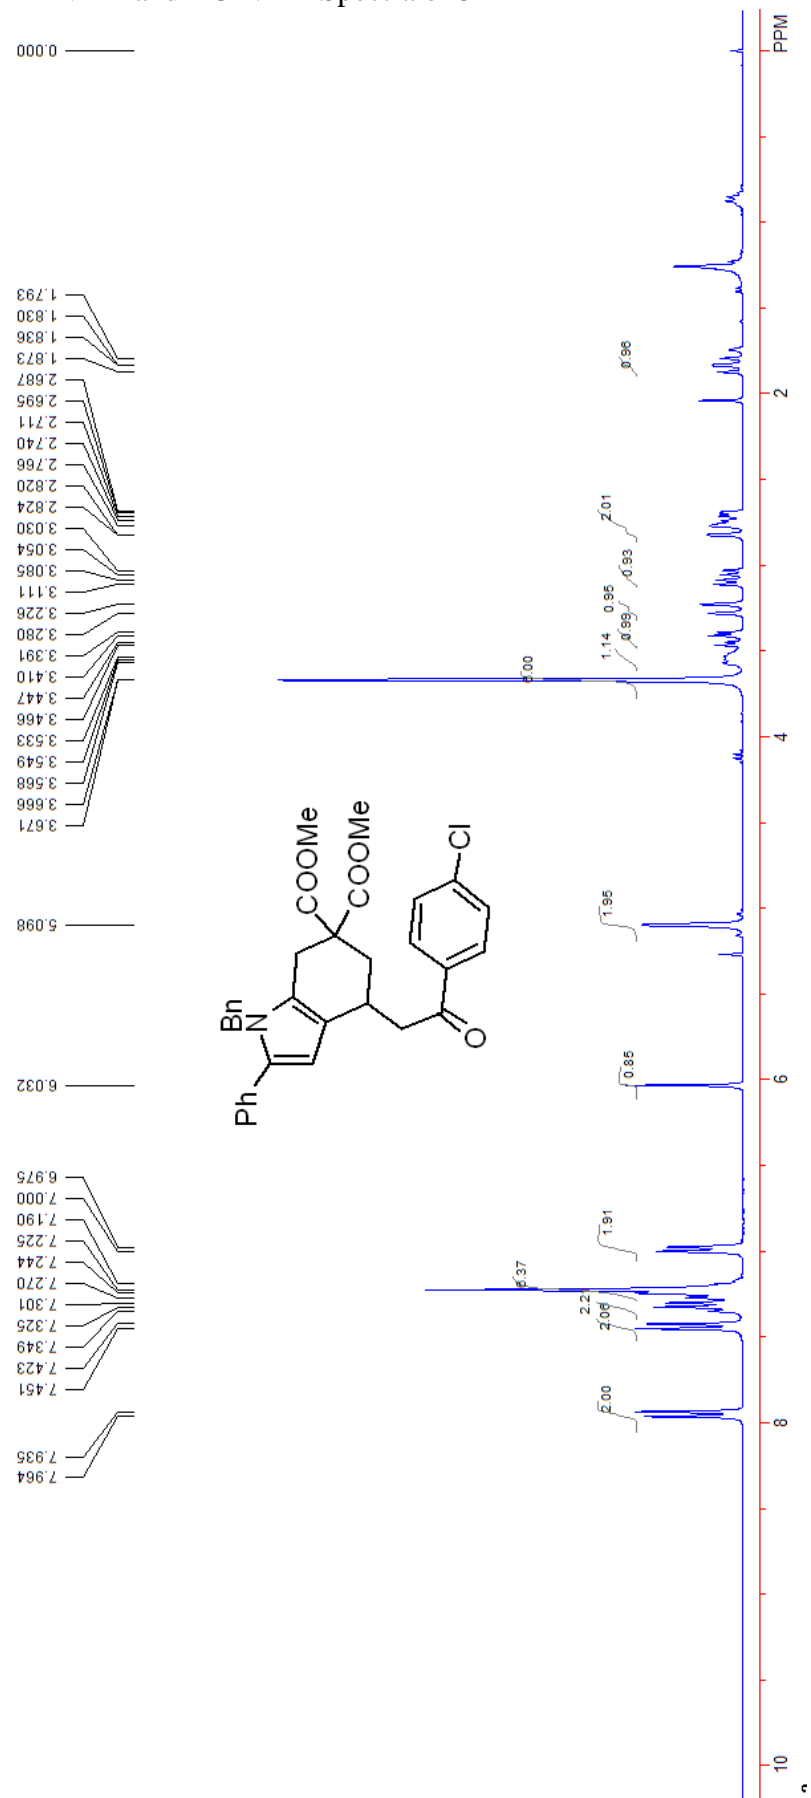

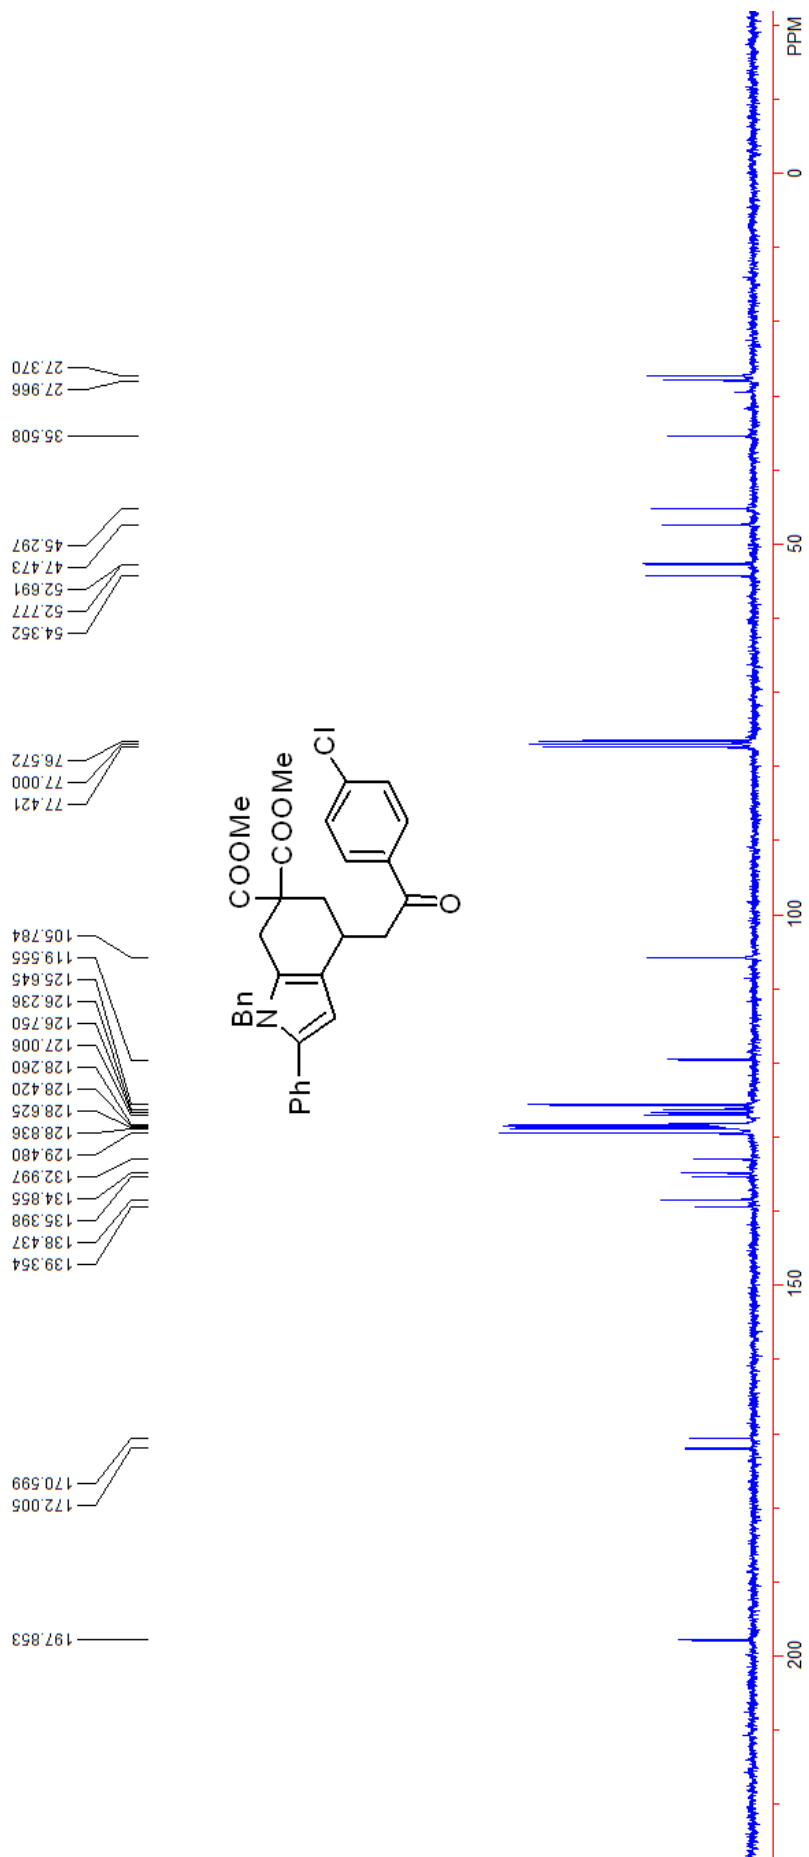



# $^1\text{H}$ NMR and $^{13}\text{C}$ NMR Spectra of **3m**

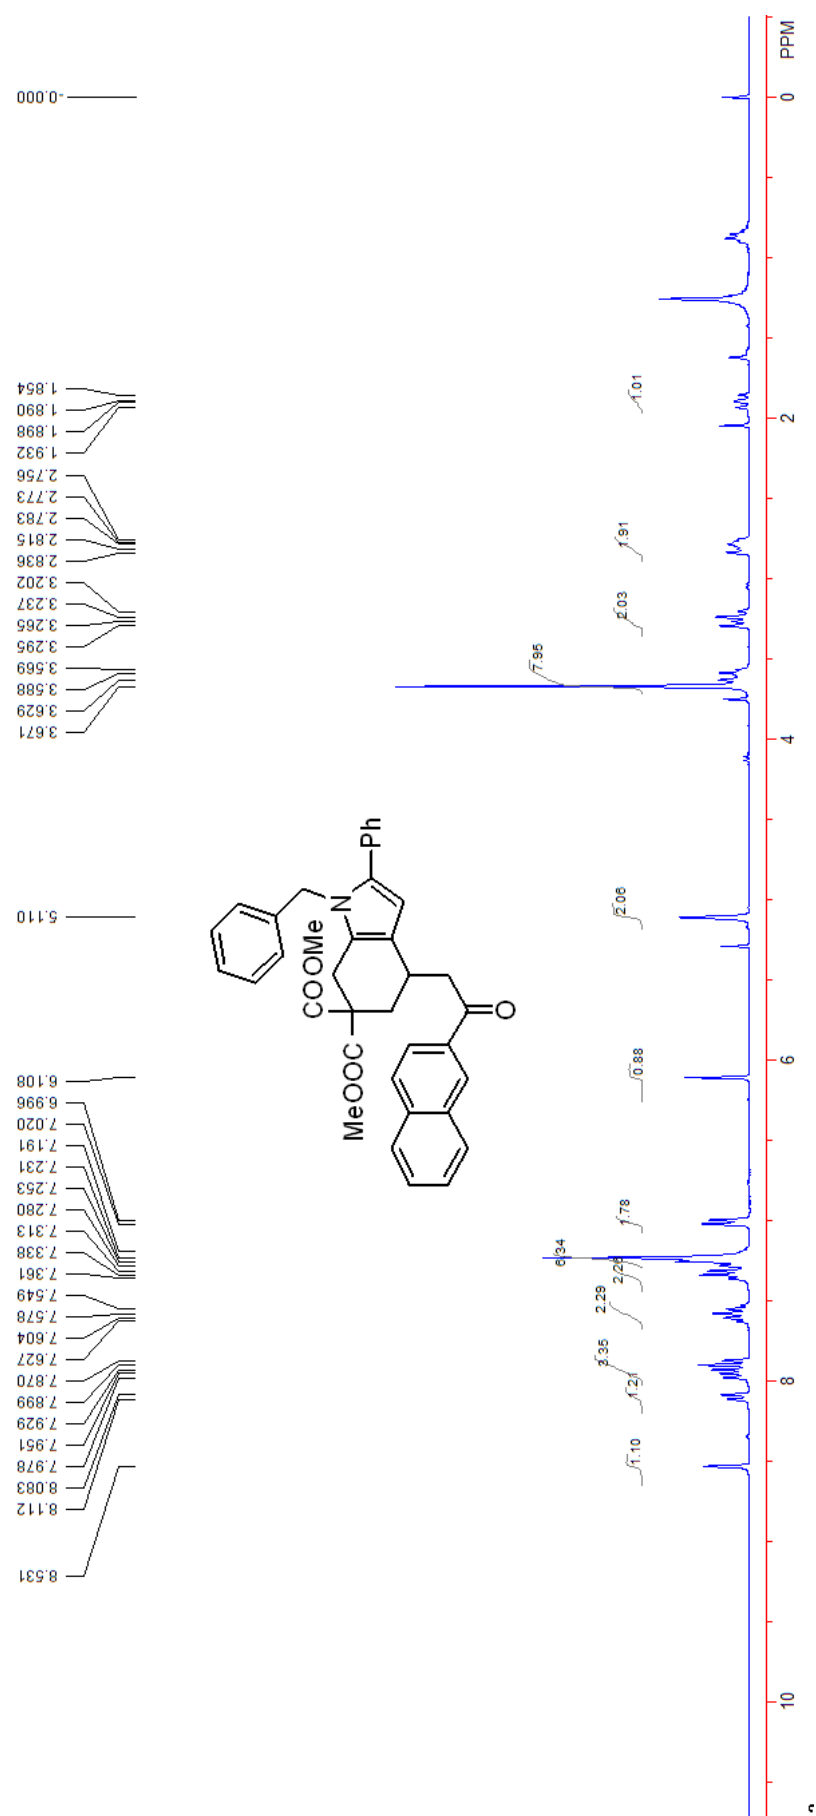

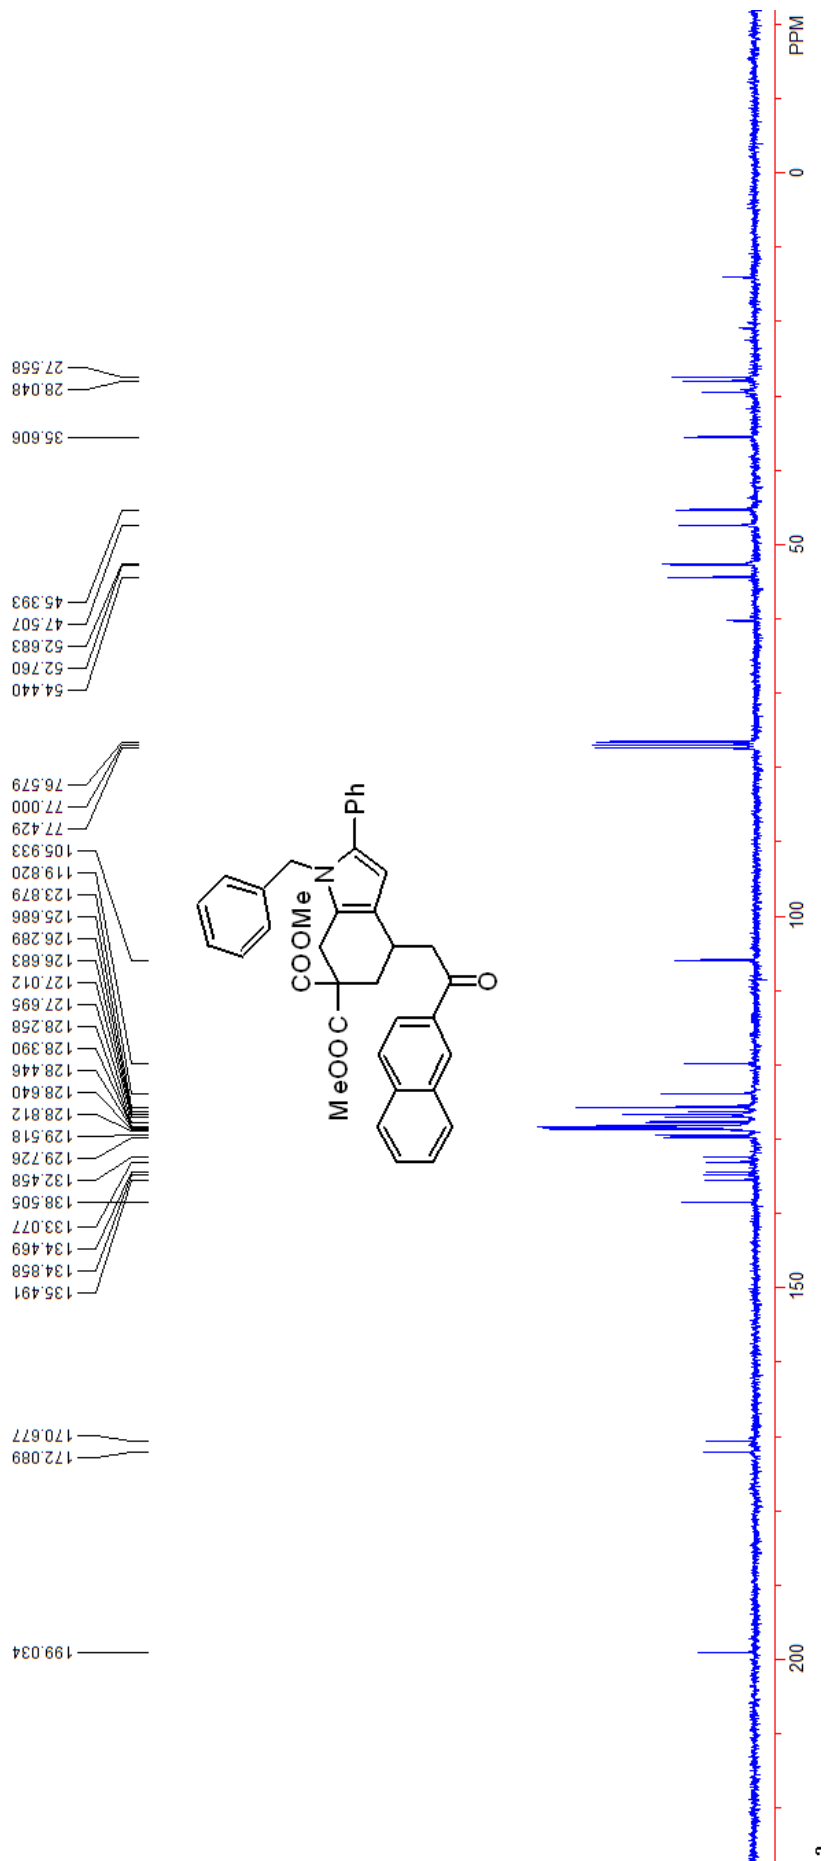

$^1\text{H}$  NMR and  $^{13}\text{C}$  NMR Spectra of **3n**

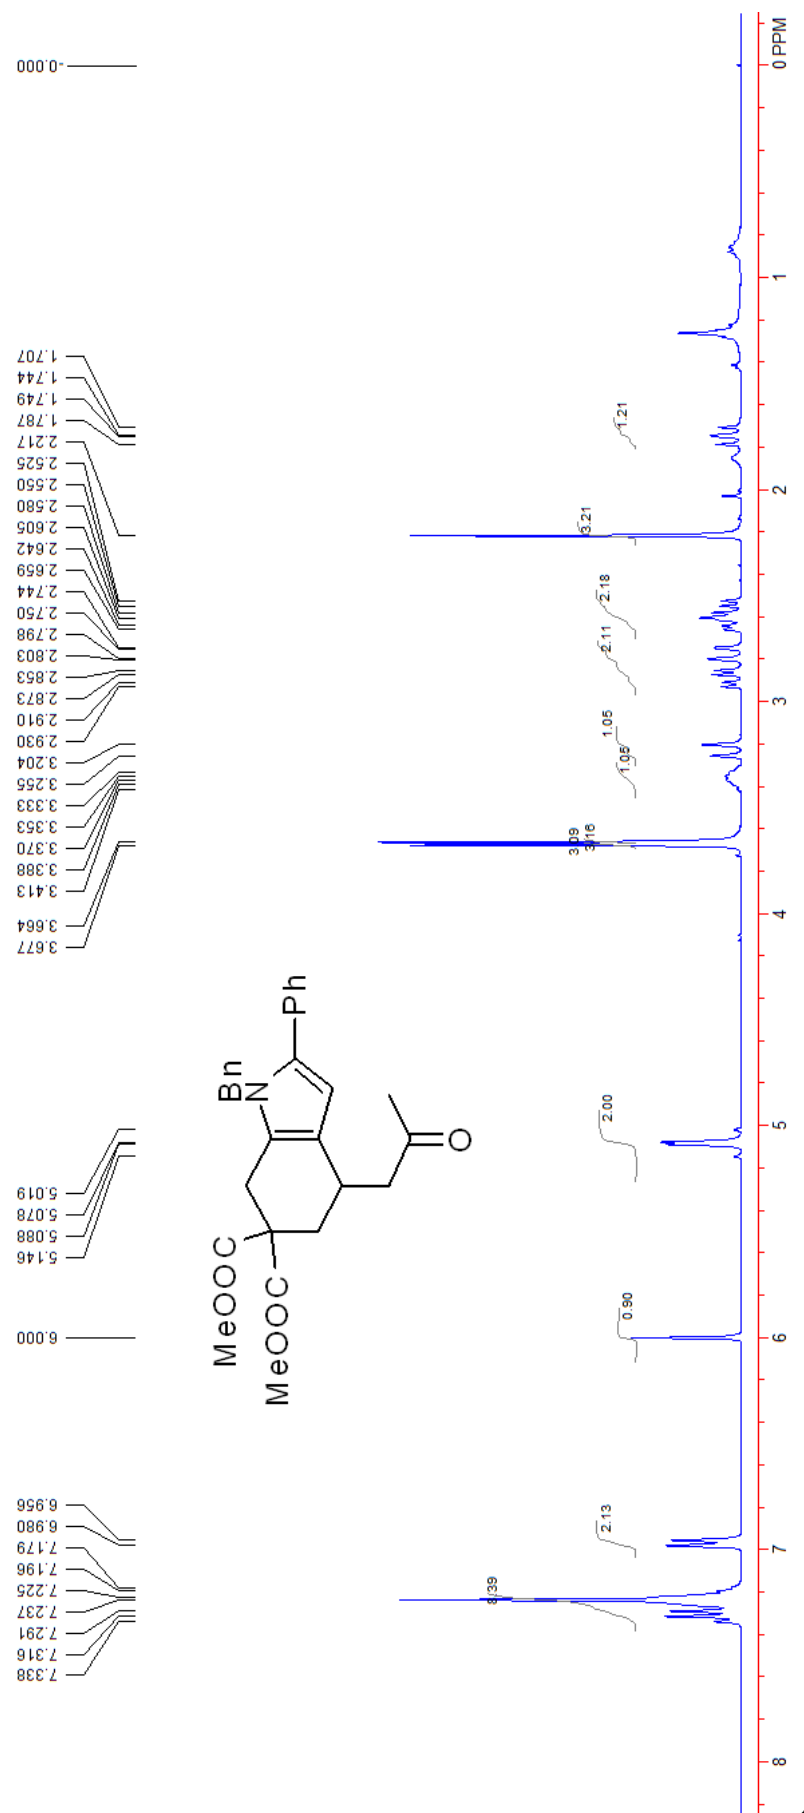

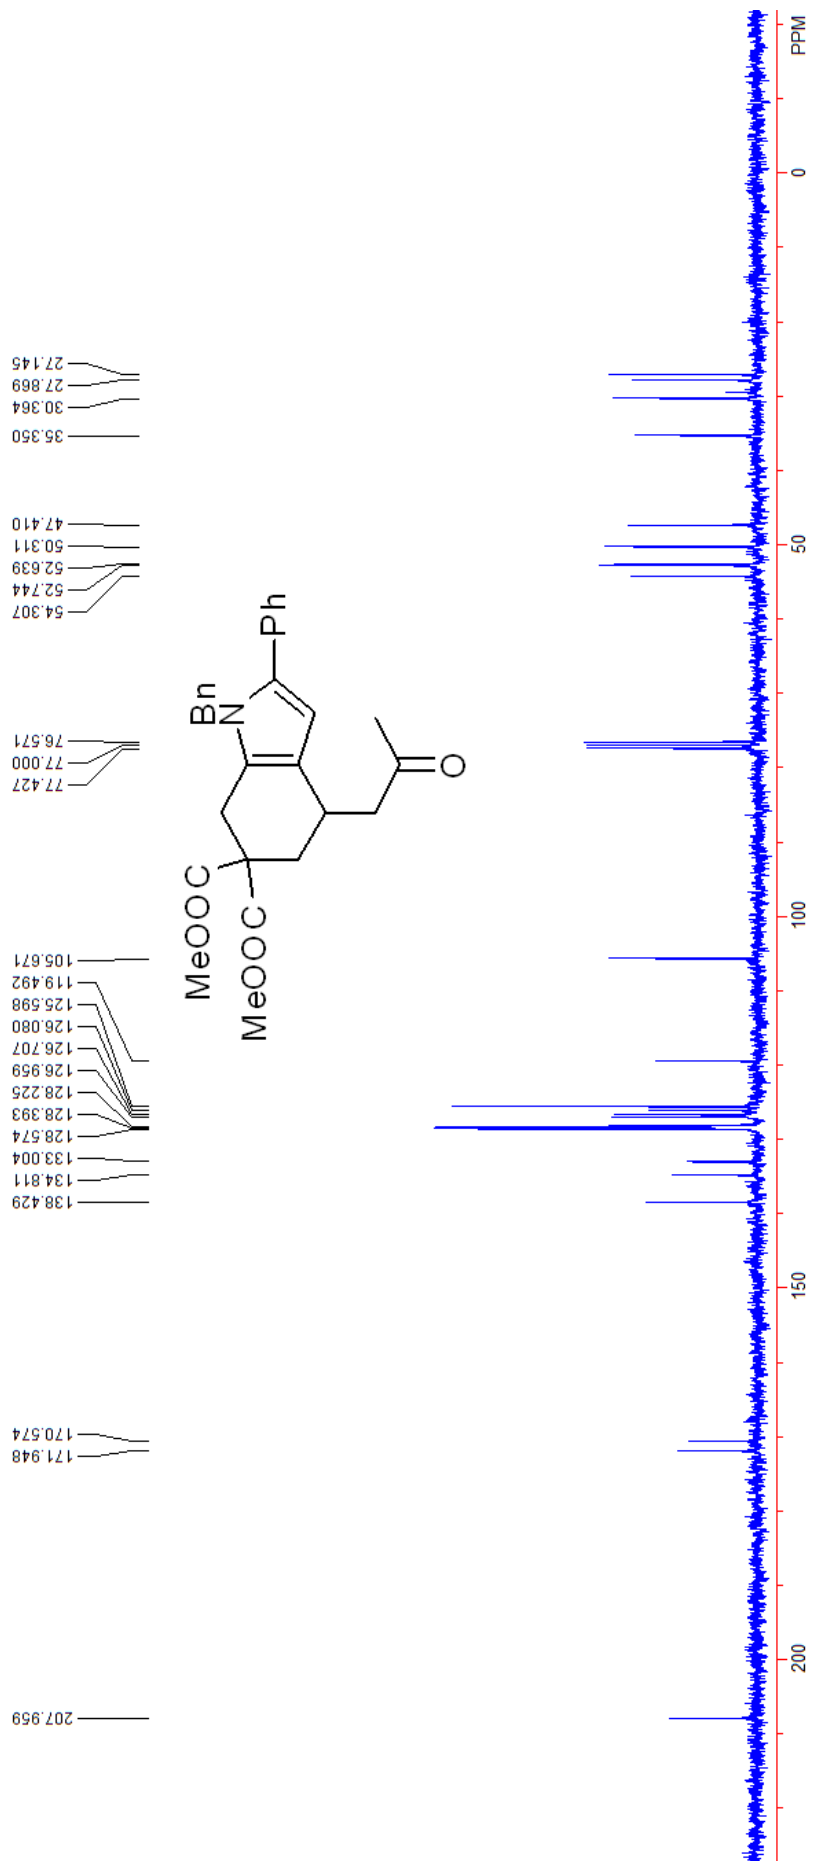

$^1\text{H}$  NMR and  $^{13}\text{C}$  NMR Spectra of **30**

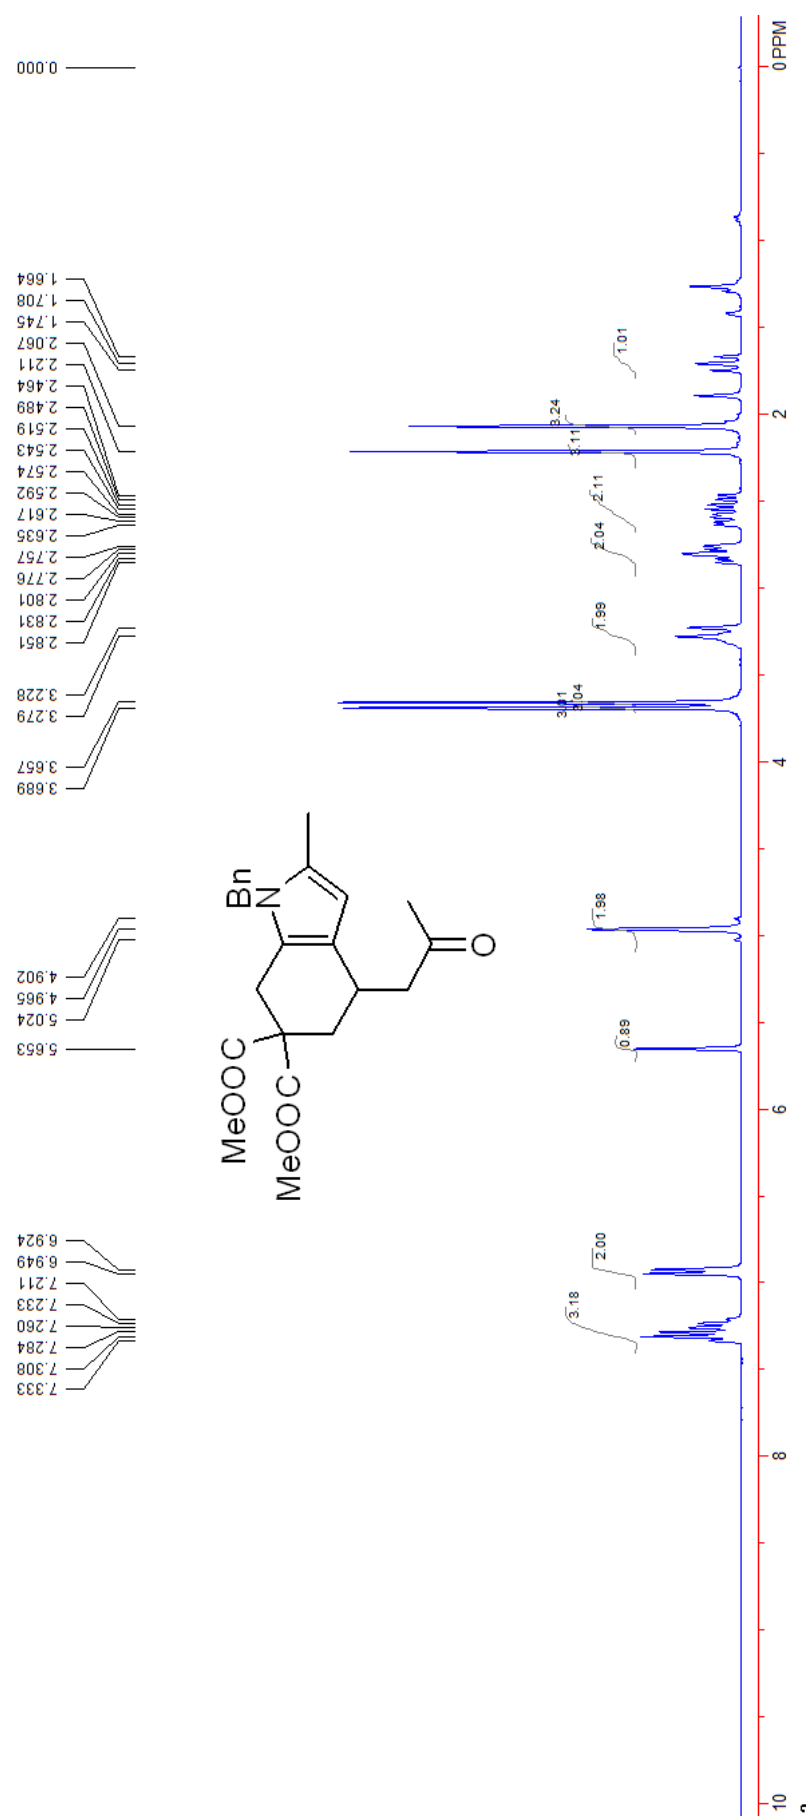

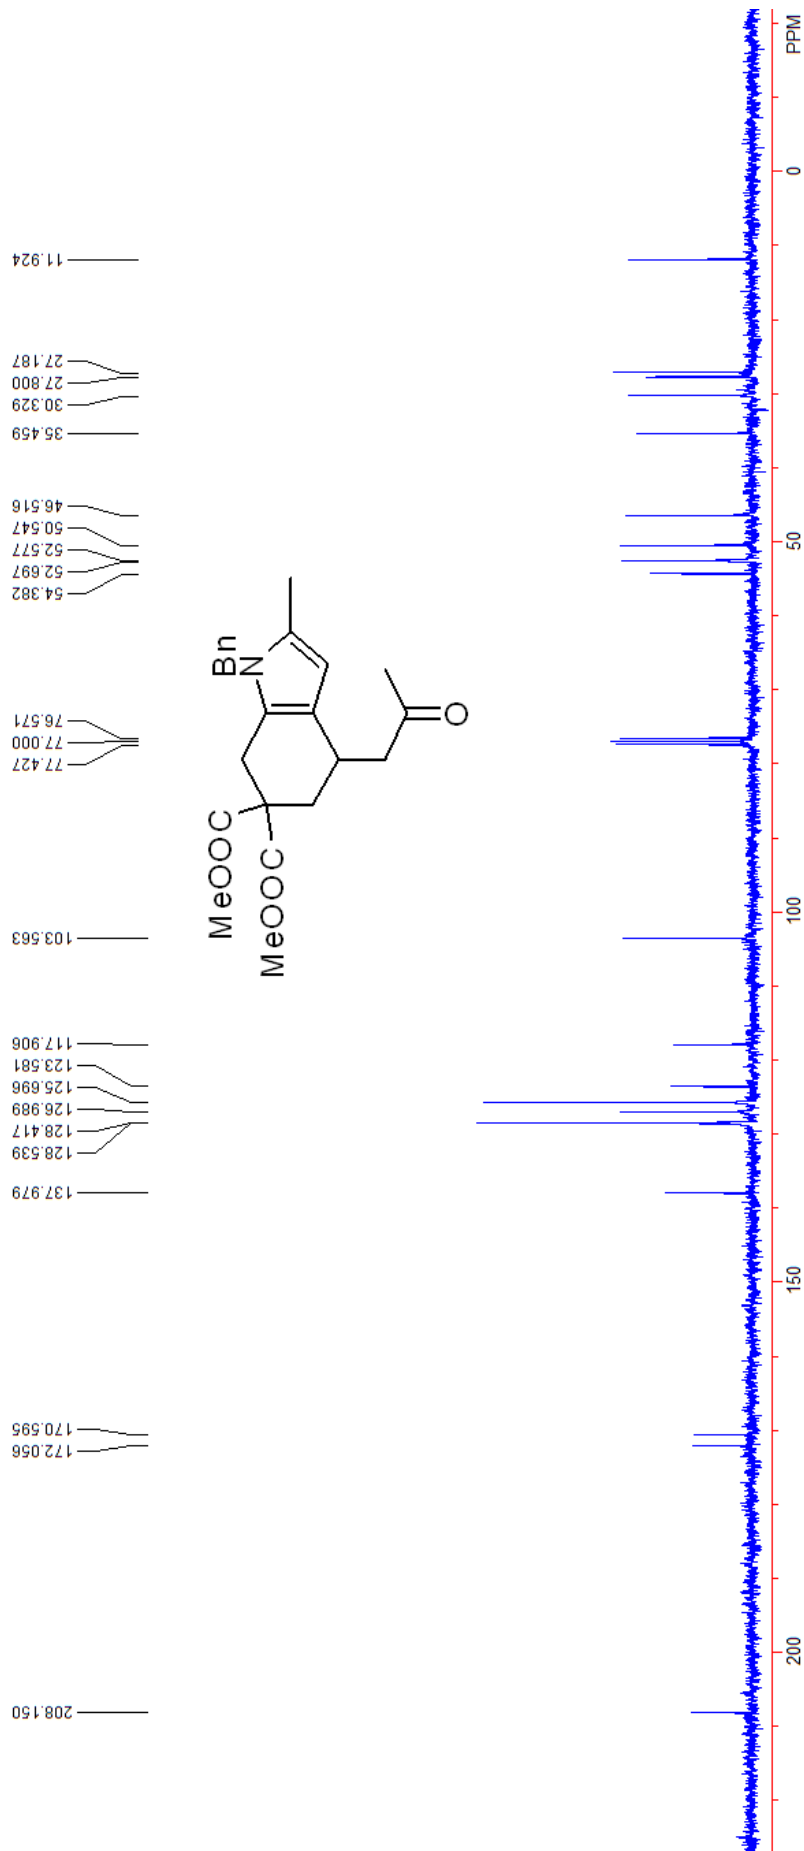

### HPLC Chromatograph of 3a

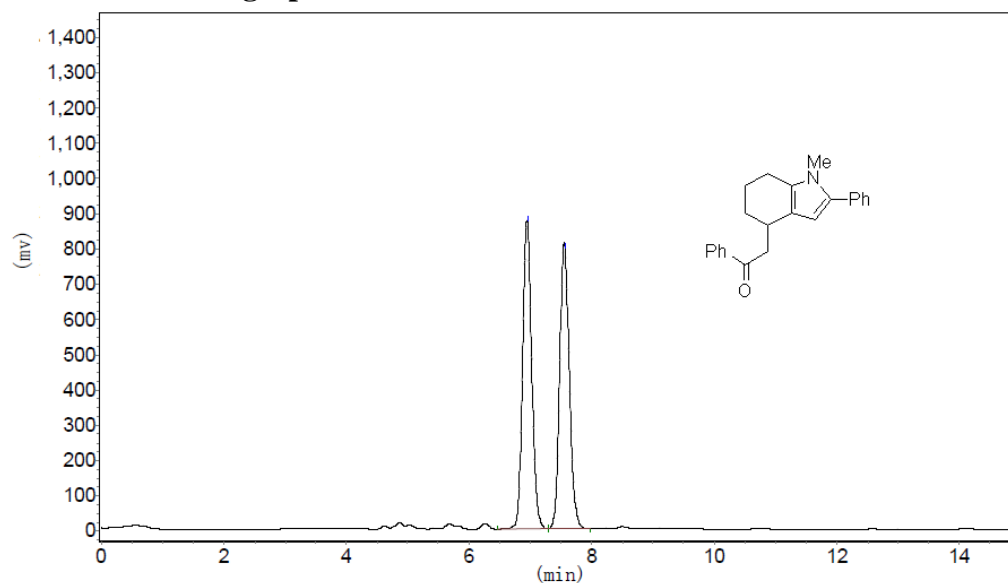

| Peak No.     | R. Time | Peak Height | Peak Area    | Percent  |
|--------------|---------|-------------|--------------|----------|
| 1            | 6.948   | 874963.000  | 9054563.000  | 50.2750  |
| 2            | 7.565   | 807482.813  | 8955519.000  | 49.7250  |
| <b>Total</b> |         | 1682445.813 | 18010082.000 | 100.0000 |

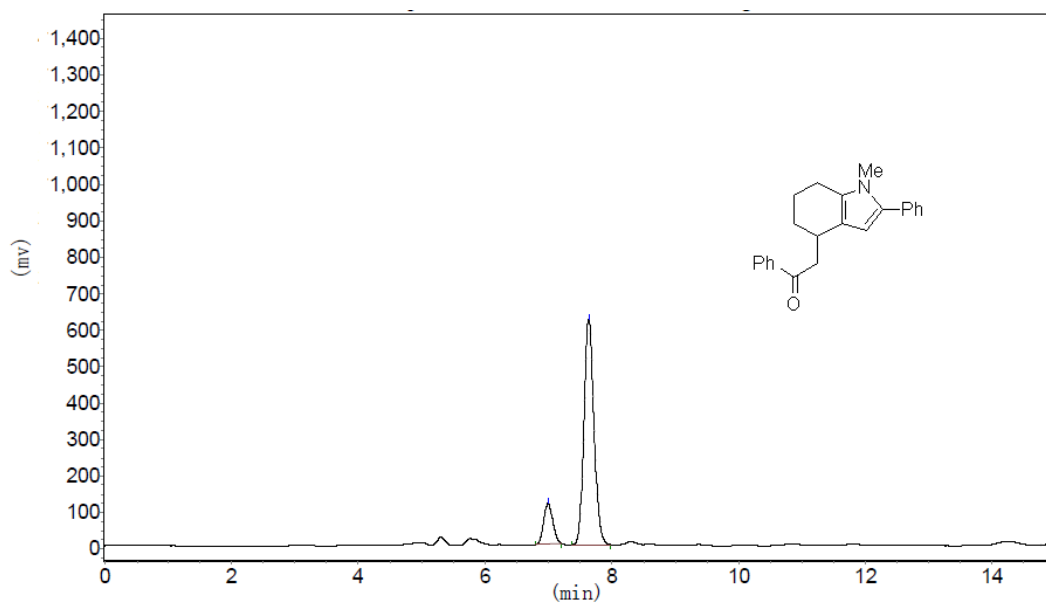

| Peak No.     | R. Time | Peak Height | Peak Area   | Percent  |
|--------------|---------|-------------|-------------|----------|
| 1            | 6.993   | 111384.266  | 1109007.500 | 13.9978  |
| 2            | 7.630   | 618690.750  | 6813725.500 | 86.0022  |
| <b>Total</b> |         | 730075.016  | 7922733.000 | 100.0000 |

## HPLC Chromatograph of 3b

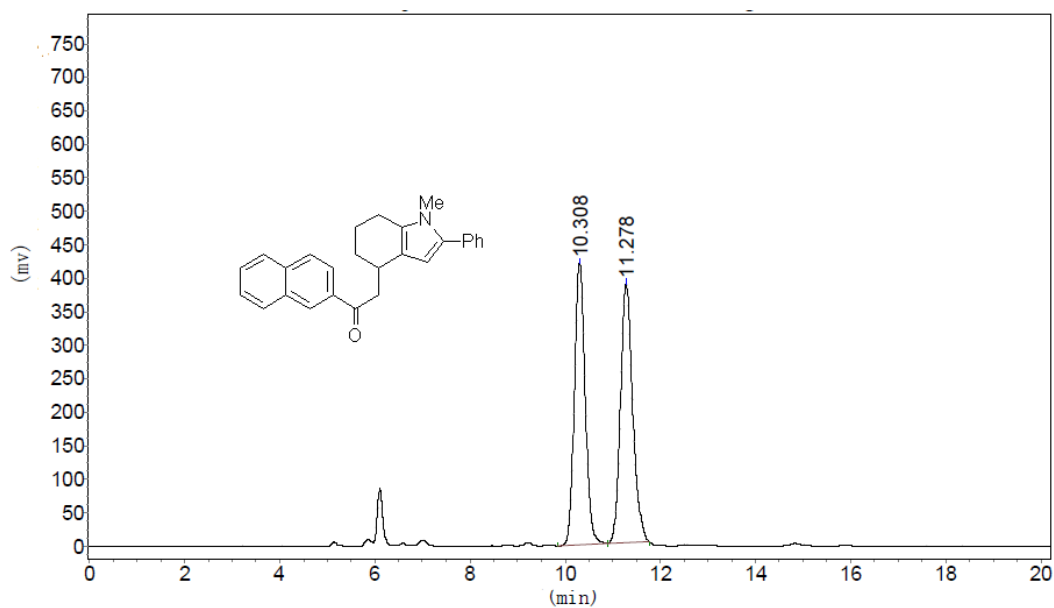

| Peak No.     | R. Time | Peak Height | Peak Area    | Percent  |
|--------------|---------|-------------|--------------|----------|
| 1            | 10.308  | 419986.875  | 6630831.000  | 49.2029  |
| 2            | 11.278  | 386581.531  | 6845678.000  | 50.7971  |
| <b>Total</b> |         | 806568.406  | 13476509.000 | 100.0000 |

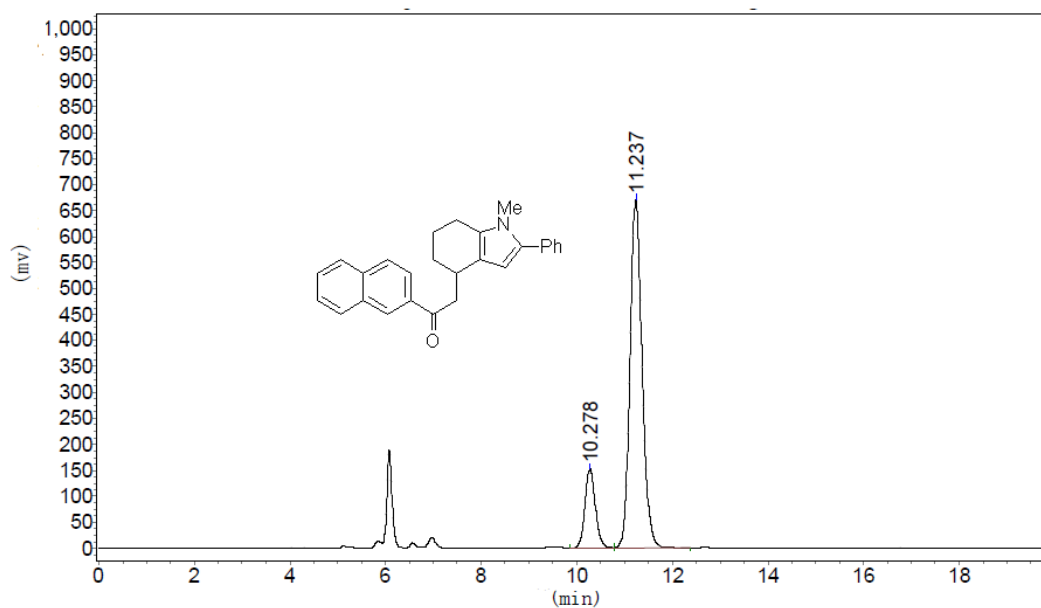

| Peak No.     | R. Time | Peak Height | Peak Area    | Percent  |
|--------------|---------|-------------|--------------|----------|
| 1            | 10.278  | 151755.094  | 2326352.000  | 16.4622  |
| 2            | 11.237  | 670158.688  | 11805160.000 | 83.5378  |
| <b>Total</b> |         | 821913.781  | 14131512.000 | 100.0000 |



### HPLC Chromatograph of 3c

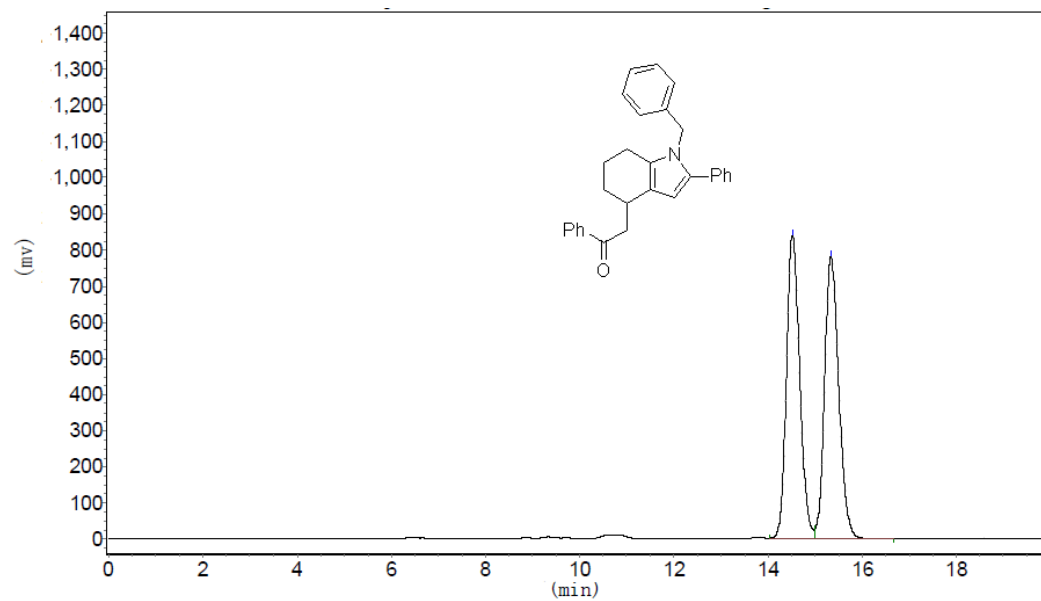

| Peak No.     | R. Time | Peak Height  | Peak Area     | Percent   |
|--------------|---------|--------------|---------------|-----------|
| 1            | 14. 515 | 841126. 813  | 16380837. 000 | 49. 8906  |
| 2            | 15. 332 | 783242. 500  | 16452659. 000 | 50. 1094  |
| <b>Total</b> |         | 1624369. 313 | 32833496. 000 | 100. 0000 |

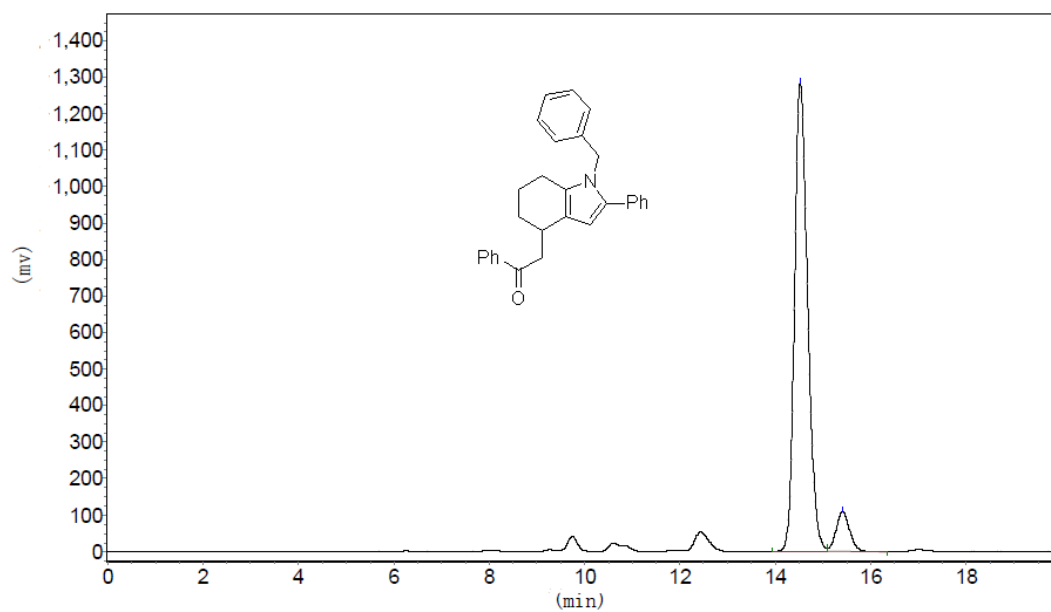

| Peak No.     | R. Time | Peak Height  | Peak Area     | Percent   |
|--------------|---------|--------------|---------------|-----------|
| 1            | 14. 517 | 1282834. 625 | 24389950. 000 | 91. 8480  |
| 2            | 15. 403 | 107808. 141  | 2164726. 750  | 8. 1520   |
| <b>Total</b> |         | 1390642. 766 | 26554676. 750 | 100. 0000 |

## HPLC Chromatograph of 3d

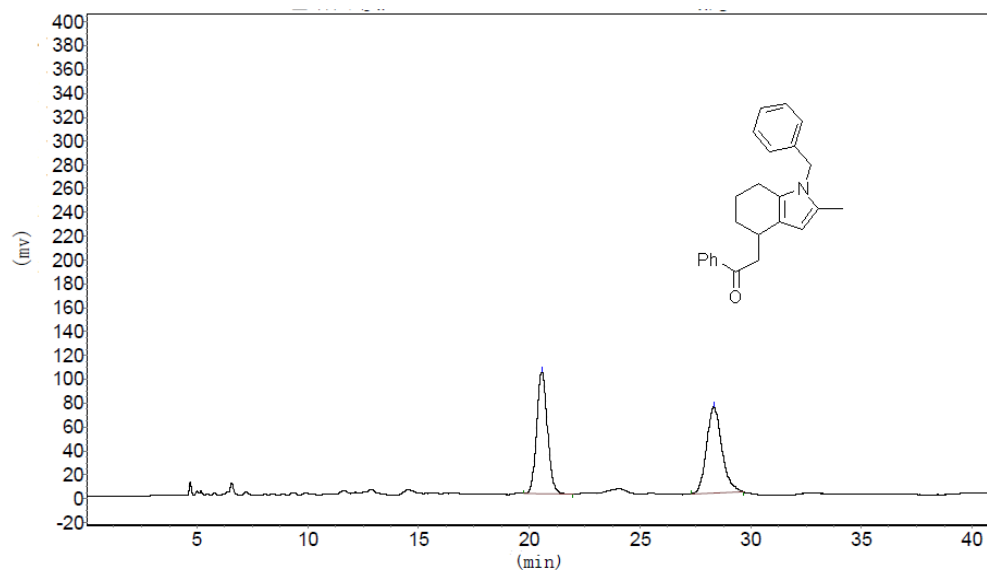

| Peak No.     | R. Time | Peak Height | Peak Area   | Percent  |
|--------------|---------|-------------|-------------|----------|
| 1            | 20.565  | 102504.070  | 3481336.750 | 49.8784  |
| 2            | 28.327  | 72086.125   | 3498306.250 | 50.1216  |
| <b>Total</b> |         | 174590.195  | 6979643.000 | 100.0000 |

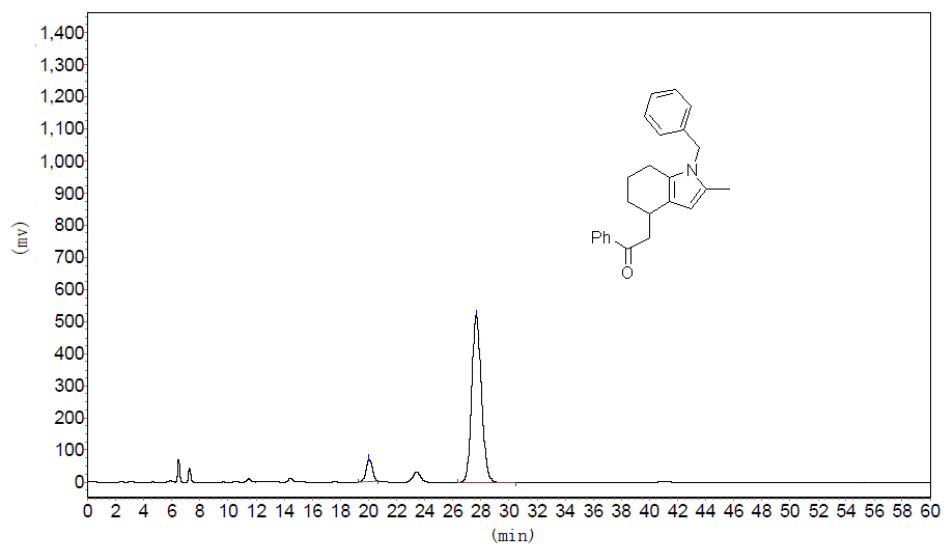

| Peak No.     | R. Time | Peak Height | Peak Area    | Percent  |
|--------------|---------|-------------|--------------|----------|
| 1            | 20.058  | 68956.156   | 2213508.250  | 8.1304   |
| 2            | 27.662  | 522879.969  | 25011430.000 | 91.8696  |
| <b>Total</b> |         | 591836.125  | 27224938.250 | 100.0000 |

## HPLC Chromatograph of 3e

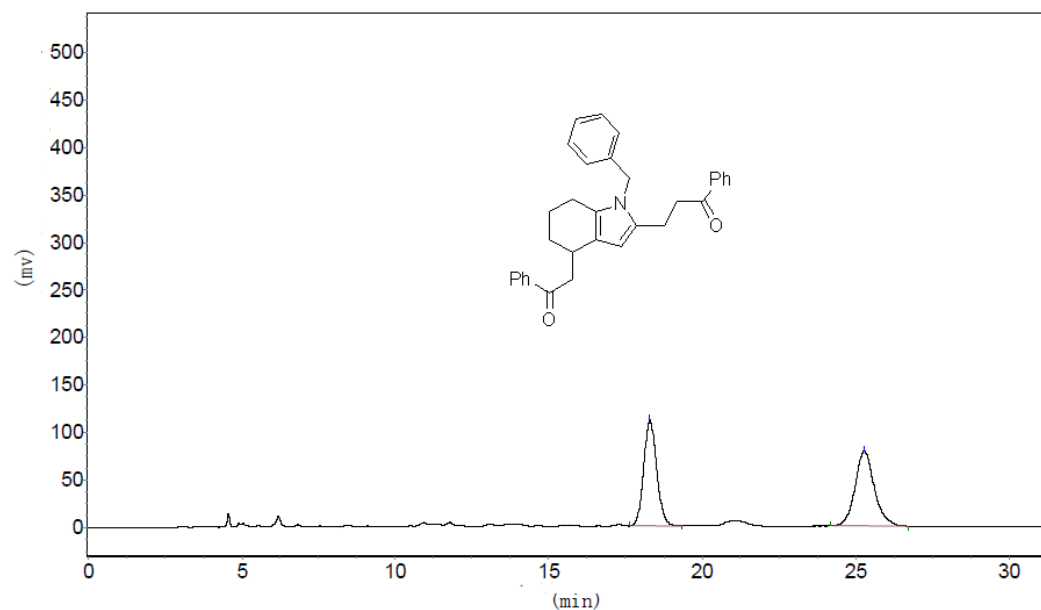

| Peak No.     | R. Time | Peak Height | Peak Area   | Percent  |
|--------------|---------|-------------|-------------|----------|
| 1            | 18.293  | 111326.563  | 3328729.750 | 49.2491  |
| 2            | 25.287  | 78488.508   | 3430229.250 | 50.7509  |
| <b>Total</b> |         | 189815.070  | 6758959.000 | 100.0000 |

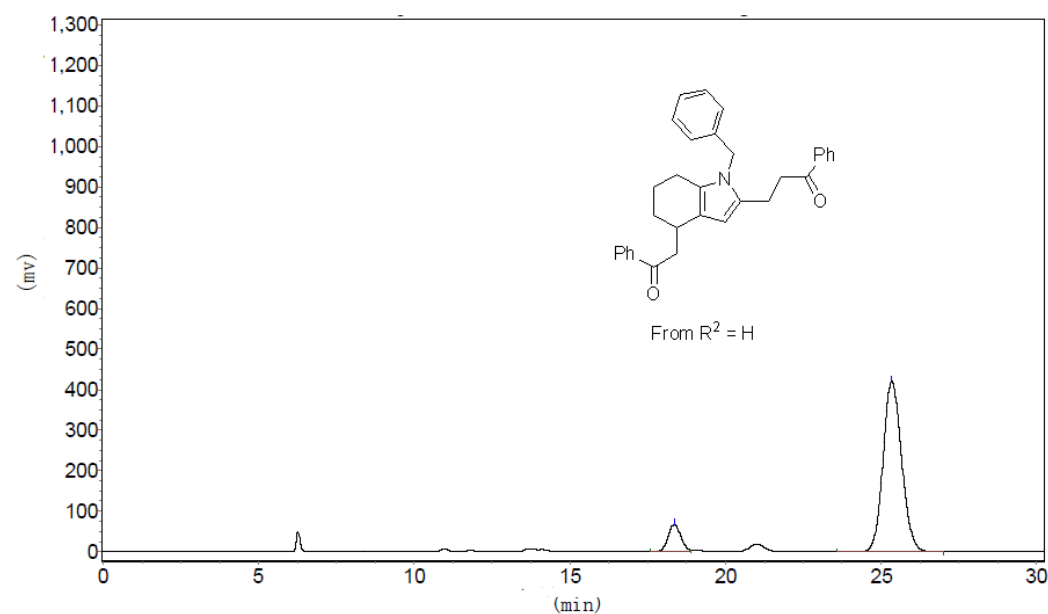

| Peak No.     | R. Time | Peak Height | Peak Area    | Percent  |
|--------------|---------|-------------|--------------|----------|
| 1            | 18.362  | 67416.938   | 1956712.375  | 10.0189  |
| 2            | 25.340  | 422568.156  | 17573402.000 | 89.9810  |
| <b>Total</b> |         | 489985.094  | 19530114.375 | 100.0000 |

## HPLC Chromatograph of 3f

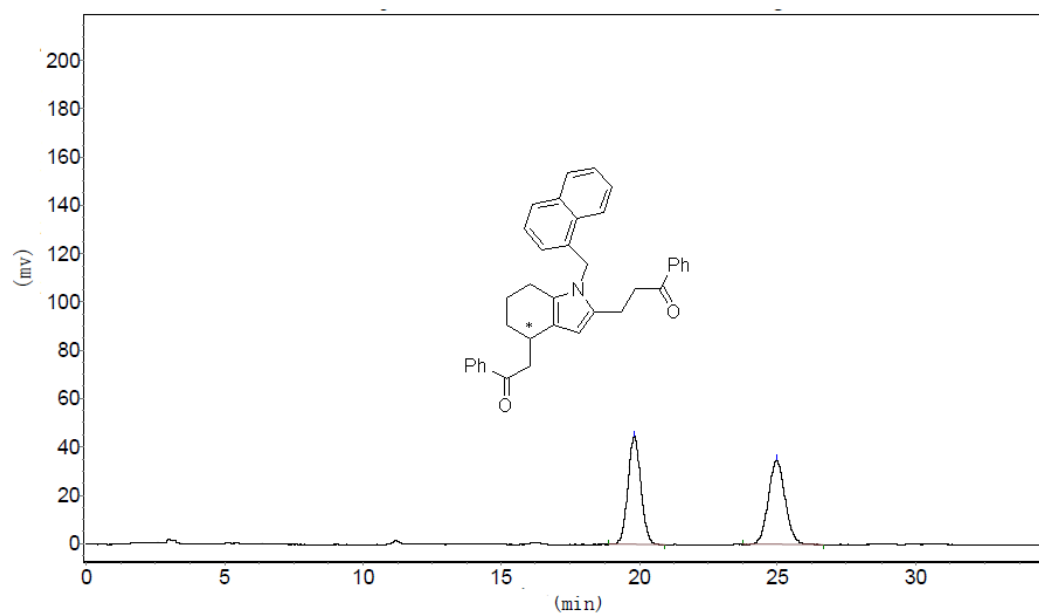

| Peak No.     | R. Time | Peak Height | Peak Area   | Percent  |
|--------------|---------|-------------|-------------|----------|
| 1            | 19.818  | 44671.621   | 1460307.875 | 49.8882  |
| 2            | 24.965  | 35003.121   | 1466855.000 | 50.1118  |
| <b>Total</b> |         | 79674.742   | 2927162.875 | 100.0000 |

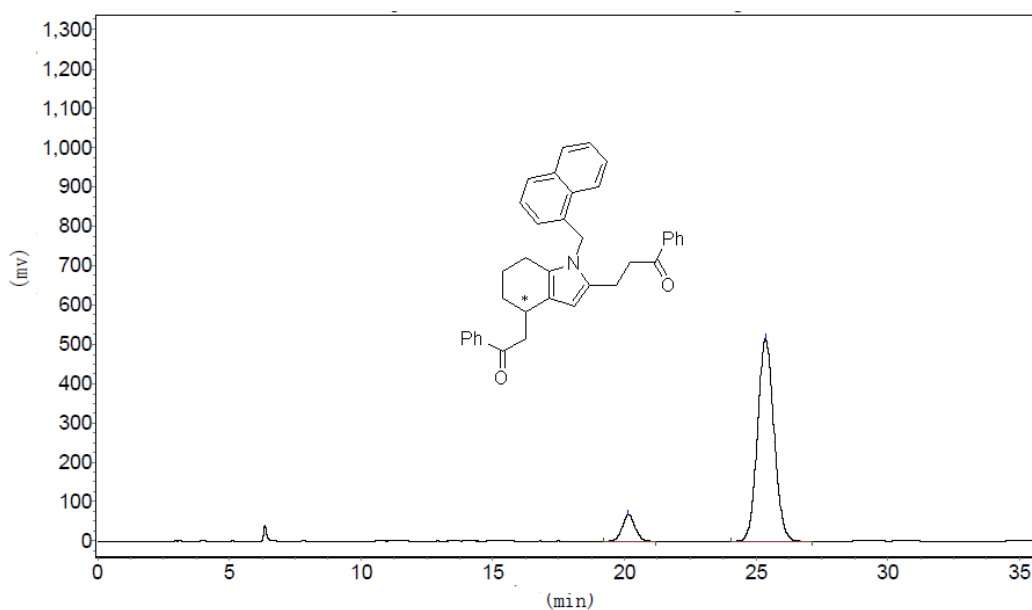

| Peak No.     | R. Time | Peak Height | Peak Area    | Percent  |
|--------------|---------|-------------|--------------|----------|
| 1            | 20.158  | 66185.547   | 2258200.500  | 9.2074   |
| 2            | 25.358  | 515310.750  | 22267806.000 | 90.7926  |
| <b>Total</b> |         | 581496.297  | 24526006.500 | 100.0000 |

### HPLC Chromatograph of 3g

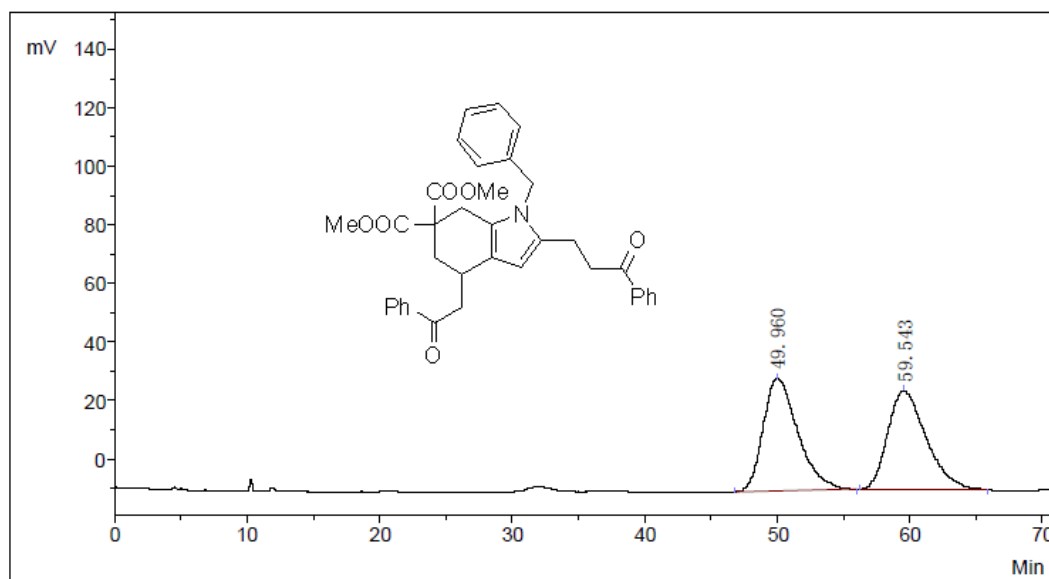

| No.   | PeakNo | ID. Name | R. Time | PeakHeight | PeakArea   | PerCent  |
|-------|--------|----------|---------|------------|------------|----------|
| 1     | 1      | Unknown  | 49.960  | 38385.5    | 6991874.9  | 50.6854  |
| 2     | 2      | Unknown  | 59.543  | 33587.5    | 6802773.0  | 49.3146  |
| Total |        |          |         | 71973.1    | 13794647.9 | 100.0000 |

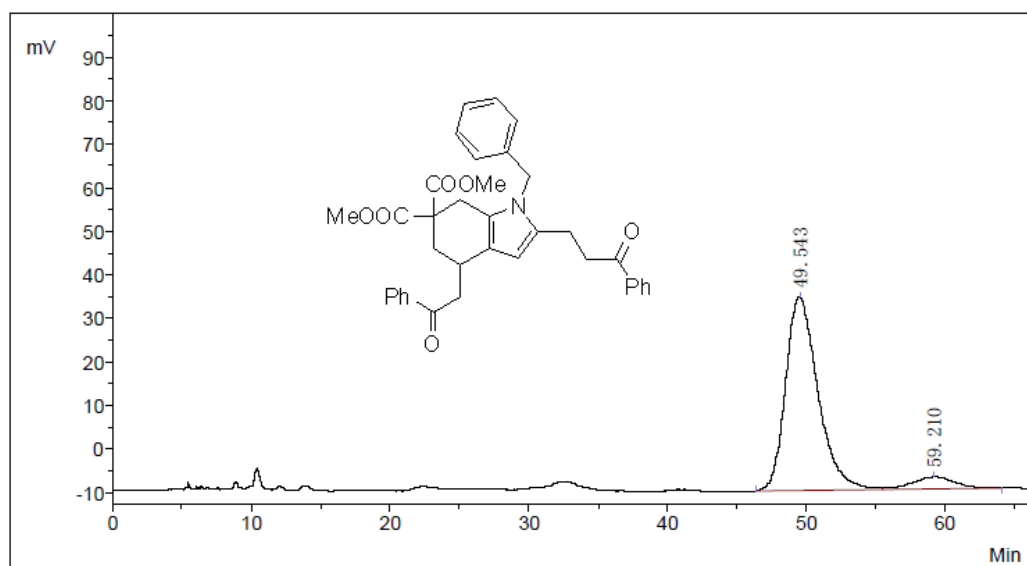

| No.   | PeakNo | ID. Name | R. Time | PeakHeight | PeakArea  | PerCent  |
|-------|--------|----------|---------|------------|-----------|----------|
| 1     | 1      | Unknown  | 49.543  | 44528.0    | 7172282.6 | 92.6021  |
| 2     | 2      | Unknown  | 59.210  | 2797.3     | 572986.1  | 7.3979   |
| Total |        |          |         | 47325.3    | 7745268.7 | 100.0000 |

### HPLC Chromatograph of 3h

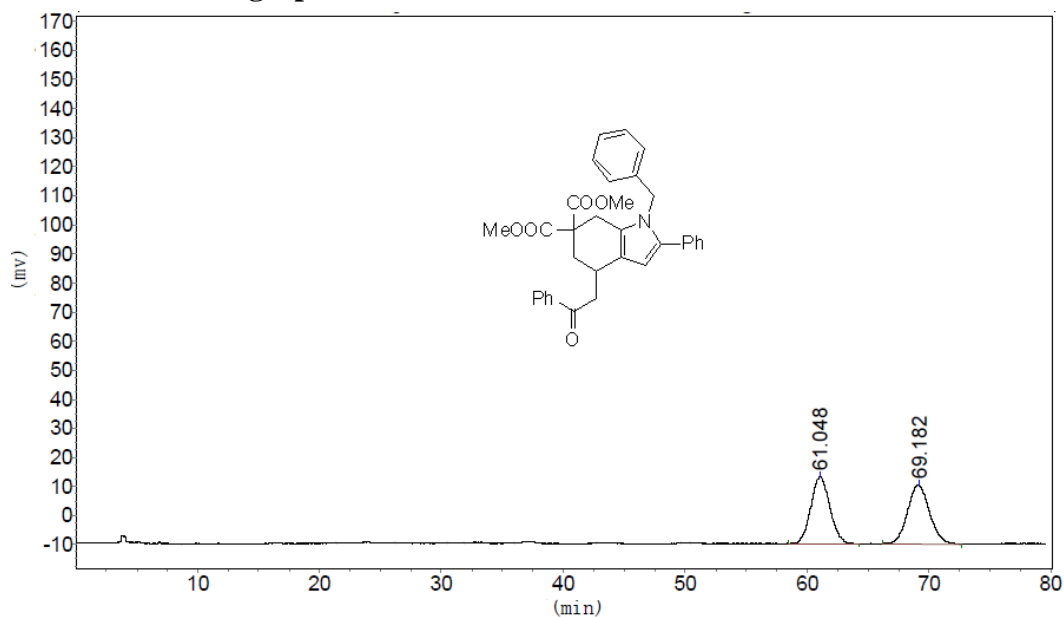

| Peak No.     | R. Time | Peak Height | Peak Area   | Percent  |
|--------------|---------|-------------|-------------|----------|
| 1            | 61.048  | 23056.500   | 2530019.250 | 49.7122  |
| 2            | 69.182  | 20290.648   | 2559312.250 | 50.2878  |
| <b>Total</b> |         | 43347.148   | 5089331.500 | 100.0000 |

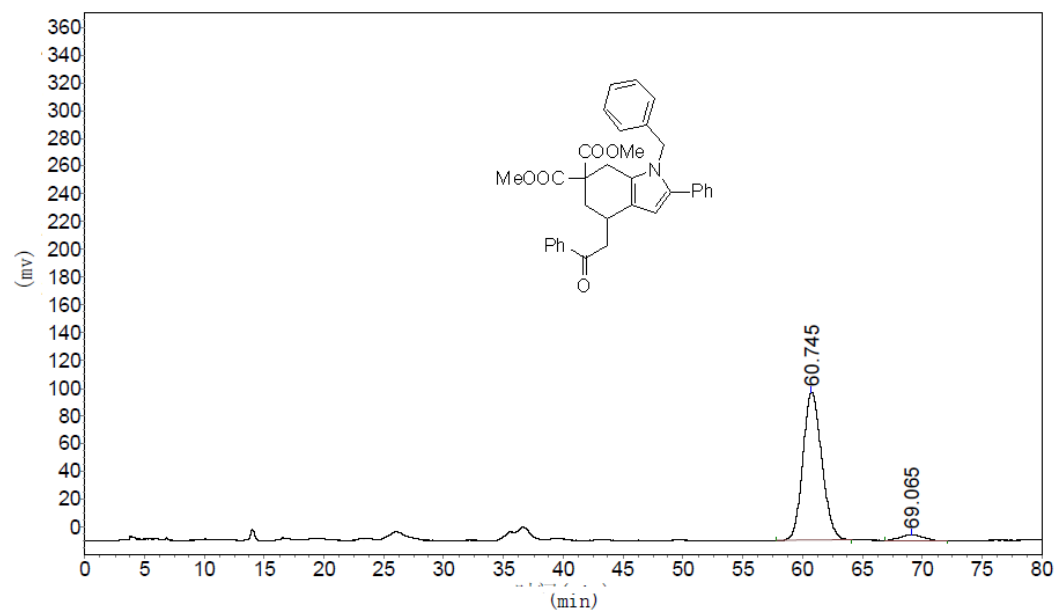

| Peak No.     | R. Time | Peak Height | Peak Area    | Percent  |
|--------------|---------|-------------|--------------|----------|
| 1            | 60.745  | 106340.891  | 11745743.000 | 95.8073  |
| 2            | 69.065  | 4203.947    | 514020.625   | 4.1927   |
| <b>Total</b> |         | 110544.838  | 12259763.625 | 100.0000 |

## HPLC Chromatograph of 3i

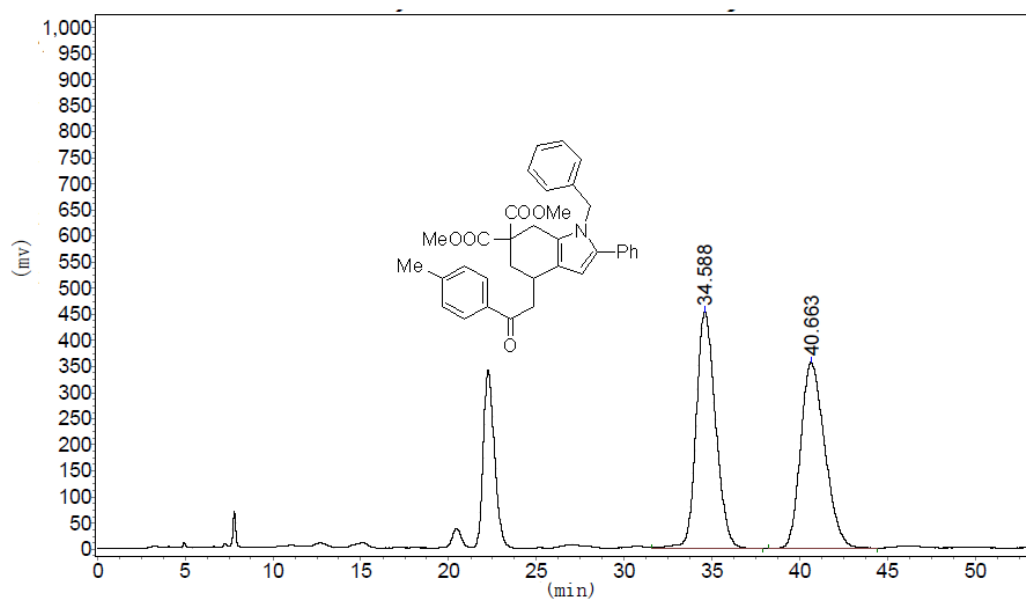

| Peak No.     | R. Time | Peak Height | Peak Area    | Percent  |
|--------------|---------|-------------|--------------|----------|
| 1            | 34.588  | 453643.031  | 34809344.000 | 50.3315  |
| 2            | 40.663  | 356532.719  | 34350784.000 | 49.6685  |
| <b>Total</b> |         | 810175.750  | 69160128.000 | 100.0000 |

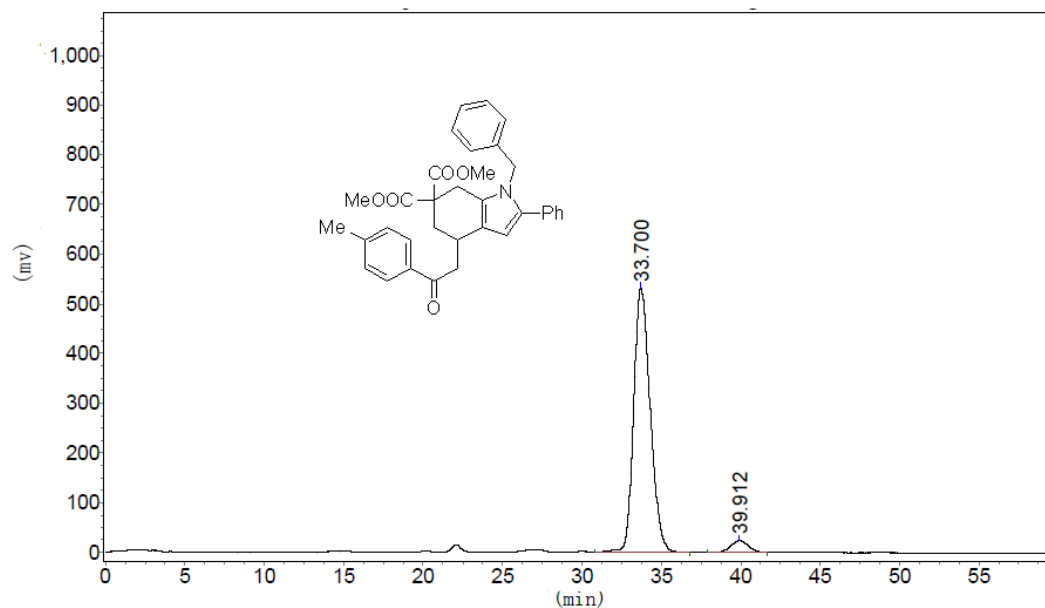

| Peak No.     | R. Time | Peak Height | Peak Area    | Percent  |
|--------------|---------|-------------|--------------|----------|
| 1            | 33.700  | 531798.500  | 38787344.000 | 95.2259  |
| 2            | 39.912  | 24402.662   | 1944589.000  | 4.7741   |
| <b>Total</b> |         | 556201.162  | 40731933.000 | 100.0000 |

### HPLC Chromatograph of 3j

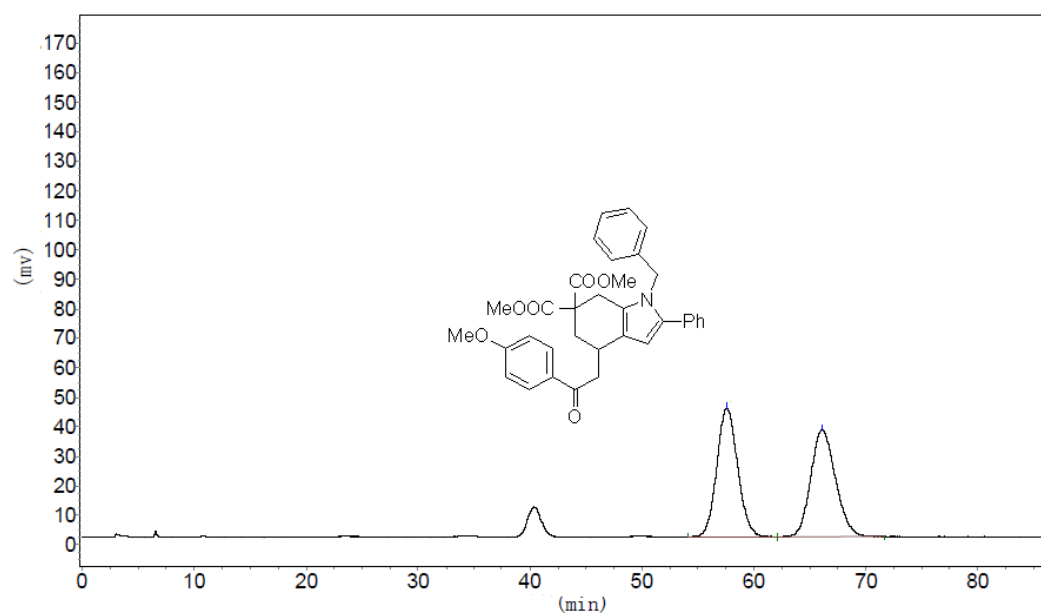

| Peak No.     | R. Time | Peak Height | Peak Area    | Percent  |
|--------------|---------|-------------|--------------|----------|
| 1            | 57.580  | 43708.070   | 5695279.500  | 50.2071  |
| 2            | 66.132  | 36177.227   | 5648286.500  | 49.7929  |
| <b>Total</b> |         | 79885.297   | 11343566.000 | 100.0000 |

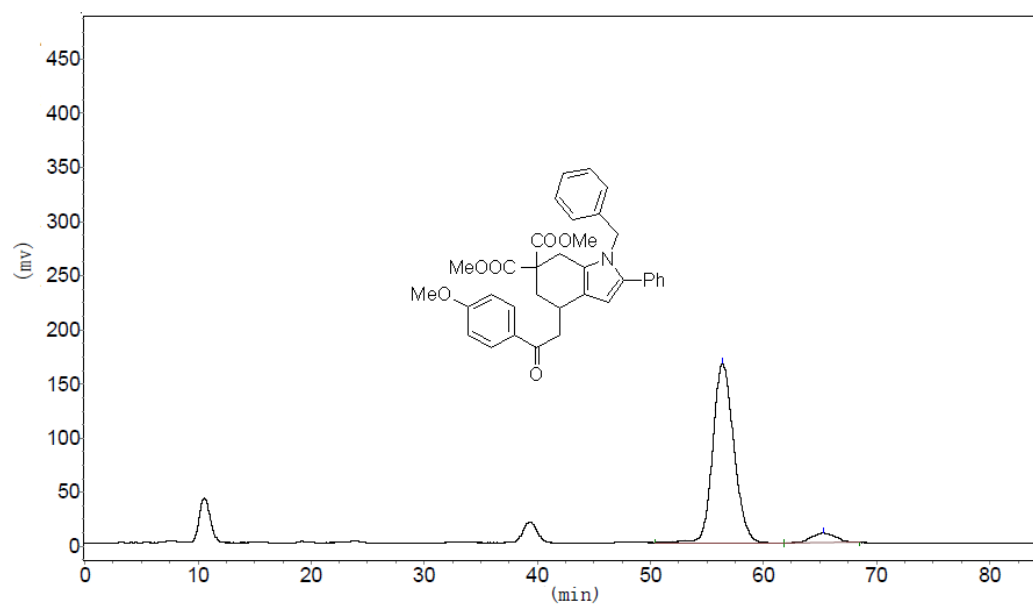

| Peak No.     | R. Time | Peak Height | Peak Area    | Percent  |
|--------------|---------|-------------|--------------|----------|
| 1            | 56.372  | 166133.656  | 21694434.000 | 94.1665  |
| 2            | 65.275  | 9015.061    | 1343944.625  | 5.8335   |
| <b>Total</b> |         | 175148.717  | 23038378.625 | 100.0000 |



## HPLC Chromatograph of 3k

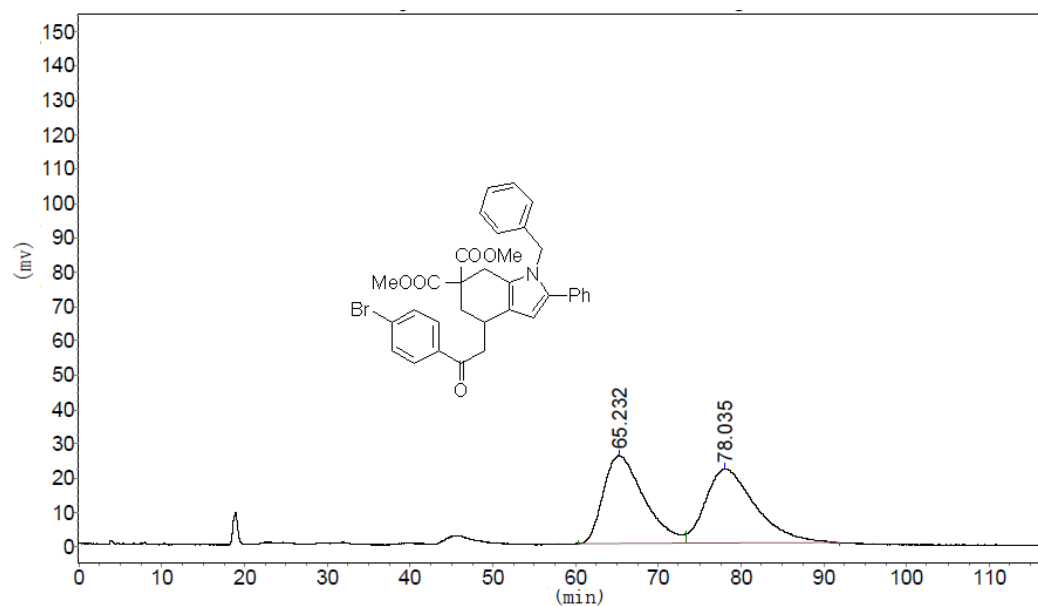

| Peak No.     | R. Time | Peak Height | Peak Area    | Percent  |
|--------------|---------|-------------|--------------|----------|
| 1            | 65.232  | 25568.416   | 8740805.000  | 49.3063  |
| 2            | 78.035  | 21537.629   | 8986759.000  | 50.6937  |
| <b>Total</b> |         | 47106.045   | 17727564.000 | 100.0000 |

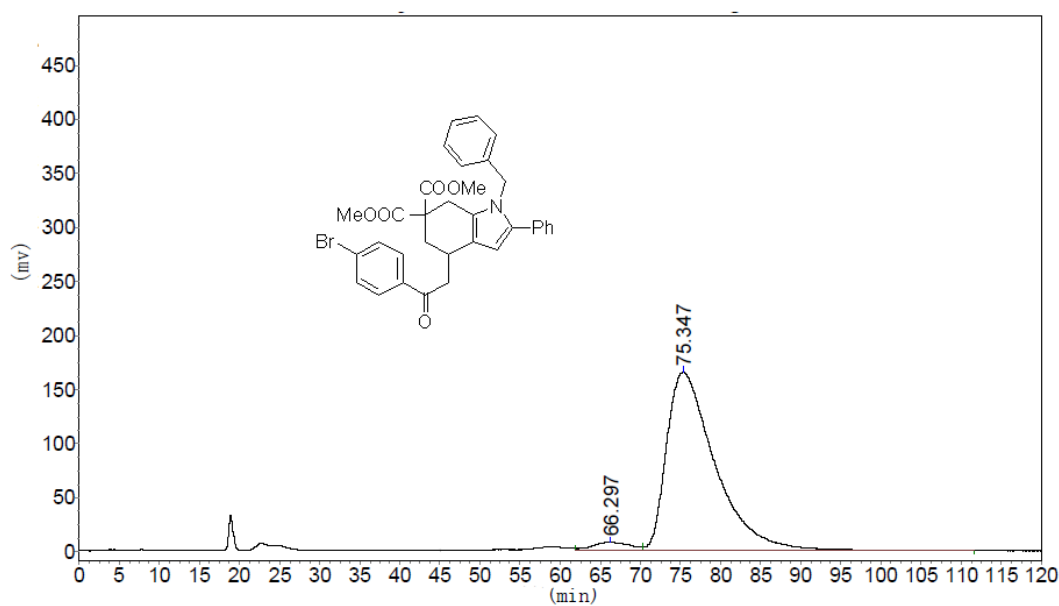

| Peak No.     | R. Time | Peak Height | Peak Area    | Percent  |
|--------------|---------|-------------|--------------|----------|
| 1            | 66.297  | 7622.033    | 2506388.250  | 3.4773   |
| 2            | 75.347  | 164784.438  | 69572360.000 | 96.5227  |
| <b>Total</b> |         | 172406.470  | 72078748.250 | 100.0000 |

## HPLC Chromatograph of 3l

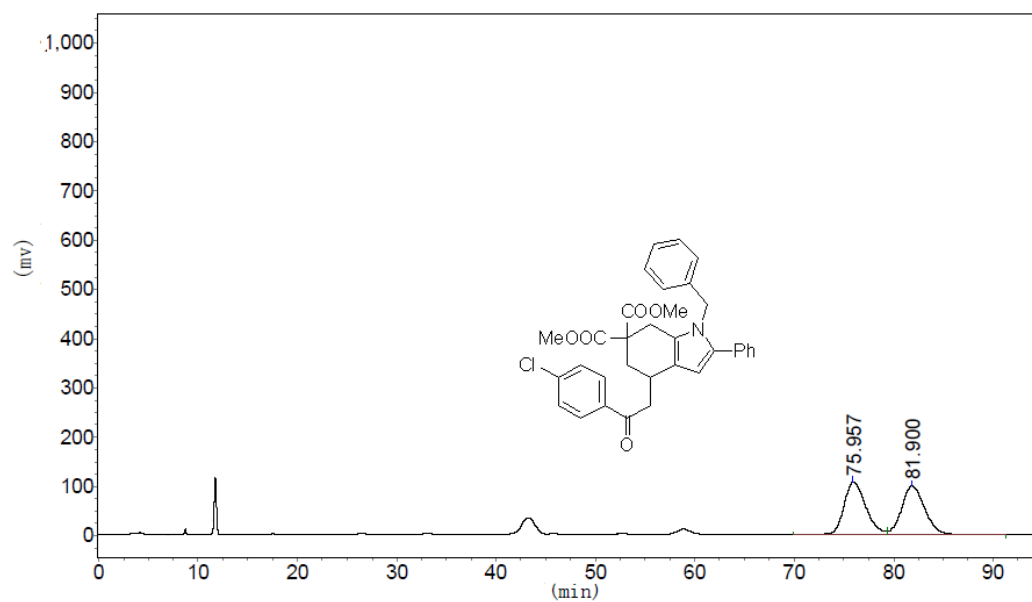

| Peak No.     | R. Time | Peak Height | Peak Area    | Percent  |
|--------------|---------|-------------|--------------|----------|
| 1            | 75.957  | 107664.406  | 16382757.000 | 50.3222  |
| 2            | 81.900  | 98957.242   | 16172999.000 | 49.6778  |
| <b>Total</b> |         | 206621.648  | 32555756.000 | 100.0000 |

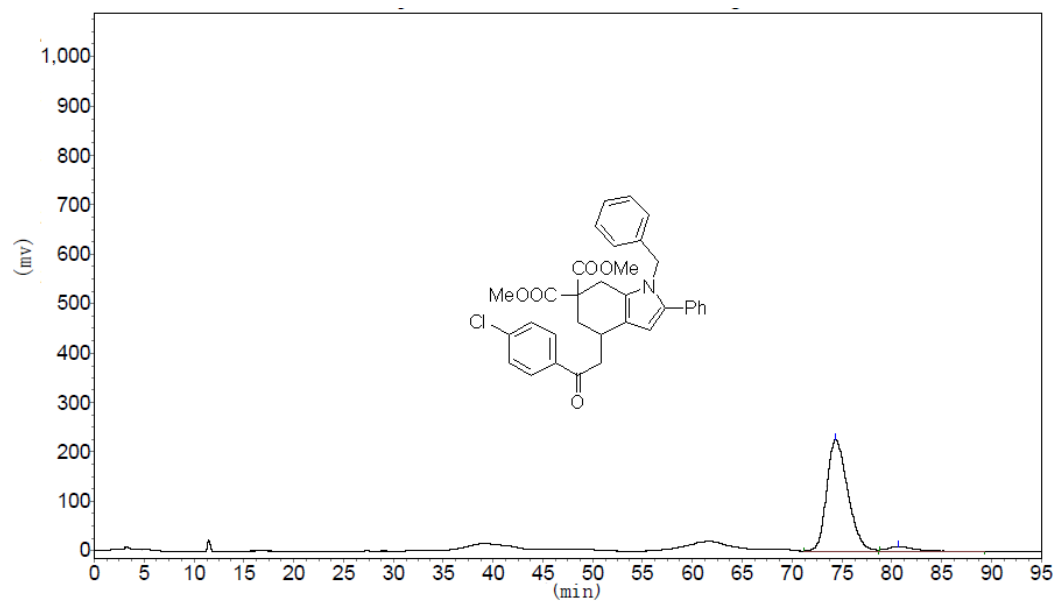

| Peak No.     | R. Time | Peak Height | Peak Area    | Percent  |
|--------------|---------|-------------|--------------|----------|
| 1            | 74.392  | 225183.922  | 32867570.000 | 95.3988  |
| 2            | 80.713  | 9254.096    | 1585253.000  | 4.6012   |
| <b>Total</b> |         | 234438.018  | 34452823.000 | 100.0000 |

## HPLC Chromatograph of 3m

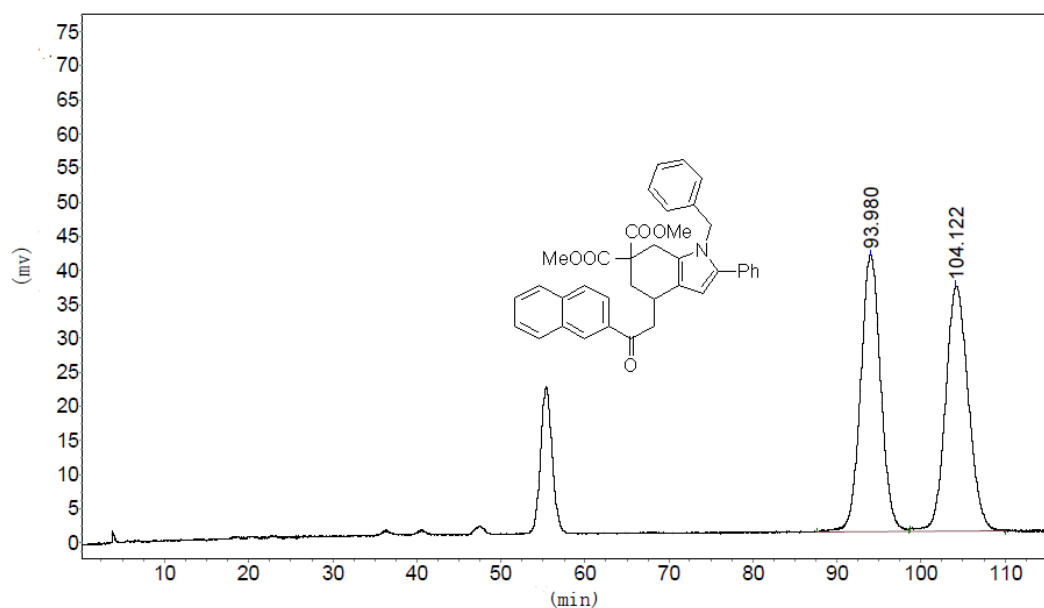

| Peak No.     | R. Time | Peak Height | Peak Area    | Percent  |
|--------------|---------|-------------|--------------|----------|
| 1            | 93.980  | 40626.441   | 6679924.000  | 49.8489  |
| 2            | 104.122 | 35979.207   | 6720421.500  | 50.1511  |
| <b>Total</b> |         | 76605.648   | 13400345.500 | 100.0000 |

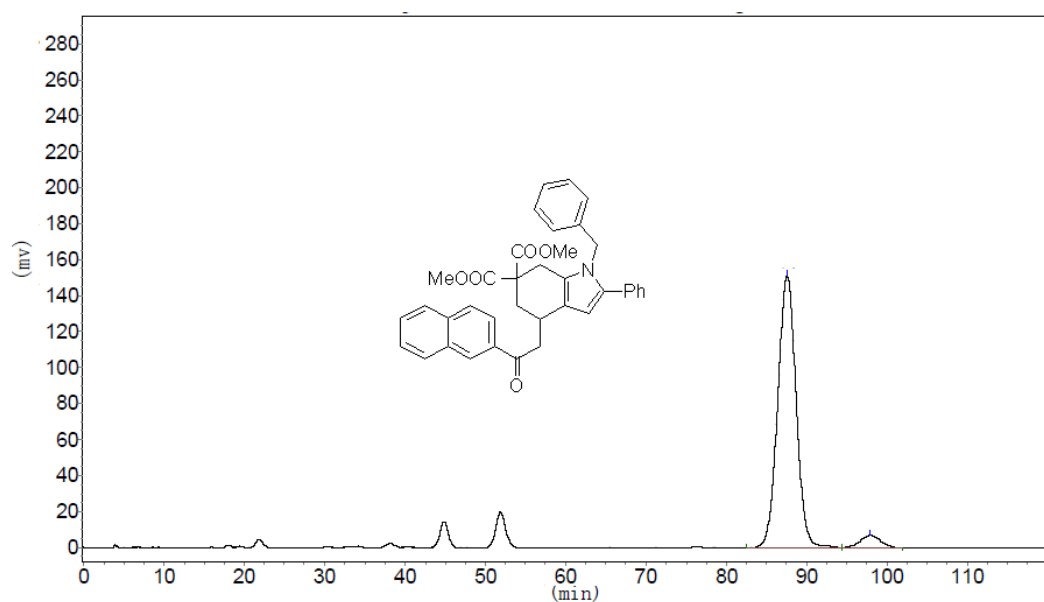

| Peak No.     | R. Time | Peak Height | Peak Area    | Percent  |
|--------------|---------|-------------|--------------|----------|
| 1            | 87.553  | 151237.656  | 23885472.000 | 95.1186  |
| 2            | 97.878  | 6988.942    | 1225792.500  | 4.8814   |
| <b>Total</b> |         | 158226.599  | 25111264.500 | 100.0000 |

## HPLC Chromatogram of 3n

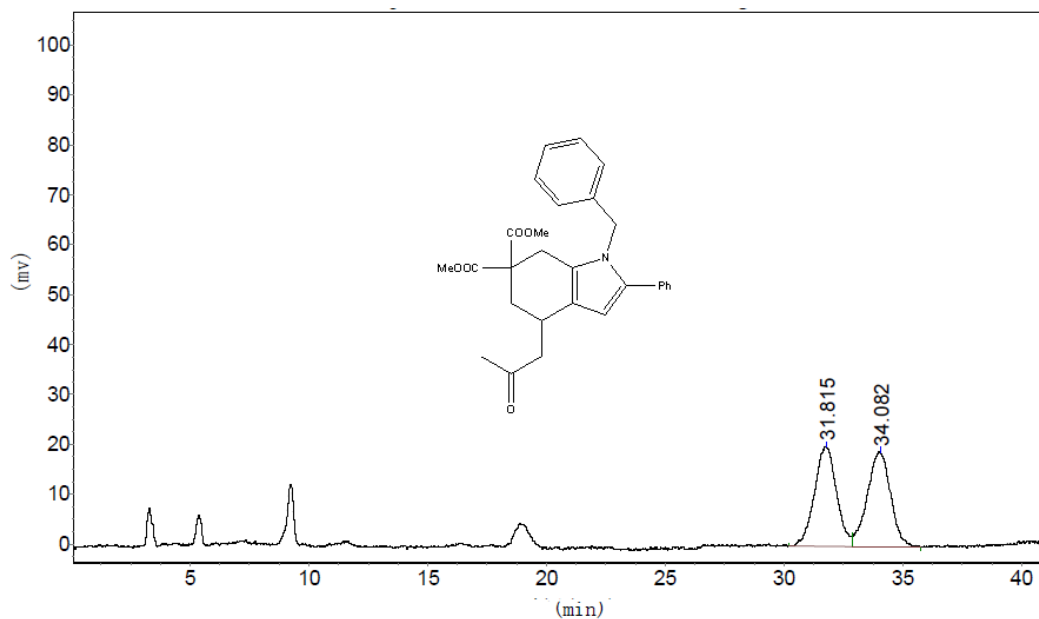

| Peak No.     | R. Time | Peak Height | Peak Area   | Percent  |
|--------------|---------|-------------|-------------|----------|
| 1            | 31.815  | 20447.604   | 1378868.750 | 50.7072  |
| 2            | 34.082  | 19316.811   | 1340405.750 | 49.2928  |
| <b>Total</b> |         | 39764.414   | 2719274.500 | 100.0000 |

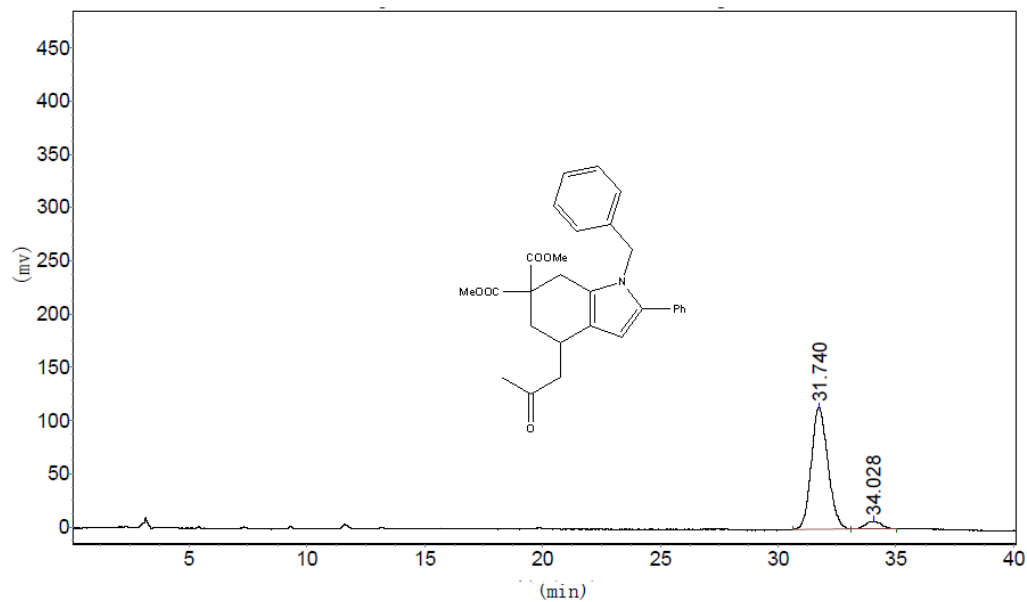

| Peak No.     | R. Time | Peak Height | Peak Area   | Percent  |
|--------------|---------|-------------|-------------|----------|
| 1            | 31.740  | 113780.242  | 5621866.500 | 94.0474  |
| 2            | 34.028  | 7160.040    | 355826.281  | 5.9526   |
| <b>Total</b> |         | 120940.282  | 5977692.781 | 100.0000 |

### HPLC Chromatograph of 3o

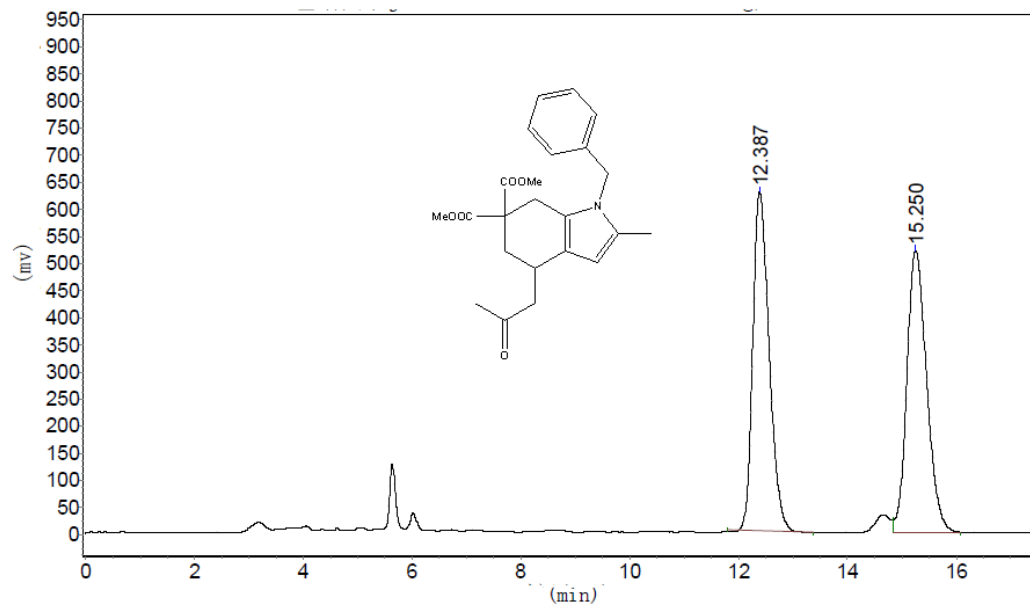

| Peak No.     | R. Time | Peak Height | Peak Area    | Percent  |
|--------------|---------|-------------|--------------|----------|
| 1            | 12.387  | 623705.000  | 12927950.000 | 49.5356  |
| 2            | 15.250  | 519027.188  | 13170336.000 | 50.4644  |
| <b>Total</b> |         | 1142732.188 | 26098286.000 | 100.0000 |

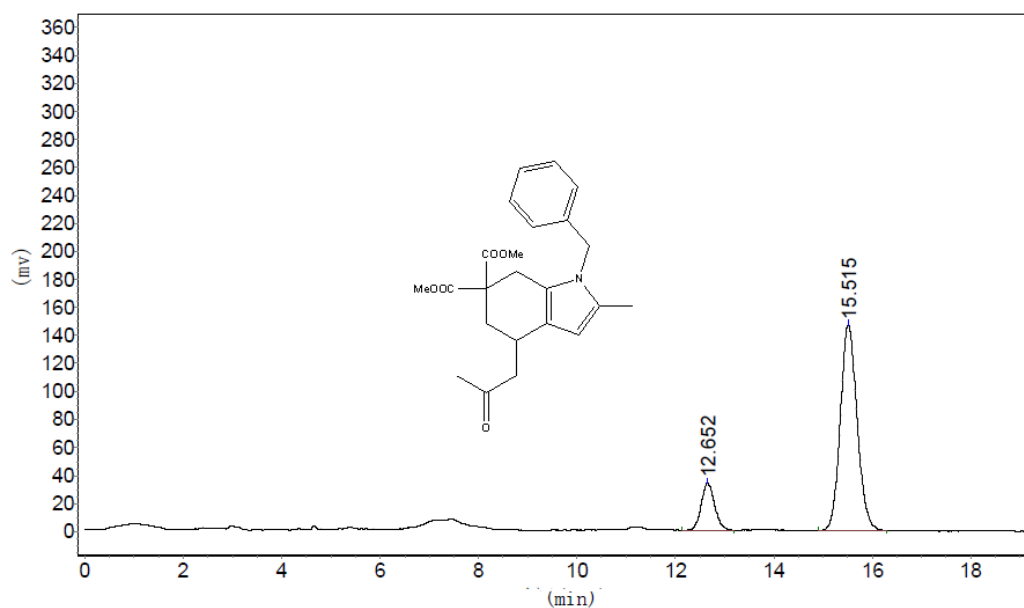

| Peak No.     | R. Time | Peak Height | Peak Area   | Percent  |
|--------------|---------|-------------|-------------|----------|
| 1            | 12.652  | 33594.027   | 637341.938  | 15.5484  |
| 2            | 15.515  | 146662.516  | 3461745.000 | 84.4516  |
| <b>Total</b> |         | 180256.543  | 4099086.938 | 100.0000 |
